# Supplementary material for: Population-based characterisation of child and adolescent oral microbiomes
Source: Research Square preprint supplement (doi:10.21203/rs.3.rs-8378803/v1), 2025-12-18
Supplement: Supplementary file 1 [file 13b6f98bf9faedacd06739e1.xlsx]

## Sheet: Sheet1
Table S8. ANOVA stats tests for associations between diet variables and age, ethnicity, gender and physical/mental health condition. Cells coloured in red indicate significant p-values (p ≤ 0.05).
		ANOVA
Variable name	Variable description	Age		Ethnicity		Gender		Physical/mental health condition
		F	p	F	p	F	p	F	p
HEFI	Healthy Eating Food Index	24.0823	9.92024e-07	2.74369	0.0645565	3.13028	0.0439036	8.82378	8.18708e-06
Diet variety score (weekly)	Diet variety score (weekly): Number of food items consumed weekly	17.7136	2.67291e-05	50.616	3.28908e-22	0.51079	0.600094	2.08316	0.100417
DSQ4	Whole grains	1.89503	0.168778	76.7686	6.1793e-33	1.84575	0.158156	4.75387	0.0026229
DSQ5	Refined grains	1.01674	0.313407	8.94094	0.000135824	0.289919	0.748354	1.36264	0.25243
DSQ6	Dairy milk	48.0019	5.59785e-12	2.39425	0.0914827	3.65134	0.0261166	1.8778	0.131215
DSQ7	Dairy yoghurt	169.186	2.69423e-37	16.7834	5.84889e-08	0.517287	0.596209	1.497	0.21342
DSQ8	Dairy cheese	21.4367	3.87416e-06	55.9556	2.0282e-24	2.06939	0.126513	0.615227	0.605123
DSQ9	Non-dairy milk/yoghurt/cheese	0.257722	0.611741	23.3905	8.91267e-11	1.00353	0.366752	4.14024	0.00616556
DSQ10	Soda/sugary drinks	117.007	1.35437e-26	4.89437	0.00757183	5.66128	0.00352987	1.54818	0.200085
DSQ11	Fruit juices	0.0509772	0.821393	4.25934	0.0142505	2.3012	0.100384	1.00038	0.391664
DSQ12	Coffee or tea	400.534	7.02268e-82	22.2101	2.83189e-10	1.91889	0.14702	1.05805	0.365777
DSQ13	Fruit	64.0903	1.92161e-15	35.254	8.58683e-16	3.25874	0.0386259	5.9024	0.000522032
DSQ14	Vegetables	5.08339	0.0242558	23.4409	8.48389e-11	1.0918	0.335798	7.2992	7.20501e-05
DSQ15	Beans/legumes	0.846329	0.357696	91.7714	5.57998e-39	2.24333	0.106352	5.87744	0.000540758
DSQ16	Red meat	6.28104	0.0122766	295.156	4.6965e-114	1.8049	0.164739	0.0824892	0.969578
DSQ17	Processed meat	11.2729	0.000800106	158.592	5.40936e-65	6.33742	0.00180191	0.373773	0.771938
DSQ18	Poultry	30.3774	3.98052e-08	38.4317	3.97457e-17	0.473281	0.62302	1.19082	0.311755
DSQ19	Fish/seafood	18.655	1.63719e-05	181.996	8.96094e-74	2.34781	0.0958219	1.96501	0.11717
DSQ20	Eggs	9.29394	0.00232701	170.459	1.82099e-69	1.59527	0.203092	1.62826	0.180767
DSQ21	Tofu/soy	0.0772608	0.781071	373.138	6.27418e-140	1.25291	0.285879	2.77421	0.040047
DSQ22	Desserts/sweets	9.70254	0.00186428	74.3104	6.14858e-32	4.29054	0.0138144	1.59103	0.189521
DSQ23	Salty snacks	2.19014	0.139043	46.986	1.06038e-20	0.496232	0.60889	3.92913	0.00825952
