# Supplementary material for: Population-based characterisation of child and adolescent oral microbiomes
Source: Research Square preprint supplement (doi:10.21203/rs.3.rs-8378803/v1), 2025-12-18
Supplement: Supplementary file 2 [file 3f863f1e1e48721c87aeff79.xlsx]

## Sheet: Sheet1
Table S5. Abundance of all genera (in number of reads) across all samples.
Genus	Taxonomy	Prevalence	Sum reads	Mean relative abundance	TAG201245	TAG211359	TAG210893	TAG202560	TAG208753	TAG209405	TAG212129	TAG209183	TAG207456	TAG209664	TAG200174	TAG211356	TAG201172	TAG204873	TAG209223	TAG210108	TAG200198	TAG211133	TAG203772	TAG210021	TAG210665	TAG208721	TAG207135	TAG207161	TAG209072	TAG210189	TAG205040	TAG210476	TAG209998	TAG211337	TAG211841	TAG204095	TAG208058	TAG208332	TAG203761	TAG204135	TAG209608	TAG212205	TAG210617	TAG206192	TAG208518	TAG206593	TAG207319	TAG206403	TAG207391
g__Jonquetella	k__Bacteria;p__Synergistetes;c__Synergistia;o__Synergistales;f__Synergistaceae;g__Jonquetella	0.00270158	92	0.000126781	0	0	0	0	0	0	0	0	0	0	0	0	0	0	0	0	0	0	0	0	0	0	0	0	0	0	0	0	0	0	0	0	0	0	0	0	0	0	0	0	0	0	0	0	0
g__Fretibacterium	k__Bacteria;p__Synergistetes;c__Synergistia;o__Synergistales;f__Synergistaceae;g__Fretibacterium	0.0991272	4526	0.00528428	0	0	0	3	0	0	0	0	0	0	0	0	0	0	0	5	0	0	0	0	0	0	0	0	0	0	0	0	0	0	0	0	76	0	0	0	0	0	3	9	0	0	0	0	0
g__Pedobacter	k__Bacteria;p__Bacteroidetes;c__Sphingobacteriia;o__Sphingobacteriales;f__Sphingobacteriaceae;g__Pedobacter	0.000623441	216	0.000180121	0	0	0	0	0	0	0	0	0	0	0	0	0	0	0	0	0	0	0	0	0	0	0	0	0	0	0	0	0	0	0	0	0	0	0	0	0	0	0	0	0	0	0	0	0
g__Flavitalea	k__Bacteria;p__Bacteroidetes;c__Chitinophagia;o__Chitinophagales;f__Chitinophagaceae;g__Flavitalea	0.00166251	43	6.98037e-05	0	0	0	0	0	0	0	0	0	0	0	0	0	0	0	0	0	0	0	0	0	0	0	0	0	0	0	0	0	0	0	0	0	0	0	0	0	0	0	0	0	0	0	0	0
Unclassified f__Chitinophagaceae	k__Bacteria;p__Bacteroidetes;c__Chitinophagia;o__Chitinophagales;f__Chitinophagaceae;Unclassified f__Chitinophagaceae	0.0014547	20	3.20408e-05	0	0	0	0	0	0	0	0	0	0	0	0	0	0	0	0	0	0	0	0	0	0	0	0	0	0	0	0	0	0	0	0	0	0	0	0	0	0	0	0	0	0	0	0	0
g__Weeksellaceae_[G-1]	k__Bacteria;p__Bacteroidetes;c__Flavobacteriia;o__Flavobacteriales;f__Weeksellaceae;g__Weeksellaceae_[G-1]	0.674148	55059	0.0517629	2	0	18	7	12	2	32	0	0	0	8	2	5	0	7	5	2	0	23	0	4	35	11	0	14	2	0	6	2	0	0	0	96	27	0	6	0	6	3	13	14	107	68	0	0
g__Riemerella	k__Bacteria;p__Bacteroidetes;c__Flavobacteriia;o__Flavobacteriales;f__Weeksellaceae;g__Riemerella	0.958437	213496	0.199003	46	16	18	43	46	154	63	5	2	66	24	11	20	59	23	32	10	2	35	10	15	46	77	3	65	99	36	119	16	7	0	15	518	68	21	18	3	27	10	74	46	184	119	5	2
g__Cloacibacterium	k__Bacteria;p__Bacteroidetes;c__Flavobacteriia;o__Flavobacteriales;f__Weeksellaceae;g__Cloacibacterium	0.512053	418899	0.410504	22	0	84	52	53	18	91	0	0	0	577	7	3	0	13	0	20	0	282	6	0	23	484	0	43	0	0	24	15	0	0	11	1601	48	0	28	0	46	0	0	0	79	960	0	0
g__Chryseobacterium	k__Bacteria;p__Bacteroidetes;c__Flavobacteriia;o__Flavobacteriales;f__Weeksellaceae;g__Chryseobacterium	0.0014547	289	0.000237803	0	0	0	0	0	0	0	0	0	0	0	0	0	0	0	0	0	0	0	0	0	0	0	0	0	0	0	0	0	0	0	0	0	0	0	0	0	0	0	0	0	0	0	0	0
Unclassified f__Weeksellaceae	k__Bacteria;p__Bacteroidetes;c__Flavobacteriia;o__Flavobacteriales;f__Weeksellaceae;Unclassified f__Weeksellaceae	0.0014547	461	0.000403038	0	0	0	0	0	0	0	0	0	0	0	0	0	0	0	0	0	0	0	0	0	0	0	0	0	0	0	0	0	0	0	0	0	0	0	0	0	0	0	0	0	0	0	0	0
g__Capnocytophaga	k__Bacteria;p__Bacteroidetes;c__Flavobacteriia;o__Flavobacteriales;f__Flavobacteriaceae;g__Capnocytophaga	0.949501	471459	0.428884	16	216	82	66	165	63	53	0	5	54	177	43	33	23	66	30	6	3	80	4	62	63	137	0	262	187	11	182	26	11	5	32	899	154	35	23	0	115	37	54	109	969	273	10	5
Unclassified o__Bacteroidales	k__Bacteria;p__Bacteroidetes;c__Bacteroidia;o__Bacteroidales;Unclassified o__Bacteroidales;Unclassified o__Bacteroidales	0.0297174	303	0.000223968	0	0	0	0	0	0	0	0	0	0	0	0	0	0	0	0	0	0	0	0	0	0	0	0	0	0	0	0	2	0	0	0	1	0	0	0	0	0	0	0	0	0	0	0	0
Unclassified f__Prevotellaceae	k__Bacteria;p__Bacteroidetes;c__Bacteroidia;o__Bacteroidales;f__Prevotellaceae;Unclassified f__Prevotellaceae	0.0415628	323	0.000351992	0	0	0	0	0	0	0	0	0	0	0	0	0	0	0	0	0	0	0	0	0	0	0	0	0	0	0	0	0	0	0	0	2	0	0	0	1	0	0	0	0	0	0	0	0
g__Prevotella	k__Bacteria;p__Bacteroidetes;c__Bacteroidia;o__Bacteroidales;f__Prevotellaceae;g__Prevotella	1	27099429	25.4193	1796	1480	3597	10024	37118	3210	4870	3694	4296	6466	1156	2435	2063	2823	8103	5808	1150	7182	5673	616	2027	5653	1024	837	4610	5415	4703	28983	8981	3550	2786	783	125786	3248	3821	731	3319	4282	24266	20830	3887	3044	1019	4215	13811
g__Bacteroides	k__Bacteria;p__Bacteroidetes;c__Bacteroidia;o__Bacteroidales;f__Bacteroidaceae;g__Bacteroides	0.000831255	374	0.000312892	0	0	0	0	0	0	0	0	0	0	0	0	0	0	0	0	0	0	0	0	0	0	0	0	0	0	0	0	0	0	0	0	0	0	0	0	0	0	0	0	0	0	0	0	0
g__Alloprevotella	k__Bacteria;p__Bacteroidetes;c__Bacteroidia;o__Bacteroidales;f__Prevotellaceae;g__Alloprevotella	0.998337	4385147	4.2329	333	1010	556	1056	2114	299	1305	66	431	221	783	397	476	460	2677	1091	98	867	591	77	190	2833	573	162	1332	810	164	702	2393	471	255	254	20089	1996	568	252	219	663	1578	1157	356	1803	131	186	149
g__Phocaeicola	k__Bacteria;p__Bacteroidetes;c__Bacteroidia;o__Bacteroidales;f__Bacteroidaceae;g__Phocaeicola	0.00207814	41	6.15364e-05	0	0	0	0	0	0	0	0	0	0	0	0	0	0	0	0	0	0	0	0	0	0	0	0	0	0	0	0	0	0	0	0	0	0	0	0	0	0	0	0	0	0	0	0	0
g__Bacteroidetes_[G-7]	k__Bacteria;p__Bacteroidetes;c__Bacteroidetes_[C-1];o__Bacteroidetes_[O-1];f__Bacteroidetes_[F-1];g__Bacteroidetes_[G-7]	0.00810474	712	0.000398881	0	0	0	0	0	0	0	15	0	0	0	0	0	0	0	0	0	0	0	0	0	0	0	0	0	0	0	0	0	0	0	0	0	0	0	0	0	0	0	0	0	0	0	0	0
g__Porphyromonas	k__Bacteria;p__Bacteroidetes;c__Bacteroidia;o__Bacteroidales;f__Porphyromonadaceae;g__Porphyromonas	0.997506	6575474	6.41907	850	1820	812	1848	2215	2461	3028	65	12	4465	363	250	109	1865	1555	1439	147	183	1442	229	524	901	2768	273	2758	8033	1388	3055	1509	126	57	275	11803	718	119	1052	28	853	707	3244	71	2036	219	131	29
g__Tannerella	k__Bacteria;p__Bacteroidetes;c__Bacteroidia;o__Bacteroidales;f__Tannerellaceae;g__Tannerella	0.863674	132224	0.134365	12	0	20	20	101	72	19	0	3	8	12	9	7	2	201	49	0	7	17	0	59	23	25	0	67	44	0	29	14	2	4	4	722	33	67	5	0	61	4	34	7	72	29	16	3
g__Bacteroidales_[G-2]	k__Bacteria;p__Bacteroidetes;c__Bacteroidia;o__Bacteroidales;f__Bacteroidales_[F-2];g__Bacteroidales_[G-2]	0.338529	21050	0.0190244	0	0	8	7	4	0	0	0	0	0	0	0	0	2	4	3	0	0	6	0	8	7	0	0	0	0	0	0	0	0	0	0	38	15	0	0	0	6	2	0	0	6	20	0	0
g__Odoribacter	k__Bacteria;p__Bacteroidetes;c__Bacteroidia;o__Bacteroidales;f__Odoribacteraceae;g__Odoribacter	0.000415628	86	3.57084e-05	0	0	0	0	0	0	0	0	0	0	0	0	0	0	0	0	0	0	0	0	0	0	0	0	0	0	0	0	0	0	0	0	0	0	0	0	0	0	0	0	0	0	0	0	0
Unclassified f__Bacteroidetes_[F-1]	k__Bacteria;p__Bacteroidetes;c__Bacteroidetes_[C-1];o__Bacteroidetes_[O-1];f__Bacteroidetes_[F-1];Unclassified f__Bacteroidetes_[F-1]	0.189942	5037	0.00432189	0	0	0	0	0	6	2	0	0	0	0	0	0	0	5	0	0	0	2	0	0	0	0	0	0	0	0	0	3	0	0	0	52	0	0	0	0	0	2	0	0	0	0	3	0
g__Bacteroidetes_[G-5]	k__Bacteria;p__Bacteroidetes;c__Bacteroidetes_[C-1];o__Bacteroidetes_[O-1];f__Bacteroidetes_[F-1];g__Bacteroidetes_[G-5]	0.0721114	3122	0.0028252	0	0	0	0	0	0	0	0	0	0	0	0	0	0	0	0	0	0	0	0	7	3	0	0	0	0	0	0	0	0	0	0	0	0	0	0	0	0	0	2	0	0	0	0	0
g__Bacteroidetes_[G-3]	k__Bacteria;p__Bacteroidetes;c__Bacteroidetes_[C-1];o__Bacteroidetes_[O-1];f__Bacteroidetes_[F-1];g__Bacteroidetes_[G-3]	0.0315877	1522	0.00204459	0	0	0	0	0	0	0	0	0	0	0	0	0	0	0	0	0	0	0	0	12	0	0	0	0	0	0	0	0	0	16	0	0	0	0	0	0	0	0	0	0	0	0	0	0
Unclassified p__Bacteroidetes	k__Bacteria;p__Bacteroidetes;Unclassified p__Bacteroidetes;Unclassified p__Bacteroidetes;Unclassified p__Bacteroidetes;Unclassified p__Bacteroidetes	0.0153782	364	0.000270614	0	0	0	0	0	0	0	0	0	0	0	0	0	0	0	0	0	0	0	0	0	0	0	0	0	0	0	0	0	0	0	0	0	0	0	0	0	0	0	0	0	2	0	0	0
Unclassified c__Actinomycetia	k__Bacteria;p__Actinobacteria;c__Actinomycetia;Unclassified c__Actinomycetia;Unclassified c__Actinomycetia;Unclassified c__Actinomycetia	0.000415628	17	1.85758e-05	0	0	0	0	0	0	0	0	0	0	0	0	0	0	0	0	0	0	0	0	0	0	0	0	0	0	0	0	0	0	0	0	0	0	0	0	0	0	0	0	0	0	0	0	0
g__Treponema	k__Bacteria;p__Spirochaetes;c__Spirochaetia;o__Spirochaetales;f__Treponemataceae;g__Treponema	0.685786	103881	0.0957037	2	0	14	25	35	132	0	0	0	6	7	13	0	7	32	35	6	3	20	0	27	4	2	0	4	53	0	4	8	0	19	0	980	29	20	2	2	55	11	26	0	5	4	24	2
g__Desulfobulbus	k__Bacteria;p__Proteobacteria;c__Deltaproteobacteria;o__Desulfobacterales;f__Desulfobulbaceae;g__Desulfobulbus	0.00436409	90	0.000108205	0	0	0	0	0	0	0	0	0	0	0	0	0	0	0	0	0	0	0	0	0	0	0	0	0	0	0	0	0	0	0	0	0	0	0	0	0	0	0	0	0	0	0	0	0
g__Peptostreptococcaceae_[G-7]	k__Bacteria;p__Firmicutes;c__Clostridia;o__Eubacteriales;f__Peptostreptococcaceae;g__Peptostreptococcaceae_[G-7]	0.00581879	72	4.77226e-05	0	0	0	0	0	0	0	0	0	0	0	0	0	0	0	0	0	0	0	0	0	0	0	0	0	0	0	0	0	0	0	0	0	0	0	0	0	0	0	0	0	0	0	0	0
g__Desulfovibrio	k__Bacteria;p__Proteobacteria;c__Deltaproteobacteria;o__Desulfovibrionales;f__Desulfovibrionaceae;g__Desulfovibrio	0.00124688	33	3.46547e-05	0	0	0	0	0	0	0	0	0	0	0	0	0	0	0	0	0	0	0	0	0	0	0	0	0	0	0	0	0	0	0	0	0	0	0	0	0	0	0	0	0	0	0	0	0
g__Desulfomicrobium	k__Bacteria;p__Proteobacteria;c__Deltaproteobacteria;o__Desulfovibrionales;f__Desulfomicrobiaceae;g__Desulfomicrobium	0.00166251	229	0.000204739	0	0	0	0	0	0	0	0	0	0	0	0	0	0	0	0	0	0	0	0	0	0	0	0	0	0	0	0	0	0	0	0	0	0	0	0	0	0	0	0	0	0	0	0	0
Unclassified o__Campylobacterales	k__Bacteria;p__Proteobacteria;c__Epsilonproteobacteria;o__Campylobacterales;Unclassified o__Campylobacterales;Unclassified o__Campylobacterales	0.000415628	19	1.64848e-05	0	0	0	0	0	0	0	0	0	0	0	0	0	0	0	0	0	0	0	0	0	0	0	0	0	0	0	0	0	0	0	0	0	0	0	0	0	0	0	0	0	0	0	0	0
g__Campylobacter	k__Bacteria;p__Proteobacteria;c__Epsilonproteobacteria;o__Campylobacterales;f__Campylobacteraceae;g__Campylobacter	0.682253	29688	0.0253958	0	0	9	5	10	2	12	2	2	0	0	2	0	2	4	4	0	5	20	3	0	8	5	0	4	3	5	7	3	0	0	0	194	2	9	0	0	2	8	3	2	4	27	0	10
Unclassified o__Hyphomicrobiales	k__Bacteria;p__Proteobacteria;c__Alphaproteobacteria;o__Hyphomicrobiales;Unclassified o__Hyphomicrobiales;Unclassified o__Hyphomicrobiales	0.000207814	27	1.96628e-05	0	0	0	0	0	0	0	0	0	0	0	0	0	0	0	0	0	0	0	0	0	0	0	0	0	0	0	0	0	0	0	0	0	0	0	0	0	0	0	0	0	0	0	0	0
g__Agrobacterium	k__Bacteria;p__Proteobacteria;c__Alphaproteobacteria;o__Hyphomicrobiales;f__Rhizobiaceae;g__Agrobacterium	0.000831255	129	9.20699e-05	0	0	0	0	0	0	0	0	0	0	0	0	0	0	0	0	0	0	0	0	0	0	0	0	0	0	0	0	0	0	0	0	0	0	0	0	0	0	0	0	0	0	0	0	0
Unclassified f__Bradyrhizobiaceae	k__Bacteria;p__Proteobacteria;c__Alphaproteobacteria;o__Hyphomicrobiales;f__Bradyrhizobiaceae;Unclassified f__Bradyrhizobiaceae	0.000207814	33	2.40323e-05	0	0	0	0	0	0	0	0	0	0	0	0	0	0	0	0	0	0	0	0	0	0	0	0	0	0	0	0	0	0	0	0	0	0	0	0	0	0	0	0	0	0	0	0	0
g__Bosea	k__Bacteria;p__Proteobacteria;c__Alphaproteobacteria;o__Hyphomicrobiales;f__Boseaceae;g__Bosea	0.000831255	9	1.08483e-05	0	0	0	0	0	0	0	0	0	0	0	0	0	0	0	0	0	0	0	0	0	0	0	0	0	0	0	0	0	0	0	0	0	0	0	0	0	0	0	0	0	0	0	0	0
g__Brevundimonas	k__Bacteria;p__Proteobacteria;c__Alphaproteobacteria;o__Caulobacterales;f__Caulobacteraceae;g__Brevundimonas	0.000623441	39	3.30979e-05	0	0	0	0	0	0	0	0	0	0	0	0	0	0	0	0	0	0	0	0	0	0	0	0	0	0	0	0	0	0	0	0	0	0	0	0	0	0	0	0	0	0	0	0	0
Unclassified f__Rhodobacteraceae	k__Bacteria;p__Proteobacteria;c__Alphaproteobacteria;o__Rhodobacterales;f__Rhodobacteraceae;Unclassified f__Rhodobacteraceae	0.00166251	460	0.000170667	0	0	0	0	0	0	0	0	0	0	0	0	0	0	0	0	0	0	0	0	0	0	0	0	0	0	0	0	0	0	0	0	0	0	0	0	0	0	0	0	0	0	0	0	0
g__Haematobacter	k__Bacteria;p__Proteobacteria;c__Alphaproteobacteria;o__Rhodobacterales;f__Rhodobacteraceae;g__Haematobacter	0.000415628	18	4.05708e-06	0	0	0	0	0	0	0	0	0	0	0	0	0	0	0	0	0	0	0	0	0	0	0	0	0	0	0	0	0	0	0	0	0	0	0	0	0	0	0	0	0	0	0	0	0
g__Roseomonas	k__Bacteria;p__Proteobacteria;c__Alphaproteobacteria;o__Rhodospirillales;f__Acetobacteraceae;g__Roseomonas	0.000831255	286	0.000190359	0	0	0	0	0	0	0	0	0	0	0	0	0	0	0	0	0	0	0	0	0	0	0	0	0	0	0	0	0	0	0	0	0	0	0	0	0	0	0	0	0	0	0	0	0
g__Delftia	k__Bacteria;p__Proteobacteria;c__Betaproteobacteria;o__Burkholderiales;f__Comamonadaceae;g__Delftia	0.00124688	212	0.000144638	0	0	0	0	0	0	0	0	0	0	0	0	0	0	0	0	0	0	0	0	0	0	0	0	0	0	0	0	0	0	0	0	0	0	0	0	0	0	0	0	0	0	0	0	0
g__Acidovorax	k__Bacteria;p__Proteobacteria;c__Betaproteobacteria;o__Burkholderiales;f__Comamonadaceae;g__Acidovorax	0.0120532	267	0.000218696	0	0	0	2	0	0	0	0	0	0	0	0	0	0	0	0	0	0	0	0	0	0	0	0	0	0	0	0	0	0	0	0	0	0	0	0	0	0	0	0	0	0	0	0	0
g__Ottowia	k__Bacteria;p__Proteobacteria;c__Betaproteobacteria;o__Burkholderiales;f__Comamonadaceae;g__Ottowia	0.410224	35515	0.0373369	3	0	0	0	57	15	0	0	0	0	17	60	0	0	41	40	0	0	0	0	0	0	7	2	0	0	0	0	9	0	4	0	21	0	6	5	0	0	2	22	0	0	2	14	0
Unclassified f__Comamonadaceae	k__Bacteria;p__Proteobacteria;c__Betaproteobacteria;o__Burkholderiales;f__Comamonadaceae;Unclassified f__Comamonadaceae	0.00768911	832	0.000705047	0	0	0	0	0	0	0	0	0	0	0	0	0	0	0	0	0	0	0	0	0	0	0	0	0	0	0	0	0	0	0	0	0	0	0	0	0	0	0	0	0	0	0	0	0
g__Lautropia	k__Bacteria;p__Proteobacteria;c__Betaproteobacteria;o__Burkholderiales;f__Burkholderiaceae;g__Lautropia	0.969867	779959	0.77674	16	221	144	34	342	811	473	30	62	75	43	84	7	14	126	189	52	230	46	22	59	270	17	17	114	18	7	485	90	39	22	30	2701	221	148	63	2	61	56	98	135	152	2636	6	73
Unclassified f__Burkholderiaceae	k__Bacteria;p__Proteobacteria;c__Betaproteobacteria;o__Burkholderiales;f__Burkholderiaceae;Unclassified f__Burkholderiaceae	0.00852037	180	0.000218563	0	0	0	0	0	0	0	0	0	0	0	0	0	0	0	0	0	0	0	0	0	0	0	0	0	0	0	0	0	0	0	0	0	0	0	0	0	0	0	0	0	2	0	0	0
g__Burkholderia	k__Bacteria;p__Proteobacteria;c__Betaproteobacteria;o__Burkholderiales;f__Burkholderiaceae;g__Burkholderia	0.00103907	82	4.13401e-05	0	0	0	0	0	0	0	0	0	0	0	0	0	0	0	0	0	0	0	0	0	0	0	0	0	0	0	0	0	0	0	0	0	0	0	0	0	0	0	0	0	0	0	0	0
g__Bordetella	k__Bacteria;p__Proteobacteria;c__Betaproteobacteria;o__Burkholderiales;f__Alcaligenaceae;g__Bordetella	0.000207814	37	2.14307e-05	0	0	0	0	0	0	0	0	0	0	0	0	0	0	0	0	0	0	0	0	0	0	0	0	0	0	0	0	0	0	0	0	0	0	0	0	0	0	0	0	0	0	0	0	0
g__Oryzomicrobium	k__Bacteria;p__Proteobacteria;c__Betaproteobacteria;o__Rhodocyclales;f__Rhodocyclaceae;g__Oryzomicrobium	0.00207814	226	0.000156048	0	0	0	0	0	0	0	0	0	0	0	0	0	0	0	0	0	0	0	0	0	0	0	0	0	0	0	0	0	0	0	0	0	0	0	0	0	0	0	0	0	0	0	0	0
Unclassified c__Betaproteobacteria	k__Bacteria;p__Proteobacteria;c__Betaproteobacteria;Unclassified c__Betaproteobacteria;Unclassified c__Betaproteobacteria;Unclassified c__Betaproteobacteria	0.00311721	131	9.46186e-05	0	0	0	0	0	0	0	0	0	0	0	0	0	0	0	0	0	0	0	0	0	0	0	0	0	0	0	0	0	0	0	0	0	0	0	0	0	0	0	0	0	0	0	0	0
g__Neisseriaceae_[G-1]	k__Bacteria;p__Proteobacteria;c__Betaproteobacteria;o__Neisseriales;f__Neisseriaceae;g__Neisseriaceae_[G-1]	0.0442643	1954	0.00191865	0	0	0	0	2	0	0	0	0	3	0	0	0	0	0	0	0	0	0	0	0	0	0	0	0	0	0	0	0	0	0	0	0	0	0	0	0	0	0	0	0	0	0	0	0
g__Eikenella	k__Bacteria;p__Proteobacteria;c__Betaproteobacteria;o__Neisseriales;f__Neisseriaceae;g__Eikenella	0.11409	4174	0.00465496	0	0	3	0	0	0	0	0	0	0	0	0	0	0	0	0	2	0	0	0	0	0	0	0	13	0	0	0	0	0	0	0	0	0	4	0	0	0	0	0	7	19	0	0	0
Unclassified f__Neisseriaceae	k__Bacteria;p__Proteobacteria;c__Betaproteobacteria;o__Neisseriales;f__Neisseriaceae;Unclassified f__Neisseriaceae	0.160848	12032	0.0109336	0	0	0	0	0	0	0	0	0	0	0	1	0	0	0	0	2	0	0	0	0	0	0	0	0	0	0	0	0	0	0	0	0	0	0	0	0	0	1	0	0	0	0	0	0
g__Neisseria	k__Bacteria;p__Proteobacteria;c__Betaproteobacteria;o__Neisseriales;f__Neisseriaceae;g__Neisseria	0.998753	17118163	15.9971	4698	8552	999	1563	15564	9257	4814	141	592	7789	1803	4723	3285	5883	3837	5793	650	1571	2215	433	1272	1639	4483	536	2392	13618	1546	10898	4950	1857	490	701	45006	1503	305	1107	1032	2785	2999	7040	687	1446	2407	349	54
g__Kingella	k__Bacteria;p__Proteobacteria;c__Betaproteobacteria;o__Neisseriales;f__Neisseriaceae;g__Kingella	0.844347	177684	0.161791	2	0	102	34	5	10	0	23	3	104	7	37	3	2	0	10	23	29	45	6	11	39	0	1	58	3	20	592	25	0	2	0	84	31	4	0	0	6	22	71	25	532	118	5	72
g__Simonsiella	k__Bacteria;p__Proteobacteria;c__Betaproteobacteria;o__Neisseriales;f__Neisseriaceae;g__Simonsiella	0.209268	23897	0.0224675	0	0	0	0	84	0	0	0	0	0	0	0	0	0	0	0	0	0	0	0	0	0	0	0	0	3	0	0	0	2	0	14	0	0	0	0	0	2	0	4	0	0	4	0	0
g__Pseudomonas	k__Bacteria;p__Proteobacteria;c__Gammaproteobacteria;o__Pseudomonadales;f__Pseudomonadaceae;g__Pseudomonas	0.0118454	69152	0.0178494	0	0	0	0	0	0	0	0	0	0	0	0	0	0	0	0	0	0	0	0	0	0	0	0	0	0	0	0	0	0	0	0	0	0	0	0	0	0	0	0	0	0	0	0	0
g__Moraxella	k__Bacteria;p__Proteobacteria;c__Gammaproteobacteria;o__Pseudomonadales;f__Moraxellaceae;g__Moraxella	0.217789	153559	0.150341	0	0	0	0	180	0	0	0	0	0	141	104	0	0	15	0	5	0	82	0	0	0	82	0	566	0	0	0	0	0	0	0	121	112	0	0	0	0	0	0	0	9	0	0	0
g__Acinetobacter	k__Bacteria;p__Proteobacteria;c__Gammaproteobacteria;o__Pseudomonadales;f__Moraxellaceae;g__Acinetobacter	0.00270158	74	6.85053e-05	0	0	0	0	0	0	0	0	0	0	0	0	0	0	0	0	0	0	0	0	0	0	0	0	0	0	0	0	0	0	0	0	0	0	0	0	0	0	0	0	0	0	0	0	0
Unclassified o__Enterobacterales	k__Bacteria;p__Proteobacteria;c__Gammaproteobacteria;o__Enterobacterales;Unclassified o__Enterobacterales;Unclassified o__Enterobacterales	0.000207814	250	4.18473e-05	0	0	0	0	0	0	0	0	0	0	0	0	0	0	0	0	0	0	0	0	0	0	0	0	0	0	0	0	0	0	0	0	0	0	0	0	0	0	0	0	0	0	0	0	0
g__Escherichia	k__Bacteria;p__Proteobacteria;c__Gammaproteobacteria;o__Enterobacterales;f__Enterobacteriaceae;g__Escherichia	0.000623441	8	5.61442e-06	0	0	0	0	0	0	0	0	0	0	0	0	0	0	0	0	0	0	0	0	0	0	0	0	0	0	0	0	0	0	0	0	0	0	0	0	0	0	0	0	0	0	0	0	0
Unclassified f__Enterobacteriaceae	k__Bacteria;p__Proteobacteria;c__Gammaproteobacteria;o__Enterobacterales;f__Enterobacteriaceae;Unclassified f__Enterobacteriaceae	0.00914381	29488	0.0208399	0	0	0	0	0	0	0	0	0	0	0	0	0	0	0	0	0	0	0	0	0	0	0	0	0	0	0	0	0	0	0	0	0	0	0	0	0	0	0	0	0	0	0	0	0
g__Klebsiella	k__Bacteria;p__Proteobacteria;c__Gammaproteobacteria;o__Enterobacterales;f__Enterobacteriaceae;g__Klebsiella	0.00103907	960	0.000170131	0	0	0	0	0	0	0	0	0	0	0	0	0	0	0	0	0	0	0	0	0	0	0	0	0	0	0	0	0	0	0	0	0	0	0	0	0	0	0	0	0	0	0	0	0
g__Serratia	k__Bacteria;p__Proteobacteria;c__Gammaproteobacteria;o__Enterobacterales;f__Yersiniaceae;g__Serratia	0.000207814	1187	0.000868604	0	0	0	0	0	0	0	0	0	0	0	0	0	0	0	0	0	0	0	0	0	0	0	0	0	0	0	0	0	0	0	0	0	0	0	0	0	0	0	0	0	0	0	0	0
g__Yersinia	k__Bacteria;p__Proteobacteria;c__Gammaproteobacteria;o__Enterobacterales;f__Yersiniaceae;g__Yersinia	0.00290939	88	7.45214e-05	0	0	0	0	0	0	0	0	0	0	0	0	0	0	0	0	0	0	0	0	0	0	0	0	0	0	0	0	0	0	0	0	0	0	0	0	0	0	0	0	0	0	0	0	0
Unclassified f__Pasteurellaceae	k__Bacteria;p__Proteobacteria;c__Gammaproteobacteria;o__Pasteurellales;f__Pasteurellaceae;Unclassified f__Pasteurellaceae	0.155653	54778	0.0527427	140	0	0	0	0	0	0	0	0	0	0	0	2	0	0	0	0	0	0	0	0	0	1	0	0	0	1	0	0	0	0	23	0	0	0	0	0	0	0	0	0	0	293	0	0
g__Haemophilus	k__Bacteria;p__Proteobacteria;c__Gammaproteobacteria;o__Pasteurellales;f__Pasteurellaceae;g__Haemophilus	0.998545	5116827	4.65677	498	479	383	1281	2780	938	1630	336	1260	548	135	239	234	1540	341	688	239	187	1380	953	286	897	2123	18	1342	2696	1359	1515	162	76	39	202	8974	1855	214	534	97	430	629	978	922	2924	976	51	101
Unclassified p__Proteobacteria	k__Bacteria;p__Proteobacteria;Unclassified p__Proteobacteria;Unclassified p__Proteobacteria;Unclassified p__Proteobacteria;Unclassified p__Proteobacteria	0.133209	1055	0.00103974	2	0	0	0	1	0	0	0	0	2	0	0	0	0	0	0	0	0	0	0	0	0	1	0	2	1	0	0	4	0	0	0	1	0	0	3	0	0	1	0	0	0	0	0	0
g__Aggregatibacter	k__Bacteria;p__Proteobacteria;c__Gammaproteobacteria;o__Pasteurellales;f__Pasteurellaceae;g__Aggregatibacter	0.919992	508254	0.47967	70	0	34	171	578	30	351	0	8	76	122	35	5	14	420	20	3	2	232	7	0	104	290	2	374	1	4	146	24	5	9	39	574	1216	13	39	0	157	40	852	58	447	186	9	23
g__Stenotrophomonas	k__Bacteria;p__Proteobacteria;c__Gammaproteobacteria;o__Xanthomonadales;f__Xanthomonadaceae;g__Stenotrophomonas	0.00893599	1020	0.000808569	0	0	0	0	0	0	0	0	0	0	0	0	0	0	0	0	0	0	0	0	0	0	0	0	0	0	0	0	0	0	0	0	0	0	0	0	0	0	0	0	0	0	0	0	0
g__Cardiobacterium	k__Bacteria;p__Proteobacteria;c__Gammaproteobacteria;o__Cardiobacteriales;f__Cardiobacteriaceae;g__Cardiobacterium	0.795719	83508	0.0811396	2	3	9	16	45	6	15	4	7	34	5	11	4	8	16	23	16	0	26	2	0	7	38	0	16	0	0	0	5	4	2	6	66	34	10	6	0	0	0	29	9	190	46	0	3
g__Fusobacterium	k__Bacteria;p__Fusobacteria;c__Fusobacteriia;o__Fusobacteriales;f__Fusobacteriaceae;g__Fusobacterium	0.998545	3425549	3.16682	135	578	374	540	1298	1879	970	33	120	605	320	209	226	548	611	372	212	112	494	170	246	575	888	32	1052	1413	950	414	1194	168	118	105	14070	675	503	9	39	737	1358	385	397	1783	338	412	101
g__Sneathia	k__Bacteria;p__Fusobacteria;c__Fusobacteriia;o__Fusobacteriales;f__Leptotrichiaceae;g__Sneathia	0.344555	48990	0.0430977	0	0	0	0	6	5	4	0	0	0	19	0	3	0	0	0	2	7	9	0	0	24	0	0	76	0	0	0	0	0	0	12	17	52	0	0	0	0	0	0	0	134	5	0	0
g__Pseudoleptotrichia	k__Bacteria;p__Fusobacteria;c__Fusobacteriia;o__Fusobacteriales;f__Leptotrichiaceae;g__Pseudoleptotrichia	0.823566	167014	0.167707	2	0	8	34	295	88	54	0	0	28	2	3	2	44	0	37	13	371	71	0	5	25	0	8	2	0	0	744	28	13	6	9	1170	42	2	0	0	4	10	38	6	207	7	8	5
g__Leptotrichia	k__Bacteria;p__Fusobacteria;c__Fusobacteriia;o__Fusobacteriales;f__Leptotrichiaceae;g__Leptotrichia	0.976101	376756	0.360343	9	19	60	71	54	40	161	2	31	121	22	60	42	34	85	44	18	621	56	4	14	50	20	3	131	81	24	221	104	94	35	0	1341	34	176	3	102	41	35	66	44	225	62	24	956
g__Arthrospira	k__Bacteria;p__Cyanobacteria;c__Oscillatoriophycideae;o__Oscillatoriales;f__Microcoleaceae;g__Arthrospira	0.24148	31836	0.0387809	0	0	14	13	0	0	0	0	0	0	0	2	0	0	2	53	0	0	0	15	0	11	0	3	0	0	0	9	0	0	10	0	72	0	3	0	0	2	0	0	3	3	3	0	6
g__Corynebacterium	k__Bacteria;p__Actinobacteria;c__Actinomycetia;o__Corynebacteriales;f__Corynebacteriaceae;g__Corynebacterium	0.717789	54273	0.0494497	0	0	18	16	14	0	13	0	6	13	6	0	0	3	2	15	3	7	6	0	2	7	13	0	7	2	2	80	9	5	0	3	67	3	0	4	0	7	18	15	26	49	32	2	20
Unclassified o__Corynebacteriales	k__Bacteria;p__Actinobacteria;c__Actinomycetia;o__Corynebacteriales;Unclassified o__Corynebacteriales;Unclassified o__Corynebacteriales	0.000207814	102	8.63141e-05	0	0	0	0	0	0	0	0	0	0	0	0	0	0	0	0	0	0	0	0	0	0	0	0	0	0	0	0	0	0	0	0	0	0	0	0	0	0	0	0	0	0	0	0	0
g__Rothia	k__Bacteria;p__Actinobacteria;c__Actinomycetia;o__Micrococcales;f__Micrococcaceae;g__Rothia	0.998545	751378	0.706752	59	31	116	341	396	99	273	130	40	263	32	196	62	173	74	148	14	136	135	24	73	98	237	4	138	107	221	293	81	72	32	41	821	102	85	35	20	65	158	236	80	84	159	47	248
g__Kocuria	k__Bacteria;p__Actinobacteria;c__Actinomycetia;o__Micrococcales;f__Micrococcaceae;g__Kocuria	0.00207814	46	7.61504e-05	0	0	0	0	0	0	0	0	0	0	0	0	0	0	0	0	0	0	0	0	0	0	0	0	0	0	0	0	0	0	0	0	0	0	0	0	0	0	0	0	0	0	0	0	0
g__Peptidiphaga	k__Bacteria;p__Actinobacteria;c__Actinomycetia;o__Actinomycetales;f__Actinomycetaceae;g__Peptidiphaga	0.136949	2998	0.00276327	0	0	0	2	0	4	0	0	0	0	0	0	0	0	2	0	0	0	0	0	0	0	0	0	0	0	0	0	0	0	0	0	11	0	0	0	0	0	0	2	0	0	2	0	0
g__Actinomyces	k__Bacteria;p__Actinobacteria;c__Actinomycetia;o__Actinomycetales;f__Actinomycetaceae;g__Actinomyces	0.850998	133380	0.110273	8	0	22	18	5	8	12	93	34	2	4	0	9	11	4	10	8	10	16	3	6	13	4	0	2	2	4	416	5	44	5	2	386	8	9	4	0	10	48	28	174	39	21	10	99
g__Mobiluncus	k__Bacteria;p__Actinobacteria;c__Actinomycetia;o__Actinomycetales;f__Actinomycetaceae;g__Mobiluncus	0.0147548	283	0.000305594	0	0	0	0	0	0	0	0	0	0	0	0	0	0	0	0	0	0	0	0	0	0	0	0	0	0	0	0	0	0	0	0	12	0	0	0	0	0	0	0	0	0	0	0	0
g__Schaalia	k__Bacteria;p__Actinobacteria;c__Actinomycetia;o__Actinomycetales;f__Actinomycetaceae;g__Schaalia	0.983791	335810	0.297221	36	17	129	80	38	49	146	207	170	42	13	12	38	34	39	58	11	182	43	5	12	19	20	0	12	36	97	136	111	17	16	8	889	55	39	14	10	10	110	98	157	28	29	52	365
g__Alloscardovia	k__Bacteria;p__Actinobacteria;c__Actinomycetia;o__Bifidobacteriales;f__Bifidobacteriaceae;g__Alloscardovia	0.00540316	145	0.000140099	0	0	0	0	0	0	0	0	3	0	0	0	0	0	0	0	0	0	0	0	0	0	0	0	0	0	0	0	0	0	0	0	0	0	0	0	0	0	11	0	0	0	0	0	0
g__Scardovia	k__Bacteria;p__Actinobacteria;c__Actinomycetia;o__Bifidobacteriales;f__Bifidobacteriaceae;g__Scardovia	0.16064	5659	0.00539309	0	0	0	0	14	0	0	0	4	0	2	0	0	0	0	11	0	2	0	0	0	0	0	0	2	0	0	0	0	0	0	0	7	5	0	0	0	0	0	2	0	0	0	0	0
g__Bifidobacterium	k__Bacteria;p__Actinobacteria;c__Actinomycetia;o__Bifidobacteriales;f__Bifidobacteriaceae;g__Bifidobacterium	0.0170407	1011	0.0016723	0	0	0	0	0	0	0	0	0	0	0	0	0	0	0	0	0	0	0	0	0	0	0	0	0	0	0	0	0	0	0	0	0	0	0	0	0	0	0	0	0	0	0	0	0
g__Propionibacteriaceae_[G-1]	k__Bacteria;p__Actinobacteria;c__Actinomycetia;o__Propionibacteriales;f__Propionibacteriaceae;g__Propionibacteriaceae_[G-1]	0.00665004	123	0.000127185	0	0	0	0	0	0	0	0	0	0	0	0	0	0	0	0	0	0	0	0	0	0	0	0	0	0	0	0	0	0	0	0	2	3	0	0	0	0	0	0	0	0	0	0	0
g__Arachnia	k__Bacteria;p__Actinobacteria;c__Actinomycetia;o__Propionibacteriales;f__Propionibacteriaceae;g__Arachnia	0.146093	2889	0.00243863	0	0	0	0	2	0	0	0	0	0	0	0	0	0	0	0	0	0	0	0	0	2	0	0	0	0	0	0	0	0	0	0	2	0	0	0	0	4	0	0	0	3	0	0	0
g__Cutibacterium	k__Bacteria;p__Actinobacteria;c__Actinomycetia;o__Propionibacteriales;f__Propionibacteriaceae;g__Cutibacterium	0.0045719	76	5.43526e-05	0	0	0	0	0	0	0	0	0	0	0	0	0	0	0	0	0	0	0	0	0	0	0	0	0	0	0	0	0	0	0	0	0	0	0	0	0	0	0	0	0	0	0	0	0
g__Slackia	k__Bacteria;p__Actinobacteria;c__Coriobacteriia;o__Eggerthellales;f__Eggerthellaceae;g__Slackia	0.00519534	57	4.36475e-05	0	0	0	0	0	0	0	0	0	0	0	0	0	0	0	0	0	0	0	0	0	0	0	0	0	0	0	0	0	0	0	0	0	0	0	0	0	0	0	0	0	0	0	0	0
g__Cryptobacterium	k__Bacteria;p__Actinobacteria;c__Coriobacteriia;o__Eggerthellales;f__Eggerthellaceae;g__Cryptobacterium	0.00415628	48	3.60582e-05	0	0	0	0	0	0	0	0	0	0	0	0	0	0	0	0	0	0	0	0	0	0	0	0	0	0	0	0	0	0	0	0	0	0	0	0	0	0	0	0	0	0	0	0	0
g__Atopobium	k__Bacteria;p__Actinobacteria;c__Coriobacteriia;o__Coriobacteriales;f__Atopobiaceae;g__Atopobium	0.000415628	56	1.19155e-05	0	0	0	0	0	0	0	0	0	0	0	0	0	0	0	0	0	0	0	0	0	0	0	0	0	0	0	0	0	0	0	0	0	0	0	0	0	0	0	0	0	0	0	0	0
g__Lancefieldella	k__Bacteria;p__Actinobacteria;c__Coriobacteriia;o__Coriobacteriales;f__Atopobiaceae;g__Lancefieldella	0.80798	122718	0.0970743	6	2	51	34	23	7	29	24	100	11	0	0	48	7	10	19	0	7	24	0	0	23	2	0	7	0	31	113	52	5	2	13	434	6	12	0	6	5	56	16	48	0	12	8	314
g__Olsenella	k__Bacteria;p__Actinobacteria;c__Coriobacteriia;o__Coriobacteriales;f__Atopobiaceae;g__Olsenella	0.0349127	774	0.000589186	0	0	0	8	0	0	2	0	0	0	0	0	0	0	0	0	0	0	0	0	0	0	0	0	0	0	0	0	0	0	0	0	0	0	0	0	0	0	0	0	0	0	0	0	0
g__Peptococcus	k__Bacteria;p__Firmicutes;c__Clostridia;o__Eubacteriales;f__Peptococcaceae;g__Peptococcus	0.353491	10226	0.00901524	0	0	0	5	9	33	0	0	0	0	3	0	0	3	3	4	3	0	0	0	0	3	0	0	0	7	0	0	0	0	0	0	81	8	3	0	0	2	0	2	0	0	4	0	0
g__Anoxybacillus	k__Bacteria;p__Firmicutes;c__Bacilli;o__Bacillales;f__Bacillaceae;g__Anoxybacillus	0.00685786	258	0.00044407	0	0	0	0	0	0	0	0	0	0	0	0	0	0	0	0	0	0	0	0	0	0	0	0	0	0	0	0	0	0	0	0	0	0	0	0	0	0	0	0	0	0	0	0	0
g__Brochothrix	k__Bacteria;p__Firmicutes;c__Bacilli;o__Bacillales;f__Listeriaceae;g__Brochothrix	0.00124688	77	7.5982e-05	0	0	0	0	0	0	0	0	0	0	0	0	0	0	0	0	0	0	0	0	0	0	0	0	0	0	0	0	0	0	0	0	0	0	0	0	0	0	0	0	0	0	0	0	0
g__Abiotrophia	k__Bacteria;p__Firmicutes;c__Bacilli;o__Lactobacillales;f__Aerococcaceae;g__Abiotrophia	0.709684	60545	0.0536927	4	21	11	5	20	3	49	0	0	4	14	6	0	0	16	3	0	2	0	0	0	49	10	0	46	0	0	20	4	0	0	3	111	17	0	4	0	0	5	44	0	12	31	0	0
Unclassified f__Lactobacillaceae	k__Bacteria;p__Firmicutes;c__Bacilli;o__Lactobacillales;f__Lactobacillaceae;Unclassified f__Lactobacillaceae	0.0214048	1378	0.0013033	0	3	0	0	0	0	0	0	0	0	0	0	0	0	0	0	0	0	0	0	0	0	0	0	0	0	0	15	0	0	0	0	0	0	0	0	0	0	0	0	0	0	0	0	0
g__Lacticaseibacillus	k__Bacteria;p__Firmicutes;c__Bacilli;o__Lactobacillales;f__Lactobacillaceae;g__Lacticaseibacillus	0.014547	677	0.00125242	0	0	0	2	0	0	0	0	0	0	0	0	0	0	0	0	0	0	0	0	0	0	0	0	0	0	0	0	0	0	0	0	0	0	0	0	0	0	0	0	3	0	0	0	0
g__Lactobacillus	k__Bacteria;p__Firmicutes;c__Bacilli;o__Lactobacillales;f__Lactobacillaceae;g__Lactobacillus	0.0432253	2022	0.00222702	0	0	0	16	0	0	0	0	0	0	0	0	0	0	0	0	0	0	0	0	0	0	0	0	0	0	0	0	0	0	0	0	0	0	0	0	0	0	0	0	0	0	0	0	0
g__Ligilactobacillus	k__Bacteria;p__Firmicutes;c__Bacilli;o__Lactobacillales;f__Lactobacillaceae;g__Ligilactobacillus	0.00353283	62	6.86686e-05	0	0	0	0	0	0	0	0	0	0	0	0	0	0	0	0	0	0	0	0	0	0	0	0	0	0	0	0	0	0	0	0	0	0	0	0	0	0	0	0	0	0	0	0	0
g__Limosilactobacillus	k__Bacteria;p__Firmicutes;c__Bacilli;o__Lactobacillales;f__Lactobacillaceae;g__Limosilactobacillus	0.0166251	665	0.000747769	0	0	0	0	3	0	0	0	0	0	0	0	0	0	0	0	0	0	0	0	0	0	0	0	0	0	0	0	0	0	0	0	0	0	0	0	0	0	0	0	0	0	0	0	0
Unclassified o__Lactobacillales	k__Bacteria;p__Firmicutes;c__Bacilli;o__Lactobacillales;Unclassified o__Lactobacillales;Unclassified o__Lactobacillales	0.0746052	716	0.000675584	0	0	0	0	3	0	0	0	0	0	0	0	0	0	0	0	0	0	0	0	0	0	0	0	0	0	0	1	0	0	0	0	0	0	0	0	0	0	0	0	0	0	0	0	0
Unclassified f__Streptococcaceae	k__Bacteria;p__Firmicutes;c__Bacilli;o__Lactobacillales;f__Streptococcaceae;Unclassified f__Streptococcaceae	0.00540316	100	0.00013322	0	0	0	0	0	0	0	0	0	0	0	0	0	0	0	0	0	2	0	0	0	0	0	0	0	0	0	0	0	0	0	0	0	0	0	0	0	0	0	0	0	0	0	0	0
g__Lactococcus	k__Bacteria;p__Firmicutes;c__Bacilli;o__Lactobacillales;f__Streptococcaceae;g__Lactococcus	0.0887365	7255	0.00853087	0	0	0	0	0	0	0	0	0	0	0	0	0	0	0	0	0	0	0	0	0	6	0	0	0	0	0	0	0	0	0	0	0	0	7	0	0	0	0	0	0	0	0	0	0
g__Streptococcus	k__Bacteria;p__Firmicutes;c__Bacilli;o__Lactobacillales;f__Streptococcaceae;g__Streptococcus	1	19714510	18.0847	1342	1042	4971	10750	10792	4003	7812	2939	4392	3679	1960	3525	439	3912	1133	1622	1066	8560	4942	798	2690	3016	1530	330	3827	4759	3928	30406	1867	2666	597	1897	18575	1553	1271	1009	852	2027	6529	4694	7782	2440	3061	645	8918
g__Enterococcus	k__Bacteria;p__Firmicutes;c__Bacilli;o__Lactobacillales;f__Enterococcaceae;g__Enterococcus	0.00374065	36	2.90504e-05	0	0	0	0	0	0	0	0	0	0	0	0	0	0	0	0	0	0	0	0	0	0	0	0	0	0	0	0	0	0	0	0	0	0	0	0	0	0	0	0	0	0	0	0	0
g__Granulicatella	k__Bacteria;p__Firmicutes;c__Bacilli;o__Lactobacillales;f__Carnobacteriaceae;g__Granulicatella	0.999169	2248941	2.18174	218	6	877	401	1008	376	744	116	80	230	850	420	75	223	400	260	122	81	634	91	118	1486	228	103	1385	581	204	1337	163	112	20	378	3428	722	91	178	28	78	521	632	181	3163	618	44	263
g__Gemella	k__Bacteria;p__Firmicutes;c__Bacilli;o__Bacillales;f__Gemellaceae;g__Gemella	0.997922	4052467	3.94831	336	129	952	802	963	613	2709	1031	92	855	1074	447	64	462	523	350	252	127	426	573	631	1450	550	96	1665	1297	217	1879	455	156	70	859	5039	713	162	365	7	557	886	2322	1182	1962	901	48	71
Unclassified o__Bacillales	k__Bacteria;p__Firmicutes;c__Bacilli;o__Bacillales;Unclassified o__Bacillales;Unclassified o__Bacillales	0.00374065	48	3.69309e-05	0	0	0	0	0	0	0	0	0	0	0	0	0	0	0	0	0	0	0	0	0	0	0	0	0	0	0	0	0	0	0	0	0	0	0	0	0	0	0	0	0	0	0	0	0
Unclassified c__Bacilli	k__Bacteria;p__Firmicutes;c__Bacilli;Unclassified c__Bacilli;Unclassified c__Bacilli;Unclassified c__Bacilli	0.0386534	378	0.000366153	0	0	0	2	0	0	0	0	0	0	0	0	0	0	0	0	0	0	0	0	0	0	0	0	0	0	0	0	0	0	0	0	0	0	0	0	0	0	0	0	0	0	0	0	0
g__Jeotgalicoccus	k__Bacteria;p__Firmicutes;c__Bacilli;o__Bacillales;f__Staphylococcaceae;g__Jeotgalicoccus	0.000415628	16	7.46397e-05	0	0	0	0	0	0	0	0	0	0	0	0	0	0	0	0	0	0	0	0	0	0	0	0	0	0	0	0	0	0	0	0	0	0	0	0	0	0	0	0	0	0	0	0	0
g__Staphylococcus	k__Bacteria;p__Firmicutes;c__Bacilli;o__Bacillales;f__Staphylococcaceae;g__Staphylococcus	0.0671239	1883	0.00171942	0	0	0	0	0	0	0	0	0	0	0	0	0	0	0	0	0	0	0	0	0	0	0	0	0	0	0	0	0	0	0	0	9	0	0	0	0	0	0	0	0	0	0	0	0
g__Eggerthia	k__Bacteria;p__Firmicutes;c__Erysipelotrichia;o__Erysipelotrichales;f__Coprobacillaceae;g__Eggerthia	0.0332502	2425	0.00329117	0	0	0	0	0	0	0	0	0	0	0	0	0	0	6	0	0	0	0	0	0	0	0	0	0	0	0	4	0	0	0	0	0	0	0	0	0	0	0	0	0	0	0	0	0
g__Peptoniphilaceae_[G-2]	k__Bacteria;p__Firmicutes;c__Tissierellia;o__Tissierellales;f__Peptoniphilaceae;g__Peptoniphilaceae_[G-2]	0.000415628	39	1.54718e-05	0	0	0	0	0	0	0	0	0	0	0	0	0	0	0	0	0	0	0	0	0	0	0	0	0	0	0	0	0	0	0	0	0	0	0	0	0	0	0	0	0	0	0	0	0
g__Peptoniphilaceae_[G-1]	k__Bacteria;p__Firmicutes;c__Tissierellia;o__Tissierellales;f__Peptoniphilaceae;g__Peptoniphilaceae_[G-1]	0.00103907	17	2.07854e-05	0	0	0	0	0	0	0	0	0	0	0	0	0	0	0	0	0	0	0	0	0	0	0	0	0	0	0	0	0	0	0	0	0	0	0	0	0	0	0	0	0	0	0	0	0
g__Parvimonas	k__Bacteria;p__Firmicutes;c__Tissierellia;o__Tissierellales;f__Peptoniphilaceae;g__Parvimonas	0.608063	66063	0.0574939	11	0	0	13	65	96	8	3	0	9	0	0	0	25	17	2	20	0	2	0	2	0	48	4	8	51	5	0	0	0	0	0	222	5	7	14	0	3	0	21	6	0	11	0	33
Unclassified f__Peptoniphilaceae	k__Bacteria;p__Firmicutes;c__Tissierellia;o__Tissierellales;f__Peptoniphilaceae;Unclassified f__Peptoniphilaceae	0.00124688	23	3.493e-05	0	0	0	0	0	0	0	0	0	0	0	0	0	0	0	0	0	0	0	0	0	0	0	0	0	0	0	0	0	0	0	0	0	0	0	0	0	0	0	0	0	0	0	0	0
g__Peptostreptococcus	k__Bacteria;p__Firmicutes;c__Clostridia;o__Eubacteriales;f__Peptostreptococcaceae;g__Peptostreptococcus	0.881338	211983	0.196	9	18	97	50	6	48	146	2	0	130	4	0	11	43	28	69	0	26	22	11	86	20	12	0	25	94	11	40	371	17	12	0	617	68	8	14	13	105	34	27	0	5	14	10	0
g__Peptostreptococcaceae_[G-5]	k__Bacteria;p__Firmicutes;c__Clostridia;o__Eubacteriales;f__Peptostreptococcaceae;g__Peptostreptococcaceae_[G-5]	0.141729	9502	0.00937081	0	0	0	0	0	36	0	0	0	0	0	0	0	0	11	0	0	0	0	0	0	0	0	0	0	12	0	0	0	0	0	0	25	0	0	3	0	19	0	0	0	0	0	0	0
g__Peptostreptococcaceae_[G-4]	k__Bacteria;p__Firmicutes;c__Clostridia;o__Eubacteriales;f__Peptostreptococcaceae;g__Peptostreptococcaceae_[G-4]	0.00955943	205	0.000167405	0	0	0	0	0	0	0	0	0	0	0	0	0	0	0	0	0	0	0	0	0	0	0	0	0	0	0	0	0	0	0	0	0	0	0	0	0	0	0	0	0	0	0	0	0
g__Peptostreptococcaceae_[G-9]	k__Bacteria;p__Firmicutes;c__Clostridia;o__Eubacteriales;f__Peptostreptococcaceae;g__Peptostreptococcaceae_[G-9]	0.377598	18125	0.019228	0	0	2	15	140	2	5	0	0	0	3	6	0	7	6	2	11	0	2	0	29	19	3	5	0	0	2	0	0	0	0	2	109	0	5	0	0	2	2	2	6	0	8	2	0
g__Peptostreptococcaceae_[G-1]	k__Bacteria;p__Firmicutes;c__Clostridia;o__Eubacteriales;f__Peptostreptococcaceae;g__Peptostreptococcaceae_[G-1]	0.924771	491193	0.474844	60	0	85	22	120	151	221	0	0	206	57	39	31	87	132	218	9	44	50	0	36	261	49	0	25	72	22	185	522	131	107	0	3192	81	126	11	130	93	160	154	0	10	27	56	25
g__Peptostreptococcaceae_[G-6]	k__Bacteria;p__Firmicutes;c__Clostridia;o__Eubacteriales;f__Peptostreptococcaceae;g__Peptostreptococcaceae_[G-6]	0.0130923	419	0.000367888	0	0	0	0	0	0	0	0	0	0	0	0	0	0	0	0	0	0	0	0	0	0	0	0	0	0	0	0	0	0	0	0	0	0	0	0	0	0	0	4	0	0	0	0	0
g__Mogibacterium	k__Bacteria;p__Firmicutes;c__Clostridia;o__Eubacteriales;f__Peptostreptococcaceae;g__Mogibacterium	0.62074	26335	0.0218397	0	4	6	5	11	4	3	4	7	0	0	0	3	0	3	5	0	5	11	0	6	15	2	0	0	0	0	34	12	3	0	0	184	6	9	0	3	3	29	6	4	6	7	0	11
g__Peptostreptococcaceae_[G-2]	k__Bacteria;p__Firmicutes;c__Clostridia;o__Eubacteriales;f__Peptostreptococcaceae;g__Peptostreptococcaceae_[G-2]	0.156068	4669	0.00491956	0	4	0	0	0	10	0	0	0	0	0	0	0	3	3	0	0	0	0	0	0	0	0	0	0	0	0	0	0	0	0	0	111	7	0	0	0	4	0	0	0	0	0	0	0
g__Ruminococcaceae_[G-3]	k__Bacteria;p__Firmicutes;c__Clostridia;o__Eubacteriales;f__Ruminococcaceae;g__Ruminococcaceae_[G-3]	0.000415628	18	7.76423e-06	0	0	0	0	0	0	0	0	0	0	0	0	0	0	0	0	0	0	0	0	0	0	0	0	0	0	0	0	0	0	0	0	0	0	0	0	0	0	0	0	0	0	0	0	0
g__Clostridiales_[F-1][G-1]	k__Bacteria;p__Firmicutes;c__Clostridia;o__Eubacteriales;f__Clostridiales_[F-1];g__Clostridiales_[F-1][G-1]	0.0116376	235	0.00022666	0	0	0	0	0	0	0	0	0	0	0	0	0	0	0	0	0	0	0	0	0	0	0	0	0	0	0	0	0	0	0	0	0	0	0	0	0	0	0	0	0	0	0	0	0
g__Ruminococcaceae_[G-1]	k__Bacteria;p__Firmicutes;c__Clostridia;o__Eubacteriales;f__Ruminococcaceae;g__Ruminococcaceae_[G-1]	0.657938	98093	0.0877936	7	0	20	8	12	117	98	0	0	16	2	3	0	0	13	8	0	0	45	0	0	62	12	0	24	2	0	0	29	0	0	0	379	13	0	3	2	5	2	39	0	19	88	0	0
g__Ruminococcaceae_[G-2]	k__Bacteria;p__Firmicutes;c__Clostridia;o__Eubacteriales;f__Ruminococcaceae;g__Ruminococcaceae_[G-2]	0.871155	259776	0.227458	50	0	10	24	57	114	122	17	196	49	21	2	24	7	41	79	3	9	88	0	0	110	4	0	156	25	8	0	267	7	40	8	979	32	40	29	13	72	176	68	0	16	85	23	96
g__Lachnospiraceae_[G-8]	k__Bacteria;p__Firmicutes;c__Clostridia;o__Eubacteriales;f__Lachnospiraceae;g__Lachnospiraceae_[G-8]	0.0559019	1078	0.000838952	0	0	0	0	0	0	0	0	0	0	0	0	0	0	0	0	0	0	0	0	0	0	0	0	0	0	0	0	0	0	0	0	6	0	0	0	0	0	0	0	0	0	0	0	0
g__Lachnospiraceae_[G-2]	k__Bacteria;p__Firmicutes;c__Clostridia;o__Eubacteriales;f__Lachnospiraceae;g__Lachnospiraceae_[G-2]	0.476933	41286	0.0364223	0	0	0	6	8	55	5	0	0	0	0	0	0	0	13	13	0	12	0	0	0	13	0	0	4	0	0	10	13	0	0	0	274	62	0	2	3	2	5	0	0	34	0	2	0
g__Lachnospiraceae_[G-3]	k__Bacteria;p__Firmicutes;c__Clostridia;o__Eubacteriales;f__Lachnospiraceae;g__Lachnospiraceae_[G-3]	0.245844	8101	0.00715162	0	0	2	0	4	28	0	0	0	0	0	0	0	0	3	0	2	0	0	0	0	2	0	0	3	3	0	0	2	0	0	0	5	4	0	2	0	0	0	3	0	17	2	0	0
g__Johnsonella	k__Bacteria;p__Firmicutes;c__Clostridia;o__Eubacteriales;f__Lachnospiraceae;g__Johnsonella	0.0675395	1343	0.00109684	0	0	0	3	0	0	0	0	0	2	0	0	0	0	0	0	0	0	0	0	0	0	0	0	0	0	0	0	0	0	0	0	9	0	0	0	0	0	0	0	0	4	0	0	0
g__Lachnoanaerobaculum	k__Bacteria;p__Firmicutes;c__Clostridia;o__Eubacteriales;f__Lachnospiraceae;g__Lachnoanaerobaculum	0.986492	242061	0.226	19	43	29	18	154	124	29	93	61	36	3	25	11	28	33	79	11	61	37	3	44	28	12	0	37	47	12	267	67	33	4	5	959	46	44	16	14	35	54	43	17	65	33	27	193
Unclassified f__Lachnospiraceae	k__Bacteria;p__Firmicutes;c__Clostridia;o__Eubacteriales;f__Lachnospiraceae;Unclassified f__Lachnospiraceae	0.0829177	1913	0.0018064	0	0	0	0	3	0	0	0	0	0	0	0	0	0	0	0	0	0	4	0	0	0	0	0	0	0	0	0	0	0	0	0	0	0	0	0	0	0	0	2	0	2	7	0	0
g__Stomatobaculum	k__Bacteria;p__Firmicutes;c__Clostridia;o__Eubacteriales;f__Lachnospiraceae;g__Stomatobaculum	0.823566	81621	0.0718319	2	4	5	18	35	40	20	7	15	12	2	6	5	6	12	12	5	10	36	2	12	10	11	0	11	8	16	41	8	4	4	0	324	6	15	12	5	4	13	7	4	3	0	0	40
g__Shuttleworthia	k__Bacteria;p__Firmicutes;c__Clostridia;o__Eubacteriales;f__Lachnospiraceae;g__Shuttleworthia	0.081463	2481	0.00250751	0	0	8	3	0	0	0	0	0	0	0	0	0	0	0	2	0	0	2	0	0	0	0	0	0	0	0	0	0	0	0	0	0	0	0	0	0	0	0	2	0	0	0	0	0
g__Oribacterium	k__Bacteria;p__Firmicutes;c__Clostridia;o__Eubacteriales;f__Lachnospiraceae;g__Oribacterium	0.990648	582825	0.523112	30	119	113	253	145	154	132	35	217	112	11	27	35	79	81	94	19	25	137	16	65	250	103	2	55	65	98	441	81	22	5	21	1721	129	107	28	53	63	84	57	151	17	445	59	71
g__Butyrivibrio	k__Bacteria;p__Firmicutes;c__Clostridia;o__Eubacteriales;f__Lachnospiraceae;g__Butyrivibrio	0.678512	108491	0.092807	7	0	18	60	6	10	23	0	117	18	4	4	0	7	183	12	2	54	38	0	0	25	0	0	0	0	2	110	115	20	6	0	664	31	0	3	19	0	13	13	8	0	25	9	111
g__Lachnospiraceae_[G-7]	k__Bacteria;p__Firmicutes;c__Clostridia;o__Eubacteriales;f__Lachnospiraceae;g__Lachnospiraceae_[G-7]	0.00581879	84	7.44757e-05	0	0	0	0	0	0	0	0	0	0	0	0	0	0	0	0	0	0	0	0	0	0	0	0	0	0	0	0	0	0	0	0	5	0	0	0	0	0	0	0	0	0	0	0	0
g__Catonella	k__Bacteria;p__Firmicutes;c__Clostridia;o__Eubacteriales;f__Lachnospiraceae;g__Catonella	0.950956	176898	0.167145	4	9	32	190	16	36	81	0	13	15	20	2	20	14	35	31	11	17	132	7	43	30	3	0	42	16	71	57	27	41	0	7	444	20	97	6	4	108	40	9	8	4	44	43	11
Unclassified f__Veillonellaceae	k__Bacteria;p__Firmicutes;c__Negativicutes;o__Veillonellales;f__Veillonellaceae;Unclassified f__Veillonellaceae	0.0162095	121	0.000103385	0	0	0	0	0	0	0	0	0	0	0	0	0	0	0	0	0	0	0	0	0	0	0	0	0	0	0	0	0	0	0	0	0	0	0	0	0	0	0	0	0	0	0	0	0
g__Dialister	k__Bacteria;p__Firmicutes;c__Negativicutes;o__Veillonellales;f__Veillonellaceae;g__Dialister	0.414381	17080	0.0155155	0	0	2	15	0	3	6	0	0	0	0	0	0	0	4	11	0	0	0	0	2	0	0	0	3	2	0	2	0	0	0	0	88	14	2	0	0	0	3	18	15	0	6	4	0
g__Veillonella	k__Bacteria;p__Firmicutes;c__Negativicutes;o__Veillonellales;f__Veillonellaceae;g__Veillonella	1	9060630	7.59023	536	629	4071	4202	6998	1185	1722	2240	4665	1030	268	237	462	1291	556	1320	296	3123	1882	261	479	2120	504	93	1758	1155	2063	12168	4782	233	437	430	34005	1956	1103	284	712	498	4513	1720	2105	1287	774	173	14824
g__Megasphaera	k__Bacteria;p__Firmicutes;c__Negativicutes;o__Veillonellales;f__Veillonellaceae;g__Megasphaera	0.816708	539665	0.42674	22	0	178	163	249	2	78	209	1066	0	9	2	22	4	114	93	2	11	168	8	6	172	0	0	89	0	7	377	145	9	30	5	3806	26	130	4	42	8	162	57	216	0	52	21	1422
g__Colibacter	k__Bacteria;p__Firmicutes;c__Negativicutes;o__Veillonellales;f__Veillonellaceae;g__Colibacter	0.00727348	533	0.00045495	0	0	0	0	0	0	0	0	0	0	0	0	0	0	0	0	0	0	0	0	0	0	0	0	0	0	0	0	0	0	0	0	0	0	0	0	0	0	0	0	0	0	0	0	0
g__Anaeroglobus	k__Bacteria;p__Firmicutes;c__Negativicutes;o__Veillonellales;f__Veillonellaceae;g__Anaeroglobus	0.024522	599	0.000624239	0	0	0	0	0	0	0	0	0	0	0	0	0	0	0	0	0	0	0	0	0	0	0	0	0	0	0	0	0	0	0	0	0	0	0	0	0	0	0	0	0	0	0	0	0
Unclassified c__Negativicutes	k__Bacteria;p__Firmicutes;c__Negativicutes;Unclassified c__Negativicutes;Unclassified c__Negativicutes;Unclassified c__Negativicutes	0.00270158	25	1.71912e-05	0	0	0	0	0	0	0	0	0	0	0	0	0	0	0	0	0	0	0	0	0	0	0	0	0	0	0	0	0	0	0	0	0	0	0	0	0	0	0	0	0	0	0	0	0
g__Veillonellaceae_[G-1]	k__Bacteria;p__Firmicutes;c__Negativicutes;o__Selenomonadales;f__Selenomonadaceae;g__Veillonellaceae_[G-1]	0.126351	3817	0.00372886	0	0	0	28	0	0	0	0	0	0	0	0	0	0	0	0	4	0	0	0	0	2	0	0	0	0	0	0	0	0	0	0	4	0	0	0	0	0	0	4	6	0	0	2	0
g__Mitsuokella	k__Bacteria;p__Firmicutes;c__Negativicutes;o__Selenomonadales;f__Selenomonadaceae;g__Mitsuokella	0.0654613	7466	0.00760294	0	0	0	7	0	0	0	0	0	0	0	0	0	0	0	0	0	0	0	0	0	0	0	0	0	0	0	35	0	0	0	0	18	2	0	0	0	0	5	0	0	0	0	0	0
Unclassified f__Selenomonadaceae	k__Bacteria;p__Firmicutes;c__Negativicutes;o__Selenomonadales;f__Selenomonadaceae;Unclassified f__Selenomonadaceae	0.00519534	59	4.90948e-05	0	0	0	0	0	0	0	0	0	0	0	0	0	0	0	0	0	0	0	0	0	0	0	0	0	0	0	0	0	0	0	0	0	0	0	0	0	0	0	0	0	0	0	0	0
g__Selenomonas	k__Bacteria;p__Firmicutes;c__Negativicutes;o__Selenomonadales;f__Selenomonadaceae;g__Selenomonas	0.972153	472039	0.442408	10	5	117	153	89	213	68	5	78	25	47	27	9	12	235	64	11	263	101	2	16	121	2	4	160	16	6	126	327	38	40	21	1758	108	68	6	89	82	42	122	109	47	140	149	408
Unclassified p__Firmicutes	k__Bacteria;p__Firmicutes;Unclassified p__Firmicutes;Unclassified p__Firmicutes;Unclassified p__Firmicutes;Unclassified p__Firmicutes	0.0363674	238	0.000193033	0	0	0	0	0	0	0	0	0	0	0	0	0	0	0	0	0	0	1	0	0	0	0	0	0	0	0	0	0	0	0	0	0	0	0	0	0	0	0	0	0	0	0	0	0
g__Absconditabacteria_(SR1)_[G-1]	k__Bacteria;p__Absconditabacteria_(SR1);c__Absconditabacteria_(SR1)_[C-1];o__Absconditabacteria_(SR1)_[O-1];f__Absconditabacteria_(SR1)_[F-1];g__Absconditabacteria_(SR1)_[G-1]	0.027847	477	0.00031245	0	0	0	0	0	0	0	0	0	0	0	0	0	0	0	0	0	0	0	0	0	0	0	0	0	0	0	0	0	0	0	0	3	0	0	0	0	0	0	0	0	0	0	0	0
g__Gracilibacteria_(GN02)_[G-1]	k__Bacteria;p__Gracilibacteria_(GN02);c__Gracilibacteria_(GN02)_[C-1];o__Gracilibacteria_(GN02)_[O-1];f__Gracilibacteria_(GN02)_[F-1];g__Gracilibacteria_(GN02)_[G-1]	0.0494597	745	0.000668194	0	0	0	0	0	0	0	0	0	0	0	0	0	0	0	0	0	0	0	0	0	2	0	0	0	0	0	0	0	0	0	0	0	0	0	0	0	2	0	0	0	5	0	0	0
[truncated: 4,767 more columns]
