# Supplementary material for: Population-based characterisation of child and adolescent oral microbiomes
Source: Research Square preprint supplement (doi:10.21203/rs.3.rs-8378803/v1), 2025-12-18
Supplement: Supplementary file 3 [file 4bed4b4488ab409d7cca0ed7.xlsx]

## Sheet: Sheet1
Table S2. PERMANOVA tests for associations between phylogenetic-RPCA distances and all metadata variables. Cells coloured in red indicate significant p-values (p ≤ 0.05). All multivariate tests include Family ID as strata unless it is included as a variable.
Variable name	n	Variable description	Univariate		Basic variables		Basic variables one child per family ID		Basic variables no individual family ID		Basic variables no individual family ID		Basic variables two child families		Basic variables two child families		Marginalisation/environmental variables current		Ontario marginalisation		Marginalisation/environmental variables current, school & utero		Diet variables		Basic variables (diet participants)		All variables		All variables no antibiotics users
			n depends on variable		n=4,812		n=3,817		n=1,885		n=1,885 (ID shuffled)		n=1,588		n=1,588 (ID shuffled)		n=4,178		n=3,776		n=2,571		n=2,978		n=2,978		n=2,594		n=2,426
			R2	p	R2	p	R2	p	R2	p	R2	p	R2	p	R2	p	R2	p	R2	p	R2	p	R2	p	R2	p	R2	p	R2	p
Family ID	4812	Which family the participant comes from	0.858139	0.001	NA	NA	NA	NA	0.614179	0.001	NA	NA	0.641427	0.001	NA	NA	NA	NA	NA	NA	NA	NA	NA	NA	NA	NA	NA	NA	NA	NA
Family ID shuffled		Randomised family IDs for sensitivity analysis	NA	NA	NA	NA	NA	NA	NA	NA	0.445246	0.856	NA	NA	0.465206	0.937	NA	NA	NA	NA	NA	NA	NA	NA	NA	NA	NA	NA	NA	NA
Gender	4812	Male/female/non-binary or trans	0.00408345	0.001	0.00408139	0.027	0.0033138	0.001	0.00075249	0.365	0.00126389	0.287	0.000830499	0.415	0.00434833	0.004	0.0048982	0.047	0.00449124	0.079	0.00514004	0.002	0.0057928	0.002	0.00624301	0.001	0.00619838	0.005	0.00620111	0.006
Age		Age	0.0146707	0.001	0.0141249	0.001	0.0138852	0.001	0.00400418	0.001	0.00906229	0.001	0.00305228	0.002	0.00800976	0.001	0.0148148	0.001	0.0137341	0.001	0.0161964	0.006	0.00558498	0.001	0.00863026	0.001	0.00602978	0.001	0.00472498	0.018
Ethnicity		White/East Asian/South Asian	0.0108779	0.001	0.00977585	0.017	0.00844357	0.001	0.00215385	0.012	0.00804859	0.001	0.00260451	0.009	0.0065724	0.001	0.00661616	0.053	0.00522718	0.003	0.0077831	0.05	0.00306988	0.062	0.00842174	0.001	0.00205137	0.083	0.0019939	0.233
Physical/mental health condition		(None/physical condition/mental condition/physical & mental condition)	0.00256568	0.002	0.00148151	0.034	0.000997481	0.265	0.00224913	0.048	0.00274019	0.111	0.00254583	0.048	0.00421598	0.034	0.00140423	0.003	0.0019231	0.002	0.00242696	0.031	0.000735847	0.562	0.00108113	0.415	0.000608566	0.636	0.000592524	0.62
Social deprivation (current)	4178	Social deprivation	0.000797187	0.041	NA	NA	NA	NA	NA	NA	NA	NA	NA	NA	NA	NA	0.000720736	0.097	NA	NA	0.000129953	0.365	NA	NA	NA	NA	0.00117101	0.091	0.000916911	0.218
Material deprivation (current)		Material deprivation	0.000482522	0.138	NA	NA	NA	NA	NA	NA	NA	NA	NA	NA	NA	NA	2.29396e-05	0.323	NA	NA	0.00036194	0.035	NA	NA	NA	NA	0.000236709	0.592	0.000390803	0.632
Reside in GTA (current)		Living in the Greater Toronto Area	0.00367486	0.001	NA	NA	NA	NA	NA	NA	NA	NA	NA	NA	NA	NA	0.000275125	1	0.000531647	0.808	0.000276716	0.443	NA	NA	NA	NA	5.98198e-05	0.969	2.37449e-05	0.748
Index of rurality (current)		Living rurally	0.00539514	0.001	NA	NA	NA	NA	NA	NA	NA	NA	NA	NA	NA	NA	0.000724098	0.011	0.00129913	0.007	0.000193834	0.051	NA	NA	NA	NA	0.000315699	0.585	0.000323757	0.725
Greenspace (growing season mean) (current)		Greenspace in neighbourhood	0.00298818	0.001	NA	NA	NA	NA	NA	NA	NA	NA	NA	NA	NA	NA	0.000170431	0.038	0.000290159	0.07	0.000945665	0.226	NA	NA	NA	NA	0.000445487	0.013	0.000287981	0.058
PM2.5 (µg m-3) (current)		Particulate matter pollution levels	0.00460902	0.001	NA	NA	NA	NA	NA	NA	NA	NA	NA	NA	NA	NA	0.000425036	0.586	0.00062561	0.595	0.000364302	0.617	NA	NA	NA	NA	0.000360247	0.51	0.000500312	0.358
ON-Marg household & dwellings	3776	Ontario marginalisation indices	0.000549319	0.111	NA	NA	NA	NA	NA	NA	NA	NA	NA	NA	NA	NA	NA	NA	0.000566416	0.118	NA	NA	NA	NA	NA	NA	NA	NA	NA	NA
ON-Marg material resources			0.000989452	0.029	NA	NA	NA	NA	NA	NA	NA	NA	NA	NA	NA	NA	NA	NA	0.000251823	0.275	NA	NA	NA	NA	NA	NA	NA	NA	NA	NA
ON-Marg age & labour			8.56819e-05	0.707	NA	NA	NA	NA	NA	NA	NA	NA	NA	NA	NA	NA	NA	NA	3.36228e-05	0.538	NA	NA	NA	NA	NA	NA	NA	NA	NA	NA
On-Marg racialised & newcomer populations			0.00534627	0.001	NA	NA	NA	NA	NA	NA	NA	NA	NA	NA	NA	NA	NA	NA	1.88789e-05	0.055	NA	NA	NA	NA	NA	NA	NA	NA	NA	NA
Household income	1741	What the total income of the household is	0.000447068	0.467	NA	NA	NA	NA	NA	NA	NA	NA	NA	NA	NA	NA	NA	NA	NA	NA	NA	NA	NA	NA	NA	NA	NA	NA	NA	NA
Second parent/care-giver	2061	Whether the participant has a second parent/caregiver	2.64011e-05	0.952	NA	NA	NA	NA	NA	NA	NA	NA	NA	NA	NA	NA	NA	NA	NA	NA	NA	NA	NA	NA	NA	NA	NA	NA	NA	NA
HEFI	2978	Healthy Eating Food Index	0.00323169	0.001	NA	NA	NA	NA	NA	NA	NA	NA	NA	NA	NA	NA	NA	NA	NA	NA	NA	NA	0.000383535	0.602	NA	NA	0.000264104	0.752	0.000115088	0.895
Antibiotics		Antibiotics used (in last month/none)	0.00408438	0.001	NA	NA	NA	NA	NA	NA	NA	NA	NA	NA	NA	NA	NA	NA	NA	NA	NA	NA	0.00596191	0.001	NA	NA	0.00521311	0.001	NA	NA
Diet variety score (monthly)		Diet variety score (monthly): Number of food items consumed monthly	0.00179185	0.005	NA	NA	NA	NA	NA	NA	NA	NA	NA	NA	NA	NA	NA	NA	NA	NA	NA	NA	0.000173695	0.789	NA	NA	0.000152245	0.676	0.000340282	0.386
Diet variety score (weekly)		Diet variety score (weekly): Number of food items consumed weekly	0.00456788	0.001	NA	NA	NA	NA	NA	NA	NA	NA	NA	NA	NA	NA	NA	NA	NA	NA	NA	NA	0.000559518	0.951	NA	NA	0.000518494	0.987	0.000486453	0.993
Diet variety score (daily)		Diet variety score (daily): Number of food items consumed daily	0.000319574	0.393	NA	NA	NA	NA	NA	NA	NA	NA	NA	NA	NA	NA	NA	NA	NA	NA	NA	NA	0.000176454	0.79	NA	NA	0.000175889	0.357	0.000261338	0.47
Strict diet		Omnivore/vegetarian/vegan	0.000854507	0.225	NA	NA	NA	NA	NA	NA	NA	NA	NA	NA	NA	NA	NA	NA	NA	NA	NA	NA	0.000967497	0.541	NA	NA	0.00118345	0.791	0.001712	0.574
DSQ2		Probiotics/prebiotics/supplements	0.000157425	0.619	NA	NA	NA	NA	NA	NA	NA	NA	NA	NA	NA	NA	NA	NA	NA	NA	NA	NA	0.000119678	0.508	NA	NA	6.69031e-05	0.625	0.000235358	0.593
DSQ4		Whole grains	0.000820698	0.099	NA	NA	NA	NA	NA	NA	NA	NA	NA	NA	NA	NA	NA	NA	NA	NA	NA	NA	0.000285155	0.546	NA	NA	0.000216876	0.792	0.000100286	0.885
DSQ5		Refined grains	0.000406151	0.282	NA	NA	NA	NA	NA	NA	NA	NA	NA	NA	NA	NA	NA	NA	NA	NA	NA	NA	0.000244525	0.644	NA	NA	0.000114188	0.814	8.25098e-05	0.858
DSQ6		Dairy milk	0.00071268	0.15	NA	NA	NA	NA	NA	NA	NA	NA	NA	NA	NA	NA	NA	NA	NA	NA	NA	NA	0.00108413	0.092	NA	NA	0.00245878	0.051	0.00217101	0.098
DSQ7		Dairy yoghurt	0.000662315	0.152	NA	NA	NA	NA	NA	NA	NA	NA	NA	NA	NA	NA	NA	NA	NA	NA	NA	NA	0.000714555	0.838	NA	NA	0.000410187	0.779	0.0007584	0.727
DSQ8		Dairy cheese	0.00134773	0.013	NA	NA	NA	NA	NA	NA	NA	NA	NA	NA	NA	NA	NA	NA	NA	NA	NA	NA	4.72559e-05	0.937	NA	NA	0.000148204	0.87	0.000169448	0.915
DSQ9		Non-dairy milk/yoghurt/cheese	0.000566321	0.203	NA	NA	NA	NA	NA	NA	NA	NA	NA	NA	NA	NA	NA	NA	NA	NA	NA	NA	0.000242374	0.253	NA	NA	7.84594e-05	0.461	7.7651e-05	0.924
DSQ10		Soda/sugary drinks	0.0113385	0.001	NA	NA	NA	NA	NA	NA	NA	NA	NA	NA	NA	NA	NA	NA	NA	NA	NA	NA	0.00155487	0.185	NA	NA	0.00138538	0.452	0.00125397	0.665
DSQ11		Fruit juices	0.0057771	0.001	NA	NA	NA	NA	NA	NA	NA	NA	NA	NA	NA	NA	NA	NA	NA	NA	NA	NA	0.000929164	0.42	NA	NA	0.000664823	0.737	0.00054011	0.854
DSQ12		Coffee or tea	0.00396902	0.001	NA	NA	NA	NA	NA	NA	NA	NA	NA	NA	NA	NA	NA	NA	NA	NA	NA	NA	0.000388887	0.761	NA	NA	0.000602826	0.658	0.00067843	0.602
DSQ13		Fruit	0.00196204	0.004	NA	NA	NA	NA	NA	NA	NA	NA	NA	NA	NA	NA	NA	NA	NA	NA	NA	NA	0.000292478	0.709	NA	NA	0.000257498	0.707	0.000105102	0.803
DSQ14		Vegetables	0.00102279	0.043	NA	NA	NA	NA	NA	NA	NA	NA	NA	NA	NA	NA	NA	NA	NA	NA	NA	NA	0.000353893	0.397	NA	NA	0.000279206	0.705	0.000200338	0.877
DSQ15		Beans/legumes	6.66613e-05	0.816	NA	NA	NA	NA	NA	NA	NA	NA	NA	NA	NA	NA	NA	NA	NA	NA	NA	NA	6.77017e-05	0.425	NA	NA	5.40694e-05	0.619	3.22354e-06	0.96
DSQ16		Red meat	0.000523055	0.23	NA	NA	NA	NA	NA	NA	NA	NA	NA	NA	NA	NA	NA	NA	NA	NA	NA	NA	0.000409733	0.052	NA	NA	0.000415557	0.101	0.00041154	0.201
DSQ17		Processed meat	0.00134465	0.023	NA	NA	NA	NA	NA	NA	NA	NA	NA	NA	NA	NA	NA	NA	NA	NA	NA	NA	0.000265311	0.536	NA	NA	8.56545e-05	0.727	4.31523e-05	0.877
DSQ18		Poultry	8.49444e-05	0.792	NA	NA	NA	NA	NA	NA	NA	NA	NA	NA	NA	NA	NA	NA	NA	NA	NA	NA	0.00065122	0.517	NA	NA	0.000877665	0.588	0.000540911	0.604
DSQ19		Fish/seafood	0.00242618	0.001	NA	NA	NA	NA	NA	NA	NA	NA	NA	NA	NA	NA	NA	NA	NA	NA	NA	NA	0.000720637	0.427	NA	NA	0.000870162	0.364	0.00083628	0.519
DSQ20		Eggs	0.000993123	0.06	NA	NA	NA	NA	NA	NA	NA	NA	NA	NA	NA	NA	NA	NA	NA	NA	NA	NA	0.000104001	0.556	NA	NA	0.000227195	0.497	0.000293867	0.26
DSQ21		Tofu/soy	0.00157582	0.002	NA	NA	NA	NA	NA	NA	NA	NA	NA	NA	NA	NA	NA	NA	NA	NA	NA	NA	7.99771e-05	0.778	NA	NA	0.000112421	0.766	1.80756e-05	0.711
DSQ22		Desserts/sweets	0.00835582	0.001	NA	NA	NA	NA	NA	NA	NA	NA	NA	NA	NA	NA	NA	NA	NA	NA	NA	NA	0.00196104	0.412	NA	NA	0.00186159	0.532	0.00137107	0.75
DSQ23		Salty snacks	0.00410432	0.001	NA	NA	NA	NA	NA	NA	NA	NA	NA	NA	NA	NA	NA	NA	NA	NA	NA	NA	0.000128233	0.691	NA	NA	3.54379e-05	0.905	2.69766e-05	0.908
Social deprivation (school)	3272	Social deprivation	0.000704661	0.102	NA	NA	NA	NA	NA	NA	NA	NA	NA	NA	NA	NA	NA	NA	NA	NA	0.000262189	0.562	NA	NA	NA	NA	NA	NA	NA	NA
Material deprivation (school)		Material deprivation	0.000503223	0.191	NA	NA	NA	NA	NA	NA	NA	NA	NA	NA	NA	NA	NA	NA	NA	NA	5.19434e-05	0.711	NA	NA	NA	NA	NA	NA	NA	NA
Reside in GTA (school)		Living in the Greater Toronto Area	0.00403181	0.001	NA	NA	NA	NA	NA	NA	NA	NA	NA	NA	NA	NA	NA	NA	NA	NA	0.000236773	0.39	NA	NA	NA	NA	NA	NA	NA	NA
Index of rurality (school)		Living rurally	0.00507775	0.001	NA	NA	NA	NA	NA	NA	NA	NA	NA	NA	NA	NA	NA	NA	NA	NA	9.53903e-05	0.165	NA	NA	NA	NA	NA	NA	NA	NA
Greenspace (growing season mean) (school)		Greenspace in neighbourhood	0.00284713	0.001	NA	NA	NA	NA	NA	NA	NA	NA	NA	NA	NA	NA	NA	NA	NA	NA	0.000814181	0.036	NA	NA	NA	NA	NA	NA	NA	NA
PM2.5 (µg m-3) (school)		Particulate matter pollution levels	0.00466679	0.001	NA	NA	NA	NA	NA	NA	NA	NA	NA	NA	NA	NA	NA	NA	NA	NA	0.000595059	0.607	NA	NA	NA	NA	NA	NA	NA	NA
Social deprivation (utero)	2571	Social deprivation	0.00137891	0.033	NA	NA	NA	NA	NA	NA	NA	NA	NA	NA	NA	NA	NA	NA	NA	NA	0.00217165	0.175	NA	NA	NA	NA	NA	NA	NA	NA
Material deprivation (utero)		Material deprivation	0.00172837	0.01	NA	NA	NA	NA	NA	NA	NA	NA	NA	NA	NA	NA	NA	NA	NA	NA	0.00147062	0.037	NA	NA	NA	NA	NA	NA	NA	NA
Reside in GTA (utero)		Living in the Greater Toronto Area	0.00482078	0.001	NA	NA	NA	NA	NA	NA	NA	NA	NA	NA	NA	NA	NA	NA	NA	NA	0.000113697	0.521	NA	NA	NA	NA	NA	NA	NA	NA
Index of rurality (utero)		Living rurally	0.00683782	0.001	NA	NA	NA	NA	NA	NA	NA	NA	NA	NA	NA	NA	NA	NA	NA	NA	0.000130787	0.908	NA	NA	NA	NA	NA	NA	NA	NA
Greenspace (growing season mean) (utero)		Greenspace in neighbourhood	0.00447588	0.001	NA	NA	NA	NA	NA	NA	NA	NA	NA	NA	NA	NA	NA	NA	NA	NA	0.00102795	0.659	NA	NA	NA	NA	NA	NA	NA	NA
PM2.5 (µg m-3) (utero)		Particulate matter pollution levels	0.00326197	0.001	NA	NA	NA	NA	NA	NA	NA	NA	NA	NA	NA	NA	NA	NA	NA	NA	0.000319694	0.21	NA	NA	NA	NA	NA	NA	NA	NA
