# Supplementary material for: Population-based characterisation of child and adolescent oral microbiomes
Source: Research Square preprint supplement (doi:10.21203/rs.3.rs-8378803/v1), 2025-12-18
Supplement: Supplementary file 4 [file 79698adf189010ad268e1f83.docx]

**Supplementary text**

**Results**

***The most prevalent taxa in children and adolescents are similar to those found in adults***We compared these results with adults in the Atlantic PATH cohort (*n*=1,598, age 35-70 years) that we have published previously 1–5 (see Methods for further details), and found that in adults, again, no ASVs were present in 100% of participants and only two were present in ≥99% of participants, but the lowest classifications obtained for these matched ASVs found in ≥99% of children and adolescents (*i.e.*, *Granulicatella adiacens* and *Streptococcus*; Fig. S7). There were also fewer genera present in 100% or ≥99% of adults, with only *Veillonella* present in 100% of adults and *Streptococcus*, *Prevotella*, *Granulicatella*, *Haemophilus*, *Fusobacterium*, and *Neisseria* all present in ≥99% of adults. However, the other genera that were present in ≥99% of children and adolescents were all still present in high abundances in adults: *Rothia* (98.06%), *Alloprevotella* (96.62%), *Gemella* (98.94%), *Porphyromonas* (97.50%), and *Oribacterium* (94.81%; Fig. S7).

***Some of the genera that are significantly differentially abundant with age in children and show similar patterns in adults***
While this was not the case for all genera, interestingly, some of these them followed similar patterns in adults (Fig. S9); (i) *Megasphaera* increased in mean relative abundance from 0.31% in 5-year-olds to 0.74% in 16-year-olds, and was more abundant again in adults, ranging between 1.8% in 35-40-year-olds to 1.5% in >65-year-olds; (ii) *Neisseria* decreased from 18% in 5-year-olds to 11% in 16-year-olds, and was less abundant again in adults, ranging between 11% in 35-40-year-olds to 15% in >65-year-olds; (iii) *Gemella* decreased from 4.6% in 5-year-olds to 2.5% in 16-year-olds, and was less abundant again in adults, ranging between 1.2% in 35-40-year-olds to 1.6% in >65-year-olds; and (iv) *Cloacibacterium* decreased from 0.63% in 5-year-olds to 0.24% in 16-year-olds, and was less abundant again in adults, ranging between 0.80% in 35-40-year-olds to 0.02% in >65-year-olds, however, it is worth noting that this pattern in *Cloacibacterium* may be driven by prevalence, as it is present in only 51% of children and 11% of adults (the other genera mentioned for patterns in children and adults are present in >80% of both children and adults). Note that we give the abundance in 16-year-olds as the highest age group due to the small sample size in 17- and 18-year-olds.

***Measures of deprivation have little association with the saliva microbiome in children and adolescents***Ontario marginalisation indices (ON-Marg) for household and dwellings, material resources, age and labour force, and racialized and newcomer populations (*n*=3,805). The ON-Marg indices are calculated based on seven, six, three, or two census variables, respectively, where higher values indicate higher levels of marginalisation. Median values within our cohort are -0.41, -0.41, -0.42, and 0.23, respectively, indicating low levels of marginalisation.

For a smaller subset of participants (*n*=2,571) we also had these variables for where the participants currently went to school and where they resided in-utero (Table S1); patterns were very similar to those observed for variables based on where participants currently live, and the strongest associations were again with *Lactococcus* (current and school GTA/index of rurality) and Bacteroidetes [G-3] (current and in-utero PM2.5) in addition to *Bifidobacterium* (negatively associated with in-utero material deprivation index) and Pasturellaceae (negatively associated with school greenspace; Fig. S13 and Tables S2, S3 and S6). We also investigated the Ontario Marginalisation Index variables (ON-Marg household & dwellings, ON-Marg material resources, ON-Marg age & labour, and ON-Marg racialised & newcomer populations) instead of the material and social deprivation indices in the participants these were available for (*n*=3,776) and found that none were significantly associated with alpha or beta diversity in multivariate models, although significant positive associations between *Pseudomonas* and the ON-Marg age & labour and *Lacticaseibacillus* and ON-Marg material resources and a negative association between Clostridiales [F-1][G-1] and ON-Marg racialised & newcomer populations were identified (Fig. S14 and Tables S2, S3 and S6). We next examined the individual-level information on household income, and whether participants had a second parent/caregiver. The median annual household income within these participants was $100,000-199,000, Table S1). We had information on whether participants had a second parent/caregiver for 2,061 participants, 87% of which (n=1,785) indicated that they did. Due to the smaller numbers of participants with this individual-level information (n=1,741-2,061), we only performed univariate statistical tests for alpha and beta diversity associations and did not include them in the analyses that included other metadata variables. Neither variable had a significant association with any of the alpha or beta diversity metrics tested (Tables S2, S3 and S6).

***Overview of diet in the Spit for Science microbiome cohort***A subset of participants (*n*=2,978) also answered an additional questionnaire that included 23 questions, most of which (*n*=20) required them to say how many times in the past month they had eaten a variety of different foods. These had nine different answers possible, ranging from never to two or more times per day. The other questions asked to this subset of participants included whether they were a strict vegetarian or vegan, as well as how often they took probiotics, prebiotics or food supplements, or how often they have taken prescription antibiotics (Fig. S16 and Table S1). We also calculated both a Healthy Eating Index and a weekly diet variety score. The Healthy Eating Index was adapted from *Hewawitharana* *et al*. 6 and indicates adherence to healthy eating guidelines, with a higher value indicating higher adherence. Participants’ answers to 18 of the 20 food-related questions were used (Table S1). The Healthy Eating Index may take any value between 0-60, and values within this cohort ranged between 6.74 and 51.04 (median 35.79; Fig. 1C). The weekly diet variety score is simply a count of the number of different food items that the participants indicated that they consumed at least once per week (using only the food items included in the Healthy Eating Index). Values for the diet variety score could therefore take any value between 0-18, and values within this cohort ranged between 0 and 18 (median 14). When we look in the subset of participants that answered the diet questionnaire (*n*=2,978), age, ethnicity, and gender still have significant associations with beta diversity – although the effect sizes are smaller – while the presence of a diagnosed health condition is no longer significant. When we also include diet variables, ethnicity is no longer significant, and the effect sizes of all of these variables are smaller again (Table S2). Associations with alpha diversity remain similar, although gender is no longer significantly associated with Simpson’s evenness or diversity, age is no longer significantly associated with observed taxa, and diagnosed health condition becomes significant with Shannon diversity (Table S3).

Although the diet variables were collected with the intent of examining their associations with the microbiome, we were initially curious to see whether the diet variables (*n*=22; *i.e.*, answers to the 20 questions on frequency of consumption, the Healthy Eating Index and weekly diet richness) were associated with age, ethnicity, gender, or diagnosed health condition. All variables aside from dairy milk consumption were significantly associated with ethnicity (ANOVA *p* £ 0.05) and 15, 6 and 8 of the 22 examined variables were significantly associated with age, gender, and diagnosed health condition, respectively. Only fruit consumption was significantly associated with ethnicity, age, gender, and diagnosed health condition (Table S8). As ethnicity was significantly associated with the most variables, we examined the most frequent answer as well as the median answer given for each diet question within each of the ethnicity groups (Fig. S15). Some differences observed here are that: (i) beans/legumes are consumed more frequently by South Asian (median 3-4 times per week) than East Asian or White participants (median once per week); (ii) red meat and processed meat are consumed less frequently by South Asian (most frequent answer never for both) than East Asian or White participants (2-4 times per week); (iii) fish/seafood is consumed more frequently by East Asian (median twice per week) than South Asian or White participants (median 2-3 times per month); (iv) tofu/soy is consumed more frequently by East Asian (median once per week) than South Asian or White participants (median never).

***Antibiotic use has a significant impact on the salivary microbiome of children and adolescents***
Of the 2,978 participants that answered the question on whether they had taken antibiotics or not, 201 (6.75%) indicated that they had taken antibiotics within the last month. There were significant associations between antibiotic use and phylogenetic-RPCA beta diversity (R2 = 0.0041 and R2 = 0.0060, for univariate and multivariate analyses, respectively) and alpha diversity; all richness metrics as well as Shannon diversity were significantly decreased in those that had taken antibiotics in the last month *vs* those that hadn’t (Fig. 1AB and S16). Four genera were differentially abundant with antibiotic use: *Lautropia*, *Abiotrophia* and *Mitsuokella* were more abundant in those that had taken antibiotics in the last month *vs* those that hadn’t, while *Colibacter* showed the opposite. Both *Mitsuokella* and *Colibacter* were very low in prevalence in both groups (present in 7% and 0.8% of participants that hadn’t taken antibiotics and 7.2% and 0.75% of participants that had taken antibiotics, respectively). While most that had taken antibiotics within the last month cluster within those that hadn’t, one participant that had taken antibiotics groups away from all others on the PCA plot (Fig. S16). This participant was a white female who was 10 years old and did not indicate having been diagnosed with any physical health conditions or psychiatric/neurodevelopmental disorders (Figs. S2-S5).

Due to the unbalanced group sizes between those that had or hadn’t taken antibiotics within the last month, we also performed a sensitivity analysis where we ran PERMANOVA tests on the phylogenetic-RPCA distances using participants that had complete metadata for all demographic and diet variables as well as had given a Postal Code (*n*=2,594). We performed these both with (*n*=2,594) and without (*n*=2,426) participants that had taken antibiotics. When participants that had taken antibiotics were included, the results were similar to those seen in the full cohort, with significant associations being observed with antibiotic use, age, gender, and greenspace. Notably, ethnicity and diagnosed health condition were no longer significant, although this could be due to the reduced sample size. The proportions of participants within different ethnicity groups also shifts in this reduced cohort, from 23, 14 and 63% East Asian, South Asian and White, respectively, to 31, 17, and 52%, respectively. When participants that had taken antibiotics were removed, greenspace was no longer significant, although the effect sizes for the significant variables remained similar.

**Discussion**

We find that *Prevotella*, *Granulicatella*, *Megasphaera*, *Streptococcus*, *Veillonella*, *Gemella*, *Oribacterium*, and *Cloacibacterium* are more abundant in White than either East Asian or South Asian participants, while the reverse is true for *Porphyromonas*, *Aggregatibacter*, *Neisseria* and *Capnocytophaga*. A previous study that explored differences in the oral microbiome according to race/ethnicity in adults identified only Operational Taxonomic Units (OTUs) within *Alloprevotella* (Prevotellaceae) as DA between White and Asian participants, although this included only 282 participants in total 11; our previous study in adults did not examine differences due to race or ethnicity 3. Another previous study examining the sub-gingival plaque microbiome in adults also reported that *Prevotella* were associated with White participants while *Capnocytophaga* and *Porphyromonas* were associated with Chinese (*i.e.*, East Asian) participants 12. Unfortunately, in this cohort we were limited to including participants for which DNA extractions had already been performed on their saliva samples and this meant including only participants that were of East Asian, South Asian, or White ethnicity, preventing analyses that look across a wider range of ethnic or racial groups.

Gender was significantly associated with beta diversity as well as evenness and Simpson’s index of diversity, but not any measures of richness (Figs. 1 and S4). Both evenness and Simpson’s index of diversity were significantly higher in females than males, although the magnitude of differences was minor. Conversely, two previous studies reported higher diversity in males than females in saliva in children (using Inverse Simpson’s Index 13, Chao1 richness and Fisher’s alpha 14) and nasopharyngeal samples in children and young adults (using the Shannon Index 8), although several of the other large oral microbiome studies in children and adolescents do not report on sex or gender differences in alpha diversity 15,16 and our previous study in adults did not find significant associations between sex and alpha diversity 3. Four of the abundant genera that were DA with age were also DA with gender, with *Gemella*, *Haemophilus*, and *Neisseria* being more abundant in males than females while *Prevotella* is more abundant in females than males on average, but these trends appear to reverse in the oldest age groups where our sample size is limited (Figs. 2 and S9). Interestingly, ASVs classified as *Gemella*, *Haemophilus* and *Neisseria* were identified as being significantly more abundant in male than female 10–14-year-olds by Odendaal *et al.* in nasopharyngeal – but not saliva/oropharyngeal – samples 8 while OTUs classified as *Haemophilus* and *Neisseria* were identified as being significantly more abundant in female than male 11–14-year-olds by Raju *et al.* in saliva samples 13. We did not collect information on whether participants had gone through puberty, and – to our knowledge – there are no previous studies that characterise the saliva microbiome that do have this information; future research should aim to determine whether these differences are due to the onset of puberty or other associated hormonal changes.

There appeared to be some trends in microbial composition between males, females and trans/gender-diverse participants, but due to the small number of participants in this cohort that identify as trans/gender-diverse (*n*=21 [0.4%]), we were unable to draw robust conclusions. While this proportion is similar to the proportion reported in the 2019 Canadian Health Survey on youth aged 12-17 years (0.2% nonbinary and 0.2% transgender) 17, we do note that other estimates of the proportion of the adolescent population who identify as trans/gender-diverse are as high as 9.2% 18. Future studies should aim to sample a larger number of trans/gender-diverse participants.

We used broad groupings to characterise participants as having received a physical health diagnosis, a psychiatric/neurodevelopmental disorder diagnosis, both physical and psychiatric/neurodevelopmental disorder diagnoses, or no diagnosis and found significant beta diversity and richness differences across groups (Figs. 1 and S5), with these associations generally being in the order of no diagnosed condition > physical health condition > psychiatric/neurodevelopmental disorder > physical health condition and psychiatric/neurodevelopmental disorder. This suggests that there are larger shifts in the oral microbiome with psychiatric/neurodevelopmental disorders than physical health, similar to what we found in our adult cohort where more mental health than physical health-related components of a frailty index were significantly associated with the oral microbiome 1. There has been more research to date on associations between the gut microbiome and both physical and mental health – the oral and gut microbiomes are distinct but directly connected and oral microbes are known to play roles in gut diseases 19 – but there are also now several studies linking shifts in the oral microbiome in children and young adults with mental health disorders such as autism 15, depression 20, and anxiety 21. Interestingly, we only identified four genera as DA with diagnosed health conditions, all of which were detected between those with a psychiatric/neurodevelopmental disorder diagnosis or those with both psychiatric/neurodevelopmental disorder and physical health diagnoses and those with no diagnosis (Fig. S5). The coarse lens with which we have examined these diagnoses here – with many different conditions being grouped to simply psychiatric/neurodevelopmental disorder or physical health – likely contributes to this, and future research should examine these conditions individually. Although diagnosis information in this study is based on participants’ self-reporting that they have received a diagnosis from a professional, rates of diagnosis within this cohort are generally comparable to epidemiological studies.

A subset of the participants within this cohort (*n*=2,978) had answered an additional questionnaire where they gave information on the frequency with which they consume certain food items. This also allowed us to calculate a Healthy Eating Index and diet variety scores (see Methods). Of the 22 diet variables tested, 15, 20, 6 and 8 were significantly associated with age, ethnicity, gender and diagnosed health condition, respectively (Table S8), mainly reflecting the magnitude of oral microbiome differences attributed to each of these variables (Fig. 1). The drop in the proportion of oral microbiome variation explained by ethnicity and age, as well as the loss of significance of ethnicity discussed above, between analyses that don’t or do include diet variables suggests that much of the variation attributed to ethnicity and some of the variation attributed to age could be due to dietary differences. Further studies that include additional ethnic/racial groups should aim to validate these findings in other cohorts.

**References**

1. DeClercq, V., Wright, R. J., Nearing, J. T. & Langille, M. G. I. Oral microbial signatures associated with age and frailty in Canadian adults. *Sci Rep* 14, (2024).

2. DeClercq, V., Wright, R. J., van Limbergen, J. & Langille, M. G. I. Characterization of the salivary microbiome of adults with inflammatory bowel disease. *J Oral Microbiol* 17, (2025).

3. Nearing, J. T., DeClercq, V., Limbergen, J. Van & Langille, M. G. I. Assessing the variation within the oral microbiome of healthy adults. *mSphere* 1–20 (2020) doi:10.18372/0370-2197.86.14492.

4. Nearing, J. T., DeClercq, V. & Langille, M. G. I. Investigating the oral microbiome in retrospective and prospective cases of prostate, colon, and breast cancer. *NPJ Biofilms Microbiomes* 9, (2023).

5. DeClercq, V., Nearing, J. T. & Langille, M. G. Investigation of the impact of commonly used medications on the oral microbiome of individuals living without major chronic conditions. *PLoS One* 1–19 (2021) doi:10.1371/journal.pone.0261032.

6. Hewawitharana, S. C. *et al.* Comparison of the NHANES dietary screener questionnaire to the Automated Self-Administered 24-Hour Recall for Children in the Healthy Communities Study. *Nutr J* 17, (2018).

7. Burcham, Z. M. *et al.* Patterns of Oral Microbiota Diversity in Adults and Children: A Crowdsourced Population Study. *Sci Rep* 10, (2020).

8. Odendaal, M. L. *et al.* Host and environmental factors shape upper airway microbiota and respiratory health across the human lifespan. *Cell* 187, 4571-4585.e15 (2024).

9. Lif Holgerson, P., Esberg, A., Sjödin, A., West, C. E. & Johansson, I. A longitudinal study of the development of the saliva microbiome in infants 2 days to 5 years compared to the microbiome in adolescents. *Sci Rep* 10, 9629 (2020).

10. Kado, I., Hisatsune, J., Tsuruda, K., Tanimoto, K. & Sugai, M. The impact of fixed orthodontic appliances on oral microbiome dynamics in Japanese patients. *Sci Rep* 10, (2020).

11. Renson, A. *et al.* Sociodemographic variation in the oral microbiome. *Ann Epidemiol* 35, 73-80.e2 (2019).

12. Mason, M. R., Nagaraja, H. N., Camerlengo, T., Joshi, V. & Kumar, P. S. Deep Sequencing Identifies Ethnicity-Specific Bacterial Signatures in the Oral Microbiome. *PLoS One* 8, (2013).

13. Raju, S. C. *et al.* Gender-specific associations between saliva microbiota and body size. *Front Microbiol* 10, (2019).

14. Kuhn, L. *et al.* Microbiota in the oral cavity of school-age children with HIV who started antiretroviral therapy at young ages in South Africa. *AIDS* 37, 1583–1591 (2023).

15. Manghi, P. *et al.* Large-scale metagenomic analysis of oral microbiomes reveals markers for autism spectrum disorders. *Nature Communications* 15, (2024).

16. Willis, J. R. *et al.* Citizen science charts two major “stomatotypes” in the oral microbiome of adolescents and reveals links with habits and drinking water composition. *Microbiome* 6, (2018).

17. Wang, C. *et al.* Gender identity and sexual attraction among Canadian youth: findings from the 2019 Canadian Health Survey on Children and Youth. *Health Promotion and Chronic Disease Prevention in Canada* 43, 299–305 (2023).

18. Kidd, K. M. *et al.* Prevalence of gender-diverse youth in an urban school district. *Pediatrics* 147, (2021).

19. Kunath, B. J., De Rudder, C., Laczny, C. C., Letellier, E. & Wilmes, P. The oral–gut microbiome axis in health and disease. *Nature Reviews Microbiology* vol. 22 791–805 Preprint at https://doi.org/10.1038/s41579-024-01075-5 (2024).

20. Wingfield, B. *et al.* Variations in the oral microbiome are associated with depression in young adults. *Sci Rep* 11, (2021).

21. Li, C. *et al.* A genetic association study reveals the relationship between the oral microbiome and anxiety and depression symptoms. *Front Psychiatry* (2022).
