# Supplementary material for: Population-based characterisation of child and adolescent oral microbiomes
Source: Research Square preprint supplement (doi:10.21203/rs.3.rs-8378803/v1), 2025-12-18
Supplement: Supplementary file 5 [file ae6ca07296788e54b7f46835.xlsx]

## Sheet: Sheet1
Table S3. ANOVA (left) and Tukeys HSD (right) tests for associations between alpha diversity metrics and all metadata variables. Cells coloured in red indicate significant p-values (p ≤ 0.05).
Variable name	n	Variable description	Chao1 richness														Faith's phylogenetic diversity														Observed taxa														Shannon diversity
			Univariate		Basic variables		Marginalisation variables		Marginalisation variables ON-Marg		Diet variables		All variables		All variables no antibiotics users		Univariate		Basic variables		Marginalisation variables		Marginalisation variables ON-Marg		Diet variables		All variables		All variables no antibiotics users		Univariate		Basic variables		Marginalisation variables		Marginalisation variables ON-Marg		Diet variables		All variables		All variables no antibiotics users		Univariate		Basic variables		Marginalisation variables
			F	p	F	p	F	p	F	p	F	p	F	p	F	p	F	p	F	p	F	p	F	p	F	p	F	p	F	p	F	p	F	p	F	p	F	p	F	p	F	p	F	p	F	p	F	p	F
Gender	4812	Male/female/non-binary or trans	1.55512	0.21127	0.891781	0.410011	1.97217	0.139319	2.02561	0.132093	0.492369	0.611246	0.714973	0.489341	0.862885	0.422121	0.0983456	0.906337	0.00301058	0.996994	0.319566	0.726487	0.353115	0.702526	0.308076	0.734892	0.0940625	0.91023	0.0615406	0.940317	0.936188	0.392191	0.399205	0.670881	0.915573	0.400389	0.826931	0.437489	0.0630165	0.93893	0.173633	0.840619	0.291274	0.747347	2.66232	0.0698891	1.77787	0.169139	1.19292
Age		Age	31.2448	2.40006e-08	14.2175	0.000165324	12.6218	0.000386621	9.68599	0.00187422	5.37596	0.0205103	3.36277	0.0668464	1.64438	0.199894	16.6171	4.6476e-05	5.58841	0.0181297	5.22133	0.0223748	3.5715	0.0588753	4.78041	0.0288937	2.79055	0.0949909	1.42187	0.233256	21.7839	3.13441e-06	7.72698	0.00546687	7.14676	0.00754701	4.93713	0.0263598	3.10719	0.0780905	1.84075	0.175028	0.59345	0.441191	3.94902	0.0469553	10.5008	0.00120352	11.414
Ethnicity		White/East Asian/South Asian	52.925	1.83764e-23	52.806	2.3927e-23	46.1675	1.68107e-20	42.4124	6.84735e-19	39.4492	1.50259e-17	35.3181	8.85638e-16	30.0929	1.40835e-13	68.4358	4.94099e-30	65.9088	7.25209e-29	55.442	2.08081e-24	51.0961	1.50655e-22	47.0107	1.04928e-20	39.5036	1.58579e-17	34.9783	1.26606e-15	29.0664	2.83339e-13	28.575	4.81105e-13	24.998	1.67907e-11	22.7336	1.5879e-10	26.3832	4.80174e-12	23.6675	7.09084e-11	19.0411	6.5844e-09	0.194565	0.823199	0.0469811	0.954106	0.0638195
Physical/mental health condition		(None/physical condition/mental condition/physical & mental condition)	4.70743	0.00276817	3.52328	0.0143819	1.45307	0.225407	1.4792	0.218155	3.52924	0.0143329	1.73809	0.157163	1.455	0.225045	6.48629	0.000223655	3.84153	0.00927041	1.88905	0.1292	2.02389	0.108417	3.11416	0.0252764	1.45124	0.226088	1.69029	0.167098	2.85428	0.0358135	1.98737	0.11366	0.636524	0.591442	0.773662	0.50861	2.45759	0.0612183	1.09436	0.350289	1.10823	0.344522	2.78811	0.0391653	1.18908	0.312299	0.560792
Social deprivation (current)	4178	Social deprivation	0.0781958	0.779771	NA	NA	5.69141	0.0171044	NA	NA	NA	NA	6.15647	0.0131816	5.82309	0.0159184	0.36309	0.546828	NA	NA	3.00199	0.0832561	NA	NA	NA	NA	3.18296	0.0745739	2.68607	0.101407	0.0414209	0.838738	NA	NA	3.14123	0.0764287	NA	NA	NA	NA	2.74953	0.0974524	2.30195	0.129391	0.0126361	0.910504	NA	NA	0.0745827
Material deprivation (current)		Material deprivation	6.89957	0.00865293	NA	NA	0.404018	0.525066	NA	NA	NA	NA	0.0739112	0.785755	0.00413393	0.948742	5.89765	0.0152028	NA	NA	0.0796879	0.777739	NA	NA	NA	NA	0.307957	0.579004	0.524546	0.469005	3.91887	0.0478119	NA	NA	0.228027	0.633022	NA	NA	NA	NA	0.03684	0.847812	0.00413658	0.948726	0.357549	0.549903	NA	NA	0.25048
Reside in GTA (current)		Living in the Greater Toronto Area	19.2329	1.18526e-05	NA	NA	3.14572	0.0762189	4.68487	0.0305078	NA	NA	0.55252	0.457384	1.70311	0.192052	39.5784	3.47258e-10	NA	NA	9.94973	0.00162322	13.142	0.000293535	NA	NA	3.23055	0.0724396	5.14213	0.0234724	21.7518	3.19915e-06	NA	NA	7.17278	0.00743853	8.08202	0.00450081	NA	NA	2.5436	0.110913	4.23392	0.0397704	11.7726	0.000606855	NA	NA	8.0717
Index of rurality (current)		Living rurally	41.1166	1.59242e-10	NA	NA	17.3877	3.12645e-05	16.2038	5.82833e-05	NA	NA	6.73795	0.00951304	5.75135	0.0165793	66.89	3.76475e-16	NA	NA	21.8793	3.02022e-06	15.9299	6.73021e-05	NA	NA	9.42454	0.00217215	8.59173	0.00342036	44.1924	3.3574e-11	NA	NA	18.7185	1.56004e-05	15.5709	8.12871e-05	NA	NA	7.00961	0.00817622	5.87885	0.0154237	30.9762	2.77477e-08	NA	NA	17.5797
Greenspace (growing season mean) (current)		Greenspace in neighbourhood	39.0314	4.58621e-10	NA	NA	7.58224	0.00592696	6.72666	0.00954429	NA	NA	3.45773	0.0631154	2.14306	0.143394	45.4292	1.79817e-11	NA	NA	6.80595	0.00912652	6.79713	0.00917558	NA	NA	5.50298	0.0190893	3.55518	0.0595241	35.5079	2.74918e-09	NA	NA	8.30717	0.00397444	7.90878	0.00495146	NA	NA	3.89966	0.0484443	2.37795	0.123238	8.35806	0.00385957	NA	NA	1.9436
PM2.5 (µg m-3) (current)		Particulate matter pollution levels	32.8152	1.08472e-08	NA	NA	0.556495	0.455729	0.392295	0.531143	NA	NA	1.16679	0.280202	1.04383	0.307073	49.8043	1.9797e-12	NA	NA	1.00102	0.317138	0.0115455	0.914439	NA	NA	1.42842	0.232176	1.19687	0.274097	32.2927	1.4164e-08	NA	NA	0.473547	0.491408	0.250305	0.616897	NA	NA	1.05776	0.303862	0.871134	0.350769	19.0697	1.2908e-05	NA	NA	1.34823
ON-Marg household & dwellings	3776	Ontario marginalisation indices	1.40336	0.236236	NA	NA	NA	NA	3.71036	0.0541699	NA	NA	NA	NA	NA	NA	1.06877	0.301289	NA	NA	NA	NA	3.35515	0.0670938	NA	NA	NA	NA	NA	NA	1.37443	0.241126	NA	NA	NA	NA	2.95037	0.0859607	NA	NA	NA	NA	NA	NA	0.821679	0.364747	NA	NA	NA
ON-Marg material resources			12.0661	0.000519201	NA	NA	NA	NA	3.49933	0.0614906	NA	NA	NA	NA	NA	NA	7.01354	0.00812297	NA	NA	NA	NA	1.10954	0.292267	NA	NA	NA	NA	NA	NA	6.7498	0.009412	NA	NA	NA	NA	1.74468	0.186648	NA	NA	NA	NA	NA	NA	1.64414	0.199836	NA	NA	NA
ON-Marg age & labour			0.176226	0.67466	NA	NA	NA	NA	0.0378776	0.845702	NA	NA	NA	NA	NA	NA	0.546128	0.45995	NA	NA	NA	NA	0.129682	0.718788	NA	NA	NA	NA	NA	NA	0.00374278	0.95122	NA	NA	NA	NA	0.00100343	0.974732	NA	NA	NA	NA	NA	NA	0.0024606	0.96044	NA	NA	NA
On-Marg racialised & newcomer populations			39.9125	2.96238e-10	NA	NA	NA	NA	0.277779	0.598199	NA	NA	NA	NA	NA	NA	50.4264	1.46974e-12	NA	NA	NA	NA	0.939588	0.332462	NA	NA	NA	NA	NA	NA	25.7215	4.13237e-07	NA	NA	NA	NA	0.900235	0.342795	NA	NA	NA	NA	NA	NA	0.97597	0.323259	NA	NA	NA
Household income	1741	What the total income of the household is	1.29058	0.256098	NA	NA	NA	NA	NA	NA	NA	NA	NA	NA	NA	NA	0.839259	0.359736	NA	NA	NA	NA	NA	NA	NA	NA	NA	NA	NA	NA	0.474906	0.490831	NA	NA	NA	NA	NA	NA	NA	NA	NA	NA	NA	NA	0.167443	0.682445	NA	NA	NA
Second parent/care-giver	2061	Whether the participant has a second parent/caregiver	1.04889	0.305883	NA	NA	NA	NA	NA	NA	NA	NA	NA	NA	NA	NA	1.03377	0.309394	NA	NA	NA	NA	NA	NA	NA	NA	NA	NA	NA	NA	0.0416874	0.838237	NA	NA	NA	NA	NA	NA	NA	NA	NA	NA	NA	NA	0.282921	0.594851	NA	NA	NA
HEFI	2978	Healthy Eating Food Index	1.87083	0.171483	NA	NA	NA	NA	NA	NA	2.60339	0.106784	1.6204	0.203196	1.95682	0.16203	1.50704	0.219688	NA	NA	NA	NA	NA	NA	1.00951	0.315135	0.843043	0.358648	0.459798	0.497807	0.617442	0.432062	NA	NA	NA	NA	NA	NA	1.21425	0.270617	0.779947	0.377272	1.09779	0.294895	0.0360048	0.849519	NA	NA	NA
Antibiotics		Antibiotics used (in last month/none)	16.0196	1.16374e-07	NA	NA	NA	NA	NA	NA	19.1552	1.26327e-05	11.764	0.000617138	NA	NA	13.4437	1.50569e-06	NA	NA	NA	NA	NA	NA	15.1567	0.000101991	8.93343	0.00283689	NA	NA	14.7112	4.27064e-07	NA	NA	NA	NA	NA	NA	16.727	4.47666e-05	8.98301	0.00276131	NA	NA	10.2096	3.76194e-05	NA	NA	NA
Diet variety score (monthly)		Diet variety score (monthly): Number of food items consumed monthly	5.54221	0.0186278	NA	NA	NA	NA	NA	NA	2.15315	0.142425	1.27346	0.259265	1.83527	0.17568	6.47389	0.0109972	NA	NA	NA	NA	NA	NA	1.78721	0.181409	0.443852	0.505352	0.847599	0.357358	6.12185	0.0134075	NA	NA	NA	NA	NA	NA	2.42973	0.119202	0.680292	0.409593	1.09779	0.294896	6.78821	0.00922187	NA	NA	NA
Diet variety score (weekly)		Diet variety score (weekly): Number of food items consumed weekly	1.44893	0.228795	NA	NA	NA	NA	NA	NA	0.69652	0.404049	0.83728	0.360295	0.532243	0.465762	0.140663	0.707649	NA	NA	NA	NA	NA	NA	0.281945	0.595484	0.0932385	0.760134	0.445352	0.504638	1.66191	0.197446	NA	NA	NA	NA	NA	NA	0.319213	0.57214	0.33914	0.560397	0.0485053	0.82571	1.81192	0.178381	NA	NA	NA
Diet variety score (daily)		Diet variety score (daily): Number of food items consumed daily	3.46123	0.0629221	NA	NA	NA	NA	NA	NA	2.5738	0.108795	1.24103	0.265417	1.57431	0.209748	1.30933	0.252609	NA	NA	NA	NA	NA	NA	2.05126	0.152227	1.23371	0.266832	2.2396	0.134694	3.40727	0.065009	NA	NA	NA	NA	NA	NA	3.46397	0.0628573	2.34936	0.125505	3.50597	0.0613131	0.964096	0.326237	NA	NA	NA
Strict diet		Omnivore/vegetarian/vegan	0.983313	0.399502	NA	NA	NA	NA	NA	NA	1.97285	0.115984	2.10721	0.0973548	2.06651	0.102704	0.302616	0.823531	NA	NA	NA	NA	NA	NA	2.07391	0.101644	1.63972	0.178208	1.60592	0.186048	2.23963	0.0815622	NA	NA	NA	NA	NA	NA	2.13731	0.0935343	1.97452	0.115785	1.8682	0.132933	5.60871	0.000777484	NA	NA	NA
DSQ2		Probiotics/prebiotics/supplements	0.0403215	0.840867	NA	NA	NA	NA	NA	NA	0.00828289	0.927493	0.104414	0.746632	0.244698	0.620895	0.171975	0.678392	NA	NA	NA	NA	NA	NA	0.00159731	0.968124	0.0956093	0.757199	0.138226	0.710095	0.715297	0.397759	NA	NA	NA	NA	NA	NA	0.541501	0.461892	0.221731	0.63778	0.145388	0.703029	1.37016	0.241879	NA	NA	NA
DSQ4		Whole grains	10.241	0.00138799	NA	NA	NA	NA	NA	NA	1.69537	0.193035	0.941368	0.332053	1.09492	0.295528	7.26033	0.00708904	NA	NA	NA	NA	NA	NA	4.55498	0.0329369	2.90726	0.0883498	2.79171	0.0949305	8.27471	0.00404871	NA	NA	NA	NA	NA	NA	2.41009	0.120704	1.40886	0.235398	1.40852	0.235462	3.02865	0.0819095	NA	NA	NA
DSQ5		Refined grains	0.350512	0.553869	NA	NA	NA	NA	NA	NA	0.000555918	0.981192	4.687e-05	0.994538	0.0673602	0.79525	0.385154	0.534905	NA	NA	NA	NA	NA	NA	0.1785	0.672708	0.0608857	0.805129	0.00217526	0.962806	0.0301278	0.862212	NA	NA	NA	NA	NA	NA	0.342333	0.558548	0.218588	0.640173	0.108023	0.742445	0.00288248	0.957187	NA	NA	NA
DSQ6		Dairy milk	0.241159	0.623406	NA	NA	NA	NA	NA	NA	0.0143501	0.904659	3.0622	0.0802988	2.99533	0.0836798	0.685035	0.407925	NA	NA	NA	NA	NA	NA	0.0450804	0.831877	3.49332	0.061775	3.3226	0.0685026	0.182466	0.669293	NA	NA	NA	NA	NA	NA	3.33037e-07	0.99954	3.05582	0.0806142	3.06808	0.0800174	0.887607	0.346203	NA	NA	NA
DSQ7		Dairy yoghurt	1.4489	0.2288	NA	NA	NA	NA	NA	NA	2.92279	0.0874825	2.05441	0.151935	2.6211	0.10563	0.938078	0.332851	NA	NA	NA	NA	NA	NA	2.94937	0.0860562	1.87283	0.171317	3.02606	0.082111	1.26757	0.260314	NA	NA	NA	NA	NA	NA	2.19853	0.13829	0.896383	0.343877	1.68828	0.193997	0.955811	0.328324	NA	NA	NA
DSQ8		Dairy cheese	5.6927	0.0170978	NA	NA	NA	NA	NA	NA	0.425367	0.514342	0.855752	0.355051	0.641867	0.423143	8.01058	0.00468167	NA	NA	NA	NA	NA	NA	0.746748	0.387605	1.21866	0.269768	1.16815	0.279929	4.55553	0.032894	NA	NA	NA	NA	NA	NA	0.402917	0.525655	0.881965	0.347787	0.70162	0.402353	0.0504551	0.822289	NA	NA	NA
DSQ9		Non-dairy milk/yoghurt/cheese	0.85824	0.354307	NA	NA	NA	NA	NA	NA	0.0631818	0.80156	0.0152183	0.901834	0.163619	0.685895	0.591622	0.441854	NA	NA	NA	NA	NA	NA	0.0200175	0.887501	0.126159	0.722489	0.00155456	0.968554	0.431379	0.511364	NA	NA	NA	NA	NA	NA	0.0590295	0.80806	0.0145593	0.903972	0.0788359	0.778914	0.00049928	0.982175	NA	NA	NA
DSQ10		Soda/sugary drinks	0.324379	0.569031	NA	NA	NA	NA	NA	NA	3.19155	0.0741619	4.44251	0.035189	5.3471	0.0208714	8.97498	0.0027596	NA	NA	NA	NA	NA	NA	8.80538	0.00303686	9.72661	0.00184419	10.6336	0.00113166	1.52484	0.216986	NA	NA	NA	NA	NA	NA	3.8705	0.0492712	4.77624	0.0289801	6.20647	0.0128197	5.67372	0.0172833	NA	NA	NA
DSQ11		Fruit juices	0.879008	0.34855	NA	NA	NA	NA	NA	NA	1.49288	0.221906	2.54645	0.110713	2.00122	0.157349	7.58625	0.00591727	NA	NA	NA	NA	NA	NA	3.28488	0.0700612	4.26357	0.0390771	3.37578	0.0663294	1.54609	0.213811	NA	NA	NA	NA	NA	NA	1.36555	0.242709	2.08477	0.148944	1.59369	0.206967	1.78496	0.181644	NA	NA	NA
DSQ12		Coffee or tea	5.39521	0.0202592	NA	NA	NA	NA	NA	NA	0.84264	0.358747	1.02676	0.311053	1.40442	0.236145	0.823716	0.364169	NA	NA	NA	NA	NA	NA	0.23218	0.629962	0.0574188	0.81065	0.000905995	0.975991	3.74714	0.0529926	NA	NA	NA	NA	NA	NA	0.58011	0.446353	0.845026	0.358083	1.12719	0.288521	0.0727517	0.78739	NA	NA	NA
DSQ13		Fruit	7.19536	0.00734963	NA	NA	NA	NA	NA	NA	0.25159	0.616009	0.0261572	0.871535	0.178981	0.672302	2.22128	0.136226	NA	NA	NA	NA	NA	NA	0.716213	0.397484	0.0138834	0.906217	0.0146004	0.903838	2.60076	0.106918	NA	NA	NA	NA	NA	NA	0.00182257	0.965951	0.331153	0.565051	0.809944	0.36826	0.50635	0.476779	NA	NA	NA
DSQ14		Vegetables	5.84458	0.0156848	NA	NA	NA	NA	NA	NA	4.11299	0.0426792	2.44512	0.118062	2.39227	0.122116	1.5765	0.209364	NA	NA	NA	NA	NA	NA	7.98259	0.0047669	5.10436	0.0239817	5.28404	0.0216381	3.44491	0.0635457	NA	NA	NA	NA	NA	NA	2.70594	0.100123	1.56276	0.21142	1.22747	0.268051	0.852373	0.355957	NA	NA	NA
DSQ15		Beans/legumes	4.45659	0.0348499	NA	NA	NA	NA	NA	NA	8.60494e-07	0.99926	0.0957874	0.75698	0.0270809	0.869307	6.8773	0.00877426	NA	NA	NA	NA	NA	NA	0.152615	0.696088	1.33403e-10	0.999991	0.135331	0.713012	3.51295	0.0609887	NA	NA	NA	NA	NA	NA	0.091932	0.761765	0.54725	0.459538	0.0830542	0.773234	0.946791	0.330617	NA	NA	NA
DSQ16		Red meat	7.20612	0.0073058	NA	NA	NA	NA	NA	NA	3.17179	0.0750626	3.91559	0.0479884	3.42553	0.0643626	6.1236	0.0133942	NA	NA	NA	NA	NA	NA	1.77483	0.182927	2.42875	0.119299	1.99681	0.157807	6.5101	0.0107759	NA	NA	NA	NA	NA	NA	2.07862	0.149522	1.96335	0.161323	1.93855	0.164001	3.2417	0.0718873	NA	NA	NA
DSQ17		Processed meat	0.474313	0.491063	NA	NA	NA	NA	NA	NA	6.9835	0.00828666	7.38333	0.0066445	4.14221	0.0419758	0.0885803	0.766011	NA	NA	NA	NA	NA	NA	11.1111	0.000872791	11.6599	0.000652397	6.69662	0.00973882	0.896967	0.343673	NA	NA	NA	NA	NA	NA	5.81627	0.0159626	7.09702	0.0077883	4.01019	0.0453787	3.00111	0.083311	NA	NA	NA
DSQ18		Poultry	0.00317874	0.955043	NA	NA	NA	NA	NA	NA	0.304031	0.581424	0.000667023	0.979398	0.206311	0.64973	0.0428363	0.836048	NA	NA	NA	NA	NA	NA	1.43159	0.231637	0.65451	0.418609	0.0220541	0.88196	0.102697	0.748639	NA	NA	NA	NA	NA	NA	0.210953	0.646068	0.00380609	0.950814	0.454639	0.500228	2.8396	0.0920718	NA	NA	NA
DSQ19		Fish/seafood	17.9203	2.37324e-05	NA	NA	NA	NA	NA	NA	0.574748	0.448462	0.98419	0.321296	1.02067	0.312499	26.9592	2.21777e-07	NA	NA	NA	NA	NA	NA	0.621626	0.430531	0.237993	0.625717	0.297485	0.585532	17.5985	2.8077e-05	NA	NA	NA	NA	NA	NA	1.14775	0.284142	0.857378	0.354594	1.09728	0.295008	10.3689	0.00129534	NA	NA	NA
DSQ20		Eggs	17.8975	2.40168e-05	NA	NA	NA	NA	NA	NA	1.33352	0.24831	1.3446	0.246374	1.2617	0.261482	26.6766	2.56369e-07	NA	NA	NA	NA	NA	NA	1.4108	0.235056	2.05122	0.152253	1.74938	0.186126	12.0275	0.000531657	NA	NA	NA	NA	NA	NA	0.426406	0.513828	0.326161	0.567998	0.270203	0.603261	1.56875	0.210488	NA	NA	NA
DSQ21		Tofu/soy	13.4478	0.000249588	NA	NA	NA	NA	NA	NA	0.37576	0.539947	0.06632	0.796801	0.652238	0.419423	24.4968	7.85758e-07	NA	NA	NA	NA	NA	NA	0.0488011	0.825184	0.0225548	0.880637	0.190711	0.662379	9.7397	0.00182059	NA	NA	NA	NA	NA	NA	0.239802	0.6244	0.0381993	0.845065	0.552337	0.457463	0.0389493	0.843563	NA	NA	NA
DSQ22		Desserts/sweets	30.6623	3.33811e-08	NA	NA	NA	NA	NA	NA	14.992	0.000111219	13.8428	0.000204688	9.9615	0.00162547	44.921	2.44438e-11	NA	NA	NA	NA	NA	NA	12.6545	0.000382834	11.2506	0.000812034	7.44335	0.00643025	24.4579	8.01661e-07	NA	NA	NA	NA	NA	NA	13.2906	0.00027313	11.3939	0.000752112	7.65719	0.00571367	3.42749	0.0642185	NA	NA	NA
DSQ23		Salty snacks	3.68715	0.0549288	NA	NA	NA	NA	NA	NA	1.23842	0.265902	1.68982	0.193787	1.66569	0.197006	17.171	3.51133e-05	NA	NA	NA	NA	NA	NA	2.08123	0.149266	2.13091	0.144525	2.05259	0.152124	2.6939	0.100839	NA	NA	NA	NA	NA	NA	1.32583	0.249677	1.92813	0.16513	1.92117	0.165902	0.169246	0.680813	NA	NA	NA
[truncated: 62 more columns]
