# Supplementary material for: Population-based characterisation of child and adolescent oral microbiomes
Source: Research Square preprint supplement (doi:10.21203/rs.3.rs-8378803/v1), 2025-12-18
Supplement: Supplementary file 6 [file dabc2598581b600262b7f8ed.xlsx]

## Sheet: Table S6A
Table S6A. Results for differential abundance tests carried out using MaAsLin3. See methods for full details. Cells coloured in red indicate significant q-values (q ≤ 0.1).
Note that MaAsLin3 does not calculate coefficients for categorical variables that do not have a reference group.
Genus	Age					Gender					Ethnicity					Physical/mental health condition					HEFI					Antibiotic use					Diet variety score monthly					Diet variety score weekly					Diet variety score daily					Strict diet
	Abundance		Joint	Prevalence		Abundance		Joint	Prevalence		Abundance		Joint	Prevalence		Abundance		Joint	Prevalence		Abundance		Joint	Prevalence		Abundance		Joint	Prevalence		Abundance		Joint	Prevalence		Abundance		Joint	Prevalence		Abundance		Joint	Prevalence		Abundance		Joint	Prevalence
	Coefficient	q-value	q-value	Coefficient	q-value	Coefficient	q-value	q-value	Coefficient	q-value	Coefficient	q-value	q-value	Coefficient	q-value	Coefficient	q-value	q-value	Coefficient	q-value	Coefficient	q-value	q-value	Coefficient	q-value	Coefficient	q-value	q-value	Coefficient	q-value	Coefficient	q-value	q-value	Coefficient	q-value	Coefficient	q-value	q-value	Coefficient	q-value	Coefficient	q-value	q-value	Coefficient	q-value	Coefficient	q-value	q-value	Coefficient
g__Granulicatella	-0.300449	5.9881e-07	3.82367e-07	-0.258006	0.733064		0.312314	0.397691		1		3.72567e-11	4.68097e-11		0.923499	-0.0322573	0.940778	0.98085	0.930668	0.896511	0.000836508	0.9901	0.988072	0.155623	0.962479	-0.235103	0.657889	0.798162	-1.24727	0.791591	-0.0152444	0.879222	0.462768	0.529364	0.353738	-0.0105732	0.899188	0.790914	0.429792	0.65625	-0.0255542	0.943488	0.984302	0.236205	0.936002		0.960009	0.997374
g__Sneathia	-0.410968	1.15683e-06	0	-0.554556	0		0.544485	0.682107		0.799577		0.0314442	1.56497e-15		1.2935e-15	0.152948	0.933323	0.973745	0.174049	0.334645	0.0223781	0.975793	0.996046	0.00788407	1	-0.446941	0.671582	0.410561	-0.71291	0.312158	-0.0107933	0.984138	0.999514	0.0112694	1	0.028132	0.981648	0.985608	0.0193558	0.973316	-0.00935338	1	0.932429	-0.0566417	0.814281		0.97309	0.499098
g__Megasphaera	0.319562	1.63818e-06	1.09352e-06	0.297101	0.0020508		0.95794	0.0356631		0.0281149		1.61582e-06	1.99047e-06		0.00396757	-0.0510886	0.933323	0.889709	0.177844	0.489867	-0.154761	0.0190851	0.0149069	-0.173313	0.0116112	0.03153	0.926819	0.689021	-0.594268	0.549571	0.0523818	0.855911	0.342591	0.119353	0.264596	0.110462	0.287788	0.0266861	0.164093	0.0208755	0.0132871	0.943488	0.938831	0.0348617	0.827643		0.928388	0.9672
g__Gemella	-0.270843	1.58734e-05	2.0036e-05	0.215942	0.940778		0.00238539	0.00299939		0.900556		8.2653e-06	1.04545e-05		0.725698	-0.0583438	0.897562	0.945904	1.21045	0.853707	-0.0637531	0.373575	0.482627	-0.292604	0.829998	-0.205444	0.791591	0.0017678	-2.91756	0.00133373	-0.0153976	0.902988	0.973511	-0.214585	0.937089	-0.0130035	0.893459	0.976086	-0.0920868	0.976147	-0.0507778	0.668123	0.805321	0.0144414	1		0.6181	0.749453
g__Lautropia	-0.238566	0.000767662	0.000525991	-0.302185			0.933323	0.930213				6.85289e-15	4.14557e-15			0.0936904	0.892457	0.878873	0.00140175		0.0734326	0.581927	0.535478	0.243538		0.515843	0.0104352	0.00756494	0.0841631		0.014947	1	0.994712	0.145972		0.0181285	0.993132	0.985608	0.144024		0.0107713	0.943488	0.943721	0.129848			0.783218	0.765993
g__Neisseria	-0.207007	0.0020508	0.00255334	-0.60041	0.0705214		0.000707211	0.000888214		0.97631		2.37894e-18	2.87823e-18		0.81176	-0.14801	0.467566	0.604711	1.15098	0.735053	0.0999836	0.135182	0.181067	0.219114	0.927153	0.10037	0.654809	0.794762	-1.31966	0.759904	-0.04232	0.578763	0.725696	0.0519371	0.99892	-0.0771714	0.11977	0.0877182	-0.0433448	0.995673	-0.0372032	0.844498	0.943721	0.389239	0.833457		0.596207	0.725656
g__Weeksellaceae_[G-1]	-0.218135	0.0020508	0.0013619	-0.239737			0.602056	0.525352				0.351769	0.29616			0.111654	0.871053	0.858687	-0.19466		-0.0110736	0.961924	0.95253	0.0283287		-0.170202	0.913638	0.908541	-0.525444		-0.0222449	0.868589	0.842074	-0.0556888		-0.0290249	0.797994	0.776419	-0.0853274		-0.0176611	0.987117	0.986575	-0.0260564			0.917062	0.899356
g__Haemophilus	0.206028	0.00232188	0.00157559	0.296877			0.751998	0.707216				6.06508e-15	3.669e-15			0.0303923	0.993769	0.989431	0.0107337		-0.0510329	0.600713	0.557592	-0.14293		0.0391945	0.87258	0.868233	-0.130021		0.0732969	0.540236	0.487658	0.130048		0.0947122	0.261462	0.208523	0.160407		0.0272993	0.781897	0.761493	0.0119568			0.960009	0.956773
g__Cloacibacterium	0.208967	0.00329425	1.05761e-09	0.400623	8.49862e-10		0.754813	0.614556		0.479124		0.132561	0.000525991		0.000411413	-0.101682	0.81176	0.912495	-0.103062	0.733064	0.00855163	1	0.795732	-0.0476421	0.653814	0.0237096	0.926819	0.97954	-0.374399	0.96428	0.0576067	0.78868	0.859302	0.0609408	0.736359	0.0804079	0.520081	0.664322	0.0467186	0.774682	-0.0120857	1	0.988921	0.0075641	0.954603		0.965113	0.999946
g__Lancefieldella	-0.258148	0.0049256	0.00334926	-0.181032	1.5024e-08		0.100363	0.134881		0.896511		0.0112424	0.0123531		0.00975622	0.218566	0.87082	0.939201	-0.124909	0.933323	0.0538935	0.895774	0.967958	-0.0120655	0.947016	0.21774	0.763903	0.891022	-0.312797	1	-0.114163	0.394505	0.51894	-0.00571094	0.981055	-0.138193	0.216356	0.284528	-0.0177812	0.949017	-0.0812041	0.765942	0.891729	-0.0432577	0.905926		0.979273	0.862745
g__Dialister	-0.19211	0.00520826	0.00355954	-0.167395	0.807937		0.00967243	0.0123341		0.988914		0.14119	0.190909		0.795508	-0.173887	0.25923	0.340282	-1.16633	0.661335	0.0659163	0.520122	0.510668	0.527339	0.390311	0.0589881	0.791591	0.912472	-1.10583	0.840302	-0.00693516	0.959912	0.988289	0.159986	0.962149	-0.0275192	0.747374	0.870546	0.112262	0.976147	0.0292438	0.676112	0.813979	0.394086	0.803526		0.954917	0.997374
g__Bacteroidetes_[G-5]	0.287902	0.00849667	0.00578246	0.211346	0.324376		0.751998	0.872363		0.783205		0.554063	1.29764e-13		1.02964e-13	0.444412	0.506615	0.639015	-0.412486	0.308399	-0.0295764	0.961924	0.976348	0.0467448	0.927153	-0.441729	0.796452	0.920696	-0.396292	0.976046	-0.0317282	0.962149	0.973511	0.065095	0.888571	-0.0142801	0.976147	0.936707	-0.0582693	0.844836	0.103597	0.676112	0.813513	-0.057257	0.933912		0.908277	0.957029
g__Pseudoleptotrichia	0.182134	0.00944454	0.00632992	0.165389			0.661335	0.594313				0.435497	0.385248			0.176758	0.755678	0.713778	-0.357845		-0.0407874	0.694058	0.675597	-0.140769		0.0809153	0.763903	0.733956	-0.097509		0.0313709	0.953156	0.930012	0.0817254		0.0176733	0.991493	0.985608	0.0753597		0.0244448	0.796626	0.7749	-0.0434883			0.862135	0.860208
g__Actinomyces	0.372468	0.0158862	1.7079e-06	0.569977	1.38849e-06		0.885259	0.94602		0.982109		0.03234	4.34606e-10		3.4833e-10	-0.497823	0.601347	0.741065	-0.561162	0.428167	0.221053	0.497277	0.640657	0.0701637	0.927153	-0.676743	0.690678	0.832785	-0.133808	0.947331	-0.176943	0.584149	0.727388	0.04732	0.982415	-0.0169847	0.981648	0.41204	-0.20544	0.315305	0.304343	0.182223	0.241396	-0.0124583	1		0.126966	0.168541
g__Anaeroglobus	-0.180861	0.02162	0.0152428	-0.118006	0.00037905		0.00509101	0.00642214		0.0311877		0.76358	0.0408151		0.0315521	0.128829	0.853413	0.934354	-0.453551	0.683932	0.0268379	0.954776	0.319516	0.119239	0.242229	-0.252495	0.759434	0.887128	-0.518734	0.759904	0.0302981	0.968394	0.944342	0.0546105	0.855464	0.045058	0.876071	0.781147	0.0713857	0.648062	-0.0245703	0.966568	0.912621	0.0406982	0.796626		1	1
g__Riemerella	0.15262	0.0320599	0.0235587	0.0796286			0.988914	0.981286				8.92092e-08	5.75638e-08			-0.0379768	0.842636	0.823619	0.0797253		-0.0607413	0.379275	0.331796	0.0866059		0.0446372	0.803694	0.794762	-0.261106		0.0440633	0.816592	0.772275	-0.0372391		0.0569515	0.648062	0.595442	-0.170156		-0.0207254	0.966568	0.973059	0.0753287			0.79546	0.790762
g__Schaalia	0.148161	0.0334831	0.0243545				0.0116874	0.00780665				4.26362e-07	2.72334e-07			-0.0133414	0.94809	0.945795			-0.0312394	0.732083	0.714739			-0.246203	0.56922	0.522878			0.0434083	0.803001	0.749616			0.0465406	0.736449	0.714233			0.0106081	0.874264	0.862678				0.429183	0.350995
g__Prevotella	0.152727	0.0485418	0.0638525	0.15645	0.797882		0.491686	0.622534		0.795508		0.885259	0.000799334		0.00064181	-0.378161	0.0128611	0.00869233	-0.109137	0.970905	0.0677772	0.600713	0.527998	0.136017	0.405278	-0.393187	0.328898	0.000143504	-1.31818	0.000113116	0.099911	0.268952	0.35024	0.108109	0.634182	0.0467678	0.846829	0.936707	0.0196585	0.981648	-0.00967086	1	1	-0.0140315	1		0.701965	0.517433
g__Porphyromonas	-0.148267	0.0514725	0.0378007	-0.212616			0.000105281	6.91924e-05				0.00170602	0.00113524			-0.123388	0.442456	0.389732	-0.473269		0.0920176	0.189594	0.145786	0.00447261		0.0602358	0.771191	0.745072	-0.224659		-0.0151345	0.888571	0.860494	0.13638		-0.0363574	0.631167	0.570502	0.0590505		0.00106858	0.966568	0.973059	0.0172966			0.925222	0.902599
g__Neisseriaceae_[G-1]	-0.354644	0.0623068	0.0458414	-0.353416	1.58734e-05		0.933323	0.858687		0.735053		0.991158	0.000306395		0.000240456	-0.273412	0.87082	0.939201	-0.117098	0.985914	-0.173863	0.559182	0.702209	-0.0671766	0.828012	0.641308	0.473644	0.603275	0.188407	0.47512	-0.22114	0.377586	0.494702	-0.0246816	0.978694	-0.0856709	0.87974	0.966202	0.0366522	0.965792	0.131679	0.720677	0.862678	-0.0365197	0.980412		0.928501	0.944492
g__Peptostreptococcaceae_[G-1]	-0.146917	0.0661432	0.00248072	-0.704308	0.0020172		0.173734	0.233371		0.988914		6.4562e-08	7.81121e-08		0.254851	-0.0641637	0.87082	0.803728	1.84222	0.657796	0.0165468	0.975793	0.976348	0.192433	0.92152	0.00200639	0.927258	0.0675506	-2.26601	0.0515701	-0.0674123	0.289702	0.374856	0.037097	1	-0.117112	0.0110264	0.00758596	-0.0355903	0.995673	-0.0173635	0.986449	0.908835	0.370628	0.795608		0.960009	0.997374
g__Scardovia	0.172878	0.072017	0.000818888	0.298927	0.000657693		0.504299	0.63733		1		0.960646	0.000306395		0.000240456	0.280094	0.410958	0.523124	0.235619	0.0260852	0.0483333	0.92152	0.329513	-0.106896	0.250121	0.243572	0.661376	0.522878	0.0592221	0.403731	0.0307804	0.984836	1	0.0261014	0.984836	0.00708991	1	0.800275	0.0706876	0.668878	0.098861	0.454637	0.584642	-0.0169412	1		0.918373	0.721537
g__Ottowia	0.153971	0.0916928	0.111649	0.205984	0.0830486		1	0.961393		0.921411		0.894669	1.86065e-07		1.50887e-07	0.212695	0.795492	0.461811	-0.00869117	0.353717	0.0717647	0.675219	0.820502	0.0211237	0.96418	0.0675777	0.886636	0.694561	-0.074798	0.558776	-0.0122174	0.968009	0.57448	-0.0663948	0.442643	-0.035042	0.836701	0.936707	-0.0207458	0.948661	-0.0263018	0.96666	0.993617	-0.0204203	0.989235		0.97309	0.999818
g__Selenomonas	0.13321	0.100662	0.0746256	0.249548			3.99854e-05	2.75483e-05				1	1			-0.129243	0.523798	0.465307	-0.312144		-0.00850602	0.962479	0.956677	-0.16982		-0.427999	0.159476	0.118616	-1.18435		0.0517773	0.795347	0.749616	0.159582		0.0934368	0.258228	0.205337	0.13026		0.0402353	0.5951	0.535724	-0.183211			1	0.997374
g__Moraxella	0.244785	0.126057	0.00112868	-0.103761	0.000892		0.351769	0.000261067		0.00020679		0.0274646	1.55497e-08		1.25602e-08	0.46811	0.2861	0.375568	0.240349	0.181833	-0.0121075	0.982273	0.999193	0.000911652	0.994037	0.246139	0.87258	0.961581	-0.318013	1	-0.00488003	0.99892	0.98324	-0.0173175	0.943904	0.00595957	1	0.824503	-0.0555574	0.688794	-0.110218	0.804547	0.930916	-0.059833	0.807393		0.780407	0.902599
g__Parvimonas	0.121507	0.212831	0.122122	0.207713	0.0914516		0.324376	0.0291254		0.0234397		0.180108	0.241451		0.467566	0.171081	0.733064	0.858687	0.0530346	0.518676	0.0191204	0.975793	0.564054	0.0821652	0.432911	-0.3105	0.663279	0.749407	-0.552195	0.606579	-0.0351283	0.807055	0.913032	-0.026044	0.874822	-0.0871401	0.250674	0.326874	-0.0755031	0.428301	0.00364176	0.967957	0.240224	-0.112193	0.180072		0.93422	0.98225
g__Stomatobaculum	0.109143	0.238644	0.186586	0.205774			0.910662	0.905989				6.19573e-09	3.9453e-09			0.155117	0.682768	0.614556	-0.00819293		-0.0359273	0.737742	0.725226	-0.0585526		0.198891	0.33911	0.281144	-0.17517		0.0248502	0.981055	0.973511	0.0174926		0.0415167	0.86056	0.824503	0.0635683		0.0159113	0.871974	0.862678	-0.0037837			0.720677	0.66058
g__Gracilibacteria_(GN02)_[G-1]	0.189996	0.302951	7.26432e-06	0.493805	5.73534e-06		0.353717	0.461811		1		0.661335	0.0242103		0.0194471	-0.288473	0.679902	0.820207	-0.614049	0.435497	0.141102	0.686246	0.712226	-0.138035	0.568864	-0.270268	0.947331	0.989101	-0.330267	1	0.0811645	0.937089	0.979378	0.0528215	0.97808	0.0540152	0.976147	0.987511	-0.00626919	0.999124	0.066795	0.92557	0.980063	-0.0812023	0.92557		0.729621	0.721164
g__Desulfobulbus	-0.151258	0.338196	0.282235	-0.0881624	0.140654		0.947751	0.282751		0.213126		0.353717	0.11536		0.0859137	0.600409	0.03234	0.0238553	-0.505583	0.883892	-0.00733875	0.982273	0.725226	0.13033	0.580402	0.283461	0.791591	0.917287	-0.7298	0.80011	-0.0454561	0.871347	0.842074	-0.0908338	0.711974	0.000350179	0.993132	0.990299	-0.0259672	0.976147	-0.0115234	1	0.847462	0.0880934	0.705108		0.917062	0.9672
g__Olsenella	-0.212392	0.351769	0.00688528	-0.0911785	0.00539062		0.500818	0.0469356		0.0354598		0.0648513	0.0251832		0.0204784	0.211906	0.933323	0.951964	0.0888651	0.47987	0.191984	0.581927	0.725226	0.00734361	1	-0.420054	0.888088	0.891022	-0.105813	0.763903	-0.0425605	0.974386	0.95393	-0.0339813	0.86227	0.0407198	0.981648	0.985608	-0.0214294	0.955226	-0.170065	0.713886	0.859299	0.00612007	0.966568		0.832937	0.687688
Unclassified f__Pasteurellaceae	0.0911631	0.367214	0.311165	0.220831			0.888928	0.874905				1.07e-07	7.30785e-08			-0.145084	0.33375	0.273666	-0.939977		-0.00832561	0.961924	0.95253	0.24686		0.0930907	0.654406	0.603275	0.051641		0.0350736	0.902988	0.875792	0.153872		0.053853	0.663057	0.638219	0.0430173		-0.00412101	0.986449	0.984474	0.187482			0.711603	0.652355
g__Arthrospira	-3.13986	0.383954	0.495473	-0.0679618	0.911867		0.456142	0.592355		1		0.737069	0.859478		0.917402	2.81298	0.773538	0.889709	0.943817	0.497526			0.956677	-0.133073	0.962479			0.999996	-0.322098	1			1	0.0141748	1			0.985608	0.102229	0.980709			0.943721	0.176897	0.943488
g__Oryzomicrobium	0.112682	0.41453	2.55821e-08	0.422595	2.02251e-08		0.998214	0.939201		0.87082		0.970905	1.07638e-19		8.89659e-20	0.286543	0.720959	0.387456	0.102654	0.302324	-0.0297521	0.927153	0.394772	-0.102398	0.30367	-0.302531	0.821585	0.93106	-0.204572	0.927258	0.0263319	0.989712	1	0.00724488	1	0.010023	1	0.936707	0.052252	0.835477	-0.0221033	0.987117	0.938831	0.040364	0.827643		0.711603	0.674427
g__Oribacterium	0.115008	0.435497	0.557844	0.160586	0.638986		0.94809	8.74324e-05		6.97737e-05		0.670602	3.58871e-60		2.96618e-60	0.229231	0.641736	0.788514	-0.355087	0.486472	-0.0114285	0.974818	0.0218291	0.188448	0.0172741	0.0549586	0.947331	0.336893	-0.866874	0.252805	-0.101802	0.43119	0.27534	-0.112942	0.210422	-0.0681387	0.664036	0.00922845	-0.183969	0.00723184	-0.0979202	0.645486	0.78291	-0.00337714	0.989235		0.995089	0.0328983
g__Veillonellaceae_[G-1]	-0.129563	0.448678	0.0585571	-0.0385255	0.0444469		0.240698	0.316117		0.940778		0.896511	0.00514553		0.00406867	-0.37878	0.181833	0.243491	0.131941	0.194571	0.0170074	0.992704	0.00523563	0.187844	0.00405669	-0.208754	0.927258	0.0381009	0.223893	0.0288972	0.120678	0.601909	0.746942	0.00576487	1	0.126126	0.545437	0.684965	-0.0303837	0.893459	0.0866174	0.676112	0.239198	0.0933084	0.179159		0.964243	0.623472
g__Peptostreptococcaceae_[G-5]	0.0804623	0.449544	0.397164				1.61582e-06	1.08037e-06				5.71966e-09	3.64707e-09			0.0783159	0.912075	0.906091			-0.066278	0.258544	0.206635			0.0304226	0.825879	0.802445			0.0720869	0.356944	0.302039			0.0901496	0.121383	0.0895817			0.0285172	0.582018	0.516517				0.79546	0.790762
g__Rothia	0.0864234	0.456142	0.399806	0.0478911			0.684489	0.617584				4.49395e-05	3.09097e-05			0.0871968	0.959342	0.949972	-0.0273425		0.00176047	0.998631	0.988072	0.0589723		-0.208669	0.836091	0.812403	-0.760555		-0.0159209	0.925483	0.901343	-0.0826072		-0.107078	0.0460128	0.0342595	-0.0729442		-0.0683594	0.530513	0.458078	0.0284468			0.960009	0.956773
g__Veillonella	0.0711903	0.587836	0.511991	0.176104			0.213171	0.166209				0.000354881	0.00024092			-0.0555955	0.797579	0.758319	-0.0360985		-0.00792126	0.962479	0.956677	-0.00395903		-0.0743334	1	0.999996	-0.0612945		0.0226992	0.984836	0.973511	0.0469496		0.0280363	0.949017	0.936707	0.0783759		0.00139596	0.966568	0.973059	0.070705			0.76918	0.746458
g__Tannerella	-0.515207	0.601347	0.741065	0.148027	0.970905		0.885259	0.945985		0.992802		0.94809	0.682107		0.544485	-2.41339	0.622144	0.76501	0.939437	0.280191	-0.145322	0.962479	0.988072	0.0171403	1	-0.425263	0.947331	0.176644	1.16909	0.135446	0.0575612	0.99892	1	-0.0524687	0.989601	0.0594097	0.99334	0.985608	-0.129487	0.935965	-0.151338	0.966568	0.9902	-0.109854	0.966568			0.997374
g__Yersinia	-0.07249	0.607593	0.750868	0.0170185	0.965857		0.860822	0.939201		0.940778		7.73633e-10	9.6353e-10		0.826882	-0.0832476	0.755678	0.875519	-1.03271	0.491939	0.00837082	1	0.988072	-0.102561	0.964654	-0.113113	0.958937	0.727694	-1.37752	0.586752	0.0410284	0.836897	0.930012	-0.114343	0.981055	0.0301908	0.933688	0.985608	0.0716192	0.981648	0.0223262	0.714616	0.859461	0.335206	0.800376		1	1
g__Peptostreptococcaceae_[G-2]	0.074849	0.607885	0.750878	0.0893905	0.988914		0.308486	0.0664704		0.0505599		0.0254815	4.86161e-05		3.91781e-05	-0.0833424	0.81176	0.912495	-0.118392	0.95864	-0.0446094	0.727354	0.667817	0.0759733	0.520077	-0.166731	0.927258	0.97954	-0.390961	0.943572	0.0282729	0.979755	0.973511	0.0384525	0.928284	0.0320544	0.949017	0.937835	0.0385226	0.850216	-0.0126193	1	0.688226	0.0565667	0.540984		0.630203	0.758766
Unclassified f__Comamonadaceae	0.0829974	0.614367	0.499827	0.182144	0.38748		0.311952	0.0247969		0.0200439		0.740298	1.95577e-47		1.6165e-47	-0.131018	0.853707	0.768767	-0.375898	0.376501	0.0407802	0.927153	0.031034	0.175384	0.0238653	-0.0706101	1	0.97954	-0.440145	0.926717	0.013034	1	0.827361	0.0770026	0.697523	0.0775689	0.689849	0.825201	-0.0522539	0.765609	0.0865347	0.408854	0.531851	-0.012806	1		0.969292	0.644003
g__Mogibacterium	-0.451463	0.693792	0.832119	0.104539	0.998214		0.68934	0.831959		0.829487		0.982109	0.77754		0.634304	0.88022	0.727817	0.858687	-0.83244	0.725698	-1.62284	0.145787	0.195687	-0.243768	0.653814			0.891022	-1.40817	0.900748	-1.43042	0.729417	0.85692	0.0548516	0.993437	1.16178	0.854291	0.940367	0.171824	0.87974	-0.137446	1	0.984474	0.0995281	0.943488			0.967015
g__Peptostreptococcus	0.0620979	0.70207	0.629727	0.00397859	0.422527		0.351769	0.454349		1		1	0.975462		0.933323	-0.101893	0.683932	0.828478	0.0983953	0.797579	-0.0431427	0.686246	0.82354	-0.0599882	0.715427	0.186958	0.468107	0.514557	-0.679435	0.39548	0.0389914	0.907259	0.973511	0.0332561	0.978132	0.021703	0.976887	0.936707	-0.0511253	0.839369	-0.0362082	0.905926	0.973059	-0.0218394	0.994176		1	1
g__Butyrivibrio	-0.236562	0.709411	0.220299	0.453329	0.164055		0.733064	0.858687		0.836902		0.980021	0.00688528		0.00539062	0.53161	0.832983	0.928667	0.184041	0.940955	0.639043	0.0711875	0.0937041	-0.488475	0.0796232	-0.216442	0.999134	0.999996	-0.287742	1	-0.349101	0.74718	0.86446	0.0951247	0.978132	-0.12407	0.976147	0.990299	0.0575484	0.976147	0.381206	0.643709	0.746563	-0.338753	0.59459			0.746859
Unclassified f__Selenomonadaceae	0.256942	0.723955	0.047646	0.552211	0.0360168		0.316136	0.401937		0.456142		0.933323	0.398958		0.313056	1.97937	0.341269	0.44177	-1.00993	0.532611	0.465833	0.484759	0.628286	0.0549018	0.98511			0.961581	-1.01556	0.947331	0.349991	0.474129	0.612922	-0.0268686	0.99892	-0.988569	0.92051	0.96825	0.208824	0.888724	0.0486256	0.969896	0.943721	0.216972	0.848508			0.9672
g__Bifidobacterium	0.234943	0.733064	0.0220661	0.416364	0.0176015		0.865542	0.939201		0.933323		0.885259	0.945985		0.95744	-0.94038	0.348118	0.449953	0.0443762	0.95744	-0.440878	0.580402	0.725226	-0.157384	0.665503	1.21162	0.553525	0.603275	0.437221	0.47339	0.346645	0.771414	0.881531	0.16722	0.792201	0.684167	0.219541	0.287799	0.292058	0.33056	-0.131829	0.966568	0.9902	-0.0460911	0.986255		0.862307	0.956773
g__Alloscardovia	-0.258326	0.733064	0.858687	0.234748	0.853707		0.463917	0.600726		0.95744		0.940778	0.739041		0.597366	-0.417778	0.890581	0.858687	0.568166	0.724809	-0.267286	0.927153	0.976348	0.0382443	0.992704	0.66771	0.925416	0.845857	0.481004	0.70458	-0.275005	0.937089	0.973511	-0.116486	0.925483	-0.0714864	0.981648	0.985608	0.120062	0.948661	-0.123313	0.978586	0.974976	-0.166652	0.92557		0.759153	0.758766
g__Fusobacterium	0.206188	0.747478	0.0182021	0.633609	0.0145038		0.312314	0.397164		0.775242		0.993769	1		0.983052	-1.41551	0.224709	0.29616	0.430101	0.720959	-0.119949	0.85271	0.94186	-0.160899	0.895331	0.480472	0.69566	0.109954	1.33927	0.082408	-0.0984935	0.810094	0.0238343	-0.582351	0.0183555	-0.13883	0.889241	0.850421	-0.262317	0.720004	0.287423	0.829972	0.942757	-0.164391	0.943488			0.9672
g__Lachnospiraceae_[G-7]	-0.275011	0.754361	0.86537	0.275838	0.740298		0.994062	0.908871		0.797882		0.496495	0.312743		0.238644	-1.07402	0.629844	0.775877	-0.587295	0.82375	-0.403314	0.520122	0.668814	0.01335	1	-0.103618	1	0.832785	0.50319	0.690833	-0.061059	0.988535	1	-0.0199333	0.99892	-0.212901	0.843509	0.89228	0.242546	0.774487	-0.273434	0.847233	0.943721	-0.0933563	0.966568		0.99813	0.956773
g__Ruminococcaceae_[G-1]	0.0599822	0.756954	0.166763	-0.035771	0.12422		0.658034	0.803728		0.883579		0.518657	0.651778		0.933323	0.163091	0.885259	0.945985	-0.124314	0.960646	0.0192365	0.975793	0.993344	0.0221979	0.974818	-0.0203764	0.968637	0.0406552	0.322105	0.0310414	0.0551213	0.827411	0.749616	-0.072471	0.605586	0.0673811	0.74579	0.87031	-0.0404244	0.879791	-0.0328139	0.957389	0.980063	-0.0499412	0.92557		0.885714	0.956773
Unclassified f__Streptococcaceae	0.16934	0.76358	0.872363	-0.0167665	0.751998		1	0.94602		0.885259		0.331402	0.238019		0.177422	1.64594	0.575834	0.713778	-1.07683	0.602056	0.244891	0.694029	0.833196	-0.0717852	0.908961	0.409413	0.87073	0.298333	0.542446	0.22463	-0.195381	0.827411	0.927556	-0.0193516	0.991639	0.325666	0.652391	0.782659	0.098913	0.877911	0.0300334	0.993292	0.943721	-0.127009	0.842021		0.871878	0.957029
Unclassified f__Lactobacillaceae	-0.0584633	0.775242	3.53505e-05	-0.169167	2.88287e-05		0.838711	0.930213		0.940778		0.0129494	0.000137761		0.000108746	-0.142476	0.593434	0.736863	-0.208265	0.798745	0.0941877	0.262066	0.0397995	0.195887	0.0303274	-0.132297	0.947331	0.698783	-0.634613	0.560827	0.0268074	0.978132	0.669794	0.107698	0.518209	-0.0254312	0.813953	0.827685	-0.0752851	0.690401	-0.00274423	0.986449	0.966088	0.0377622	0.879746		0.758172	0.88758
g__Cutibacterium	0.0769011	0.781892	0.000190229	0.346409	0.000148868		0.661335	0.804569		0.871363		0.338196	1.68489e-24		1.39261e-24	0.337314	0.683932	0.828478	0.0543817	0.520378	-0.080403	0.776159	0.896825	0.00708427	1	-0.257006	0.927258	0.93106	-0.105146	0.821796	-0.030681	0.963704	0.664539	0.11694	0.512393	-0.0624605	0.855629	0.361501	0.130686	0.280001	0.0527817	0.909944	0.973059	0.0245156	0.936002		0.960009	0.967138
g__Ruminococcaceae_[G-2]	0.236097	0.787932	0.0594532	0.491952	0.0451685		0.02162	0.0268422		0.680852		0.981592	0.0822444		0.0625104	2.11924	0.10223	0.0757197	-0.372263	0.90424	-0.404733	0.649229	0.795022	0.0815904	0.962479	-4.86447	0.0986165	0.0733935	-0.259229	1	-0.285387	0.604557	0.749616	-0.189642	0.711974	-0.180189	0.836701	0.936707	-0.0865888	0.949318	-0.367048	0.764418	0.890591	0.0285052	0.986449			0.862745
Unclassified o__Bacillales	0.584337	0.798745	0.878873	0.312911	0.761063		0.733064	0.435913		0.338196		0.940778	0.786503		0.639263	1.91716	0.740298	0.866346	0.606336	0.683932			0.725226	-0.306269	0.741707			0.666081	0.773082	0.694918			0.677167	-0.303121	0.711974			0.758985	-0.304467	0.783421			0.908835	-0.247189	0.92557			0.902599
g__Clostridiales_[F-1][G-1]	-0.142472	0.799577	0.908871	-0.121022	0.811044		0.0451685	0.0594532		0.962476		0.684503	0.828478		0.959342	-1.30986	0.0746221	0.0549148	-2.17657	0.775242	0.0433643	0.954776	0.474191	-0.368617	0.365277	0.742456	0.47512	0.605899	0.100026	0.927672	0.252081	0.38249	0.500687	-0.0340642	0.993437	0.236813	0.626679	0.758985	-0.0211354	0.997677	-0.092152	0.938054	0.984302	-0.000614674	1		0.997446	1
g__Colibacter	-0.0519635	0.805919	0.385248	-0.417332	0.297385		0.580456	0.610906		0.472155		0.170527	0.229352		0.682605	-0.0387503	0.847484	0.933622	1.30378	0.661335	0.0278465	0.927153	0.976348	0.0914436	0.975793	-0.229286	0.694123	0.832785	-1.32264	0.759904	-0.0337405	0.673967	0.807752	-0.0272811	1	-0.0891786	0.0457603	0.0597416	-0.166963	0.964137	-0.014131	0.998121	0.96669	0.327866	0.879746		0.79546	0.913285
Unclassified f__Veillonellaceae	-1.87958	0.81176	0.803728	0.387263	0.657574		0.988914	0.94744		0.885259		0.740298	0.132235		0.0984635	6.60885	0.775242	0.889709	-1.02268	0.940778			0.999193	0.0102134	1			0.931407	-1.14784	0.927672			0.988189	-0.0412595	0.993437			0.936707	-0.118326	0.949017			0.671183	0.297105	0.698793			0.947706
g__Propionibacteriaceae_[G-1]	0.0441447	0.823633	0.793068	-0.209555			0.991158	0.986444				0.556001	0.489938			-0.121239	0.564677	0.495473	0.174907		-0.0384132	0.653814	0.619454	0.0134938		0.209148	0.178918	0.135298	-0.768301		-0.0110337	0.91708	0.898322	0.162883		-0.00394058	0.949017	0.936707	-0.0353819		-0.023022	0.951931	0.946953	-0.104971			0.962561	0.957029
g__Peptidiphaga	0.45157	0.829487	0.564733	0.38427	0.440217		0.797882	0.908871		0.982109		0.993062	5.8056e-06		4.58039e-06	-1.22509	0.797579	0.906407	0.509933	0.853707	0.233931	0.927153	0.383636	-0.370465	0.293958	-1.12557	0.896761	0.976401	-0.254351	1	0.429441	0.876157	0.970276	0.121829	0.962149	0.263917	0.783421	0.907942	-0.168854	0.833313	-0.291958	0.92557	0.883326	-0.265828	0.748848			0.997374
g__Jonquetella	-0.109717	0.836851	0.00299939	0.529768	0.00238539		1	0.989431		0.95744		0.885259	0.000179145		0.000140109	3.99292	0.0600649	0.0783725	-1.37771	0.663497	-0.0384272	0.962479	0.932869	-0.121416	0.839502	-0.501135	0.86379	0.961581	0.108952	0.866584	0.0682463	0.988535	0.799046	0.245931	0.663455	0.208193	0.531982	0.67529	-0.0465422	0.976147	0.0704305	0.945685	0.986575	-0.0270549	1		1	0.997374
Unclassified p__Proteobacteria	0.0439291	0.838711	0.817373	0.0273024			0.94809	0.945795				0.797882	0.763115			-0.00546447	0.970905	0.961393	-0.0764857		-0.00530465	0.971428	0.976348	-0.0269888		0.0467902	0.86379	0.853673	-0.604907		0.010586	1	1	0.0323896		0.0113099	1	1	0.0598133		-0.0107919	1	1	0.00332567			0.718827	0.657267
g__Fretibacterium	-0.052275	0.838711	0.209719	-0.00887424	0.155801		1	0.622534		0.490975		0.0733668	0.00255334		0.00206111	0.0306333	0.985914	0.945795	-0.185373	0.797579	-0.0206246	0.927153	0.902306	0.00966362		-0.0210759	0.974687	0.977209	-0.927496		-0.0972669	0.190222	0.147579	0.0177238		-0.0805988	0.298531	0.24376	-0.0403034		-0.0391255	0.92557	0.904712	-0.0275856			0.755037	0.724702
g__Peptostreptococcaceae_[G-7]	0.131691	0.842119	0.0107183	-0.396356	0.00849667		0.894127	0.949972		0.94809		0.37466	0.486907		0.944154	0.525021	0.661335	0.804569	-0.901779	0.826882	0.0243724	0.998631	0.865476	-0.135225	0.739517	-0.55799	0.84297	0.630412	0.415517	0.494862	0.0308105	1	0.989478	0.0702848	0.97808	0.249648	0.742662	0.0682775	0.468521	0.052137	0.222284	0.724962	0.862678	0.125447	0.796062		0.871878	0.957029
g__Lachnoanaerobaculum	-0.12839	0.853707	0.00199223	0.529611	0.00161928		0.900556	0.953542		0.94809		0.896511	1.14748e-08		9.26372e-09	0.510111	0.773538	0.583709	-1.43273	0.448678	-0.0771121	0.936074	0.977366	0.0411035	0.975793	-0.637831	0.825879	0.931407	-0.051375	0.927672	-0.402949	0.400236	0.460926	0.351366	0.349856	-0.328129	0.304032	0.396329	0.148299	0.783463	0.0537984	0.966568	0.932188	0.121003	0.812282		0.9971	0.997374
Unclassified p__Bacteroidetes	-0.0572507	0.853707	0.79728	0.0268749	0.64932		0.410958	0.523461		0.829487		0.449544	0.000253603		0.000200786	0.0981837	0.940778	0.889709	0.0686201	0.377728	0.0748437	0.732083	0.754795	0.0838679	0.617604	-0.145071	0.976046	0.728818	-0.701649	0.587937	0.0548126	0.902988	0.973511	0.00952506	1	-0.0360295	0.877911	0.960574	0.00822343	0.995673	-0.0219071	0.987117	0.9902	-0.0357955	0.966568		0.665612	0.569789
g__Corynebacterium	-0.266977	0.853707	0.758319	-0.149854	0.615918		0.94809	0.98085		0.940778		0.922805	0.114817		0.0854625	1.62912	0.683932	0.828478	0.52674	0.735053	-0.015892	1	0.956677	0.150055	0.885642	0.944719	0.803694	0.924033	0.161611	0.879805	-0.864537	0.218944	0.285031	0.0825119	0.981055	-0.282492	0.742662	0.86852	0.0812411	0.965469	-0.138325	0.950087	0.973059	-0.160945	0.900428		0.985779	1
g__Peptostreptococcaceae_[G-6]	-0.11785	0.860468	0.939201	0.17642	0.933323		0.93402	0.939201		0.866375		0.933323	0.974846		0.94809	0.39203	0.736812	0.859478	-0.633977	0.787608	0.263387	0.839502	0.932869	-1.62558e-05	1	0.203604	0.947331	0.317194	0.945828	0.238855	0.289628	0.936651	0.859302	0.300588	0.73555	0.105445	0.976147	0.990299	-0.0598257	0.976147	-0.160452	0.966568	0.614479	-0.410029	0.474859		0.962561	0.997374
g__Simonsiella	0.0639923	0.860822	0.939201	0.134151	0.94809		0.853707	0.937976		0.933323		0.0680042	0.0901463		0.351769	0.423662	0.622144	0.76501	-0.398853	0.797882	-0.165647	0.493901	0.638718	0.0669903	0.962479	-0.212955	0.943475	0.323905	0.667416	0.244152	-0.0323819	0.981055	0.669794	-0.204669	0.517049	-0.13632	0.683898	0.819717	0.0418478	0.976887	-0.228425	0.257614	0.337362	0.192822	0.602929		0.812557	0.830782
g__Lachnospiraceae_[G-2]	0.0562632	0.87924	0.945795	0.0821267	0.970905		0.885259	0.804569		0.661335		0.959342	7.11421e-14		5.62445e-14	-0.184892	0.762508	0.397164	0.127801	0.312132	0.154412	0.432911	0.564054	0.0925866	0.487866	0.0930584	0.940091	0.97954	-0.44529	0.925737	0.0421216	0.981055	0.979378	0.0421509	0.937089	0.0211539	0.995673	0.985608	0.0311809	0.935965	0.0786318	0.759973	0.519585	0.0800372	0.401114		0.93422	0.63322
g__Kocuria	0.0347542	0.885259	0.872363	-0.0278354			0.857875	0.833419				0.00354144	0.0024304			0.0775687	0.922805	0.910509	-0.0561684		0.00794828	1	0.999193	0.0201144		-0.129495	0.947331	0.961581	-0.216922		-0.0224282	0.86705	0.841076	0.0545264		-0.0243206	0.839369	0.795074	0.0398122		0.0479565	0.516415	0.441403	-0.0238882			0.756419	0.724783
g__Mobiluncus	0.226804	0.885259	0.945985	0.165137	0.922805		0.933323	0.939201		0.860822		0.933323	0.00688528		0.00539062	1.19394	0.751998	0.872363	0.0975977	0.94809	-0.584549	0.686246	0.82354	0.165197	0.751985	0.731971	0.951726	0.989504	-0.310282	1	-0.0902626	0.984836	0.338594	-0.272731	0.262168	0.11359	0.976147	0.992733	-0.0230505	0.990198	0.701504	0.796062	0.908835	0.0227614	0.984656		1	1
g__Absconditabacteria_(SR1)_[G-1]	0.0378884	0.885259	0.244419	0.190029	0.182626		0.890185	0.947604		0.993849		0.885259	0.777168		0.632492	-0.0372106	0.947914	0.982525	-0.0713318	0.601347	0.0233011	0.968131	0.988072	0.0103647	1	-0.108128	0.990346	0.97954	-0.225907	0.925737	-0.0115612	0.969025	0.988289	0.010064	1	-0.049972	0.687096	0.823089	-0.000651763	1	-0.0354971	0.943488	0.984474	-0.00129466	0.98074		1	1
g__Lactococcus	-0.635086	0.892952	0.523124	-0.454648	0.410958		0.896511	0.525352		0.414191		0.960646	0.739041		0.597619	0.931201	0.940778	0.926885	0.483186	0.801758			0.991746	0.0227508	1			0.408889	0.892685	0.464466			0.274599	-0.417524	0.323456			0.445161	-0.385956	0.516432			0.785917	0.245772	0.803526			0.606503
Unclassified c__Negativicutes	0.064315	0.897495	0.402958	-0.0204567	0.317076		0.406935	0.518331		0.544388		0.970905	1		0.988914	-0.208257	0.885259	0.926885	0.0504639	0.775242	0.0850311	0.917483	0.956677	0.0547999	0.885642	0.100626	0.937205	0.065033	0.340367	0.0498838	-0.0634637	0.942488	0.749616	0.108679	0.60618	-0.051633	0.949017	0.453571	0.130069	0.347037	0.0895311	0.826736	0.658749	0.0908341	0.515428		0.0497372	0.0652462
g__Cardiobacterium	-0.0507154	0.900556	5.258e-06	-0.168481	4.14532e-06		0.37466	0.486925		0.437279		6.5349e-05	3.8102e-05		3.10781e-05	0.239101	0.61597	0.758319	0.0500321	0.618356	-0.0179203	0.964654	0.795022	0.069516	0.649229	-0.402327	0.759904	0.887128	-0.421326	0.927258	0.193477	0.120203	0.157335	-0.00849705	0.981055	0.107671	0.648062	0.781147	0.0261711	0.949017	-0.166165	0.21754	0.284876	-0.0267423	0.974924		0.974731	0.967015
g__Acinetobacter	0.359381	0.911867	0.702555	-0.294785	0.565218		0.982109	0.998188		0.964058		0.94809	0.825127		0.682768	-1.54043	0.842119	0.799797	1.18136	0.336866	-1.5515		0.78162	0.275981	0.795909			0.927241	-1.18127	0.927258	1.59418		0.988289	0.0498543	0.99892	2.01254		0.655432	-0.304166	0.671073	1.78908		0.908079	0.16624	0.92557			0.9672
g__Acidovorax	-0.0769618	0.911867	4.99416e-11	0.836859	3.98549e-11		1	0.949972		0.892952		0.225046	0.296382		0.313383	-0.218793	0.900595	0.954387	-0.451892	0.733064	0.192108	0.739063	0.865476	-0.0802982	0.927153	-0.170835	0.999134	0.999996	-0.265683	1	0.195736	0.856458	0.949221	0.0483692	0.989712	-0.0742562	0.948661	0.985608	0.0730092	0.949017	-0.12991	0.921696	0.974725	0.0570753	0.957389		0.862307	0.956773
Unclassified f__Neisseriaceae	-0.15887	0.920083	0.961393	-0.0374349	0.933323		0.0980597	0.131763		1		0.740298	0.866346		0.940778	1.54277	0.45482	0.588213	-1.7774	0.857243			0.856935	0.214392	0.889939			0.961581	-0.967543	0.947331			0.851937	-0.19078	0.875838			0.742936	-0.269465	0.762829			0.973059	-0.115758	0.966568			0.997374
g__Kingella	-0.181256	0.920316	0.961393	-0.00497455	0.940778		0.699921	0.834717		0.970905		0.933323	0.828069		0.683036	1.48535	0.632492	0.777168	0.708641	0.634483	0.936872		0.988072	0.0370719	0.998631			0.923015	0.158805	0.927258	-0.532021		0.540055	-0.294395	0.589144	0.812975		0.757217	-0.237996	0.77771	0.14606		1	-0.0177214	1			0.920239
g__Peptostreptococcaceae_[G-9]	0.0292971	0.922805	0.961877	0.0752992	0.940778		0.940955	0.939201		0.87082		1.4926e-14	3.62775e-36		2.99844e-36	-0.140442	0.634483	0.778574	-0.199642	0.733064	0.0871019	0.427236	0.333111	0.104956	0.253325	-0.377275	0.447457	0.568561	-0.581231	0.546458	-0.0145023	0.942488	0.754172	0.0742162	0.618087	-0.0660094	0.430241	0.570502	0.0486032	0.783421	0.0006076	0.982084	1	-0.0100141	1		0.944015	0.967015
g__Enterococcus	-0.0529552	0.922805	0.939201	0.0217547	0.866239		0.940778	0.610906		0.472161		0.693792	0.832119		0.842636	0.231916	0.940778	0.828478	0.255226	0.448678	0.111415	0.705436	0.838965	0.054688	0.955985	-0.499459	0.753616	0.885703	0.0561106	0.803694	-0.128113	0.624463	0.530647	-0.175566	0.403921	-0.138547	0.631288	0.290418	-0.226736	0.221183	-0.0169254	1	0.890591	0.104168	0.764418		0.308642	0.402496
g__Eggerthia	0.0393511	0.926003	0.525352	-0.0200527	0.414191		0.740298	0.866346		0.90424		0.604859	6.07623e-09		5.15435e-09	-0.286515	0.678547	0.819129	0.219734	0.606651	0.128333	0.451446	0.584959	-0.0956605	0.580402	-0.38985	0.760784	0.887436	-0.0947524	0.86379	0.0131885	1	0.725696	0.133227	0.574774	0.0470209	0.949017	0.940367	0.0632036	0.855629	0.143794	0.234499	0.30818	-0.108374	0.683816		0.995722	1
g__Anoxybacillus	0.0298055	0.9273	0.399806	0.178428	0.314077		0.634483	0.739484		0.598562		0.480937	2.5643e-32		2.11947e-32	0.189734	0.857875	0.939201	0.123926	0.529961	0.063356	0.754721	0.881524	0.0169868	0.975793	-0.109372	0.990346	0.999996	-0.309113	1	0.00847245	1	1	0.0160272	0.99892	0.0391299	0.948661	0.985608	-0.00858151	0.981648	0.0436137	0.781257	0.90461	-0.0395279	0.93414		0.917062	0.9672
g__Lactobacillus	-0.109643	0.933323	0.947604	-0.0541936	0.888491		0.271694	0.35708		0.337284		0.940778	0.98085		1	-0.36212	0.933323	0.973745	-1.8877	0.683932	0.210518	0.887727	0.956677	0.00621168	1	1.21705	0.397588	0.51704	0.689709	0.56922	-0.271157	0.810094	0.434696	-0.358128	0.332128	-0.301406	0.756917	0.795776	-0.263063	0.666807	0.0578841	0.98363	1	-0.055686	0.98838		0.997264	1
Unclassified p__Firmicutes	-0.031177	0.933323	8.226e-10	-0.206981	6.59907e-10		0.480937	0.615817		0.735053		0.0621162	0.028849		0.0232133	-0.256302	0.377257	0.375568	-0.558911	0.286509	0.0109762	1	0.999193	0.0132643	0.992704	0.171484	0.694123	0.592925	-0.606494	0.464466	0.05643	0.841095	0.569539	0.087457	0.438014	0.032494	0.957272	0.59805	0.0732998	0.467037	0.00618591	0.966568	0.62642	0.0572727	0.484637		1	0.997374
g__Pseudomonas	-0.235012	0.933323	0.973745	0.00793653	0.933323		0.998946	0.945795		0.882553		0.940778	0.94744		0.885259	-0.342093	0.940778	0.736863	0.584785	0.593143	-0.982855	0.34717	0.448617	0.259781	0.675219	2.58562	0.384081	0.500739	0.33101	0.791591	0.0585919	1	0.749616	0.367188	0.610957	0.0253403	1	1	-0.0161598	0.998906	-0.132547	0.986449	0.938831	0.16835	0.827643			0.90655
g__Bacteroidales_[G-2]	-0.0784777	0.933323	0.939201	0.193024	0.866239		0.841575	0.375568		0.287157		0.2944	4.97294e-11		3.96349e-11	-1.25309	0.555895	0.690003	0.653141	0.428217	0.00838408	1	0.976348	-0.0705632	0.927153	-0.0467614	1	0.890888	0.205572	0.763903	-0.0591717	0.978132	0.989478	0.00700909	1	0.0720399	0.976147	0.970125	0.0992626	0.892413	-0.00483989	1	0.702799	-0.240433	0.554687		0.628869	0.758766
g__Treponema	0.0405967	0.933323	0.161504	-0.111875	0.11913		0.709411	0.224742		0.166968		0.97631	0.0209508		0.0165991	0.570707	0.529961	0.664246	-0.806266	0.606651	-0.164091	0.33655	0.434714	-0.0415714	0.935131	0.345809	0.698268	0.838902	-0.0185966	0.86379	0.108806	0.792201	0.902384	-0.0201214	0.984836	0.185407	0.403699	0.52557	0.0295189	0.976147	-0.0069518	1	1	-0.00638416	1		0.729621	0.860208
g__Johnsonella	-0.0295879	0.933323	0.930213	-0.00742887			0.00467524	0.00318176				0.100363	0.0744715			0.139905	0.805919	0.777096	0.0728483		-0.00677366	0.971428	0.976033	-0.027286		-0.0374621	0.98511	0.97954	-0.434577		0.00575392	0.99892	0.989478	0.0199501		0.0139991	1	0.995303	0.0674346		-0.0111829	1	1	0.00209133			1	1
g__Peptococcus	-0.0656778	0.940778	0.00543905	0.380402	0.00430497		0.988914	0.682107		0.544485		0.744535	2.51317e-11		1.99732e-11	0.74448	0.736812	0.859478	-0.299943	0.808872	-0.0625801	0.950886	0.976348	-0.0470059	0.927153	-0.0888784	1	0.961581	-0.0362834	0.86379	0.290748	0.476662	0.618253	0.0565609	0.960873	0.290541	0.433904	0.57149	0.0630651	0.899188	-0.0817718	0.957389	0.980063	0.0483564	0.92557		0.756419	0.407099
Unclassified c__Bacilli	-0.0490497	0.940778	0.98085	0.0711073	0.95794		0.729053	0.858687		0.940778		0.0523055	0.00588587		0.00467524	0.498363	0.420166	0.534633	0.0586845	0.740298	-0.223767	0.581927	0.547758	-0.139991	0.419945	-0.132721	0.999879	0.887436	0.029586	0.759904	0.127056	0.855911	0.930012	0.0943089	0.833907	0.026195	0.997521	0.845032	0.104617	0.714053	-0.218151	0.481062	0.560548	0.135523	0.435885		0.8818	0.964521
g__Ligilactobacillus	-2.63285	0.940955	0.98085	-0.0362587	0.940778		0.909271	0.958313		0.940778		0.965857	0.190294		0.140654	4.64123	0.866239	0.126937	1.4664	0.0947351			0.797881	0.321645	0.828012			0.97954	-0.750123	0.976046			0.973129	0.162375	0.979814			0.985608	0.0683641	0.985391			0.908835	0.191119	0.92557			1
Unclassified f__Weeksellaceae	-0.0422286	0.942821	0.945985	0.152886	0.885259		0.866709	0.939201		0.885259		0.314077	0.383453		0.2944	0.272621	0.723955	0.858687	-0.387983	0.797882	-0.0658734	0.89224	0.932869	-0.0798688	0.83922	-0.0982647	1	0.97954	-0.0882769	0.925737	0.0698197	0.947977	0.973511	-0.0582269	0.91708	0.136867	0.663057	0.795074	-0.0744626	0.879057	0.0571315	0.908986	0.973059	0.0306808	0.966568		0.928501	0.577209
g__Cryptobacterium	-0.0833983	0.94809	0.989431	0.0812167	0.993769		0.940778	0.65117		0.517705		0.520378	0.224742		0.166968	-1.24427	0.428707	0.547586	-1.14567	0.807937	0.108734	0.947016	0.896825	-0.138713	0.778859	-1.49485	0.787325	0.908541	-0.798726	0.925737	0.321714	0.438014	0.569539	-0.172391	0.673967	0.322886	0.459003	0.593941	-0.0310556	0.981648	0.287743	0.651176	0.785917	0.121164	0.842952		0.928388	0.883633
Unclassified o__Bacteroidales	-0.0623022	0.94809	0.369264	0.451002	0.280808		0.97631	0.952582		0.900556		0.853707	0.601044		0.464398	0.702564	0.883579	0.945904	-0.686604	0.940778	-0.524966	0.6558	0.797592	-0.0933216	0.958588	1.27234	0.665824	0.805978	0.183577	0.925737	-0.993243	0.366474	0.480248	0.601591	0.496472	-0.386839	0.71333	0.640703	0.44403	0.501915	-0.429956	0.829972	0.942757	0.104419	0.947737			0.967015
g__Staphylococcus	-0.0325471	0.94809	0.758171	0.00493694	0.614367		0.95744	0.614556		0.476642		0.634483	0.00255334		0.00206111	0.264238	0.885259	0.94744	0.197924	0.334958	0.0190139	0.992704	0.839313	-0.0726267	0.706996	-0.444362	0.722472	0.523921	0.157389	0.405218	-0.0492616	0.888571	0.22663	-0.157034	0.172022	-0.158804	0.298531	0.272344	-0.1566	0.207734	-0.0472798	0.966568	0.980063	0.0334159	0.92557		0.908277	0.9672
Unclassified c__Betaproteobacteria	-0.0256511	0.957369	0.806971	0.190851	0.663497		0.885259	0.945985		0.991158		0.753612	0.87265		0.970905	-0.27529	0.432742	0.553315	0.217037	0.38748	0.125754	0.373575	0.482627	-0.15915	0.417383	0.0746723	0.926819	0.97954	-0.0966961	0.926819	0.121772	0.526881	0.673056	-0.0204309	0.984836	0.0391164	0.975139	0.928527	0.0997668	0.808159	0.0213581	0.947737	0.902404	-0.122921	0.777956		0.906224	0.956773
g__Bacteroidetes_[G-7]	0.0157217	0.95744	0.94744	-0.0439779			0.127514	0.0944023				0.024626	0.0175625			-0.0724785	0.878795	0.858687	-0.224089		-0.0530477	0.64414	0.610339	-0.0391848		-0.21404	0.844471	0.832785	-1.05989		-0.00718886	0.978132	0.969687	0.0885839		-0.0221615	0.877911	0.845032	0.106874		-0.018739	0.986449	0.984474	0.0433832			0.736347	0.69166
g__Arachnia	-0.0193557	0.95864	0.526195	0.0187663	0.41453		0.735053	0.622534		0.489867		0.418062	0.00075263		0.000599838	-0.117025	0.735053	0.858687	-0.203948	0.737069	-0.0158379	0.935131	0.078138	0.131096	0.0603237	0.031929	0.9133	0.97384	-0.441116	0.886636	0.0244395	0.984836	0.989478	-0.0094077	0.974386	0.00276729	0.982665	0.272344	-0.0964413	0.207343	-0.0311306	0.943488	0.984474	0.0118687	0.94023		0.971525	0.9672
g__Limosilactobacillus	-0.0650035	0.95886	0.478169	0.279758	0.368399		0.988914	0.910509		0.805919		0.933323	0.0011956		0.000954152	-0.237448	0.940778	0.00580206	1.04927	0.00462757	0.255466	0.87882	0.524619	-0.222446	0.403295	0.581593	0.925737	0.97954	-0.220488	0.990346	0.236441	0.874822	0.672939	0.252663	0.520544	0.122737	0.963826	0.985608	0.0108225	1	0.575804	0.241551	0.187868	-0.381008	0.141491		0.964243	0.944492
g__Alloprevotella	0.0132367	0.959342	0.949972	-0.231233			0.648668	0.581383				3.84792e-05	2.57492e-05			0.211656	0.632492	0.561404	0.210727		-0.00625428	0.971428	0.975157	0.0100752		0.372777	0.0498838	0.0380464	0.00965615		0.0270015	0.978132	0.971018	-0.0125162		0.00679329	0.995673	0.985608	-0.0158099		-0.0307694	0.943488	0.938831	-0.0441802			0.504927	0.631448
g__Lachnospiraceae_[G-8]	0.0122634	0.960028	0.949972	-0.102268			0.940778	0.939201				4.96555e-18	3.00385e-18			-0.00690918	0.9273	0.912495	-0.275509		-0.00535632	0.966804	0.967539	-0.000361337		0.146173	0.458353	0.401444	-0.0622145		0.020939	0.984836	0.973511	0.156992		0.0165528	0.993132	0.985608	0.136335		-0.00464487	0.988304	0.986575	-0.0284727			0.758172	0.725656
Unclassified f__Burkholderiaceae	-0.0194376	0.962476	0.972425	0.0673436	0.933323		0.735053	0.858687		0.962476		0.736812	1.66069e-05		1.31378e-05	-0.0860447	0.883579	0.639518	0.0778962	0.353717	0.0212584	0.975793	0.795732	0.0792824	0.653814	-0.310229	0.718471	0.460654	0.0830655	0.350851	0.0354524	0.965017	0.988289	-0.0102474	0.981055	-0.0146313	0.949017	0.966202	-0.0402407	0.87974	0.060223	0.662368	0.797007	0.0380314	0.840972		0.669993	0.631448
g__Streptococcus	0.0115006	0.962511	0.953542	0.0216875			0.253544	0.195984				0.0010649	0.00075263			-0.0228699	0.885259	0.872363	-0.332154		0.0284117	0.927153	0.902306	0.032509		-0.0607444	1	0.98965	-0.23965		0.0119934	1	1	0.119624		0.0201266	0.980477	0.985608	0.0780033		0.0674207	0.0997327	0.0725218	-0.0289646			1	1
Unclassified f__Bacteroidetes_[F-1]	-0.055332	0.970905	0.749529	0.284306	0.606651		0.76358	0.00126398		0.00100904		0.793089	0.903554		0.795343	1.11106	0.37466	0.486925	0.634381	0.385183	-0.0666149	0.982273	0.956677	-0.127479	0.885642			0.786378	-1.92797	0.796452	-0.628423	0.867423	0.632587	0.422187	0.490056	0.444558	0.914848	0.725654	0.320825	0.582523	0.0538531	0.994176	0.984302	0.105762	0.93414		0.733398	0.862745
Unclassified f__Enterobacteriaceae	0.0261185	0.970905	0.169994	0.246528	0.126283		0.799577	0.908871		0.880913		0.687814	1.82347e-15		1.50715e-15	-0.934877	0.159985	0.215009	-0.453301	0.260779	0.00933518	1	0.547758	-0.115066	0.419945	1.56349	0.0204981	0.0273059	-0.0207064	0.755491	0.104546	0.937089	0.180717	0.211526	0.13739	0.0597824	0.976147	0.784546	0.0972533	0.654129	-0.0380005	0.986449	0.317126	-0.173506	0.24087		0.995089	1
g__Aggregatibacter	0.010252	0.97631	1	0.0990383	0.988914		0.0396009	0.00248072		0.0020172		0.148015	0.000879767		0.000700238	0.190612	0.632601	0.77754	0.0400312	0.303654	0.00564484	1	0.988072	-0.0111439	0.962479	-0.070316	1	0.694561	-0.0439079	0.558776	-0.0705404	0.473067	0.21651	-0.104665	0.164659	-0.0892749	0.301049	0.0307133	-0.147034	0.0236061	-0.0652413	0.765942	0.891203	-0.0166704	1		0.115734	0.153973
g__Catonella	0.0127287	0.97631	0.932623	0.0430405	0.842636		0.871363	0.71864		0.57933		0.682768	0.825127		0.799577	-0.373756	0.315776	0.401629	0.010095	0.885259	0.0772376	0.785172	0.614126	-0.105462	0.473274	-0.59785	0.421676	0.549091	-0.0625001	0.80334	0.0116683	1	0.492013	-0.118639	0.37606	-0.111855	0.455846	0.412281	-0.134153	0.315305	0.0958306	0.614661	0.762762	-0.0572807	0.933912		0.962561	0.944492
g__Bacteroidetes_[G-3]	-0.0171654	0.977392	0.98085	0.124239	0.940778		0.993769	0.0515585		0.0392557		0.885259	1.60738e-17		1.32855e-17	0.0956931	0.94809	0.989431	-0.828638	0.504952	-0.0629285	0.7805	0.896825	0.0571261	0.911978	-0.213009	0.943475	0.987015	-0.389903	0.98507	-0.108278	0.523659	0.672939	-0.0369033	0.937089	-0.0348774	0.893459	0.0511329	-0.215013	0.0392688	-0.0544999	0.936002	0.710503	-0.133229	0.558518		0.531969	0.63322
g__Abiotrophia	-0.0984163	0.980589	0.937976	0.207985	0.853707		0.735053	0.858687		0.97631		0.398743	0.511827		0.853707	-0.707118	0.940778	0.98085	-0.673283	0.628614	0.647888	0.771443	0.892962	-0.132109	0.862622			0.798629	-1.82518	0.812711	-0.366079	0.94842	0.807752	-0.201488	0.673967	-0.98324	0.652391	0.782659	-0.101936	0.932352	-0.498558	0.93414	0.974976	0.107051	0.92557		0.923432	0.863964
g__Mitsuokella	-0.0110872	0.982109	0.975882	0.337294			0.942821	0.939201				0.432742	0.383453			-0.120444	0.448638	0.391718	-0.451419		0.0367696	0.861475	0.94698	0.222095	0.895331	-0.114488	0.958937	0.969028	-0.967352	0.88219	0.0393412	0.857526	0.950172	-0.0194499	1	-0.00382895	0.953578	0.985608	0.122543	0.976147	-0.0270069	0.938054	0.88335	0.417467	0.748848		0.163854	0.219712
g__Leptotrichia	0.0188546	0.982109	0.047646	0.327914	0.0360319		0.970905	0.939201		0.87082		0.897562	1.27085e-07		1.02939e-07	-0.95712	0.490975	0.622534	-0.358929	0.720959	-0.147424	0.794269	0.628286	-0.14697	0.484759	0.760127	0.654614	0.794762	-0.034666	0.8727	-0.0115188	0.99892	0.186545	0.299724	0.141945	0.0654706	0.976147	0.936707	0.088068	0.843421	0.10413	0.909049	0.973059	-0.025763	0.998121		0.283323	0.371003
g__Capnocytophaga	-0.0119521	0.98398	0.0242103	-0.0644038	0.0194471		0.0644481	0.0847476		0.853707		0.732065	9.00962e-09		7.2651e-09	-0.260361	0.361638	0.470133	-0.155539	0.905619	0.0194608	0.975793	0.987473	0.0291802	0.951868	-0.302742	0.791432	0.72573	-0.637868	0.586752	0.0601708	0.836897	0.930012	0.00430308	0.99892	0.0470009	0.893459	0.936707	-0.0418887	0.839369	-0.0415822	0.92557	0.980063	-0.0157568	1		0.992211	0.606503
g__Lachnospiraceae_[G-3]	0.00815155	0.985914	1	0.0940662	1		0.940778	0.956583		0.905619		1	0.989431		0.948361	-0.438606	0.410958	0.523461	-0.385195	0.735053	-0.0185257	0.971428	0.988072	0.00536469	1	0.0935641	0.927258	0.887128	0.0507442	0.755239	-0.0164805	0.982415	0.999264	0.0388052	0.984836	0.0171715	1	0.959598	0.0737802	0.877299	-0.0131533	1	0.984474	-0.0659672	0.938054		0.926321	0.862745
Unclassified f__Lachnospiraceae	0.00779021	0.987145	0.391718	0.197122	0.308399		0.751998	0.872363		0.883579		0.892952	0.00534268		0.00422597	0.525784	0.275995	0.099582	0.20939	0.0742653	-0.0386316	0.927153	0.214252	-0.136017	0.160355	-0.893666	0.151457	0.113383	-0.0909654	0.803694	-0.0933929	0.694399	0.827361	-0.0493255	0.82292	-0.174804	0.239944	0.314472	-0.087918	0.594407	0.0114841	0.982084	1	-0.0123372	1		1	1
g__Campylobacter	0.0141488	0.990897	0.000899909	0.613373	0.000716771		0.94809	0.961393		0.92071		0.735224	1.34635e-07		1.07e-07	-0.807727	0.799577	0.908871	-2.79127	0.587836	-0.0687257	0.955785	0.0953714	-0.395878	0.0722867	-0.552857	0.947331	0.97954	-0.77657	0.927258	-0.0443552	0.984836	1	-0.0244721	0.993437	-0.209788	0.663057	0.795074	-0.00783006	1	-0.122727	0.936002	0.950954	-0.153319	0.859743			0.686856
g__Stenotrophomonas	0.00552335	0.990897	4.88035e-05	0.375255	3.93416e-05		0.87924	0.0477129		0.0360995		0.94809	1.28302e-06		1.06045e-06	0.26573	0.795508	0.906091	-0.0167525	0.720959	0.152494	0.442734	0.276433	-0.140225	0.20921	0.236434	0.754944	0.0732298	0.354952	0.0556822	-0.0320612	0.950364	0.987289	0.0226285	0.993437	-0.0273577	0.949017	0.985608	0.027105	0.975382	0.0479843	0.900428	0.973059	-0.0583964	0.92557		0.805319	0.922697
g__Lacticaseibacillus	0.0128787	0.993769	0.333489	0.427881	0.254555		0.838711	0.906407		0.797579		0.396545	0.509336		0.566479	0.659228	0.836902	0.660746	0.653501	0.526245	0.0938333	0.975793	0.993993	-0.0316437	0.989657			0.887436	-1.44542	0.890469	-0.0795254	0.98889	0.973511	0.186678	0.91708	-0.118972	0.966003	0.985608	0.138923	0.935965	0.248285	0.877978	0.963399	-0.0398323	0.999478		1	0.967015
Unclassified f__Prevotellaceae	-0.0184277	0.993849	0.748144	-0.0767326	0.604859		0.900556	0.762775		0.618356		0.371316	0.296382		0.225081	-0.526836	0.725395	0.858687	0.000709663	0.923499	0.806646	0.297587	0.389406	0.0152879	1	-0.578967	0.947331	0.989196	-0.156208	0.976046	-0.0512781	0.99892	0.635226	0.350919	0.49236	-0.0688369	0.987321	0.493165	0.331555	0.377181	0.33829	0.803709	0.887981	-0.202476	0.75103		0.770192	0.898721
g__Peptostreptococcaceae_[G-4]	-0.000548928	1	1	-0.235248			0.97631	0.966123				0.885259	0.866346			-0.0318761	0.877752	0.858687	-0.187816		0.0118748	0.992704	0.988072	-0.00127479		-0.0394423	0.976046	0.97954	-0.574929		0.0107999	1	1	0.10954		-0.0152735	0.87974	0.853653	-0.0369395		0.00396371	0.957389	0.951475	-0.168224			0.614039	0.569789
Unclassified o__Lactobacillales	-0.00512959	1	0.99869				0.0352509	0.0251832				0.000665326	0.000448599			-0.0228935	0.94809	0.945985			-0.0499601	0.444334	0.380717			0.0648743	0.688169	0.656255			0.0386834	0.838526	0.796111			0.0521495	0.648062	0.58987			0.0232509	0.63582	0.584642				0.405507	0.325038
g__Slackia	-0.0186449	1	0.930213	0.214071	0.838668		0.544485	0.682107		0.933323		0.970905	0.930213		0.838711	0.49824	0.933323	0.973745	0.00823632	0.933323	-0.026578	0.998868	0.833196	-0.177285	0.694029	4.70644	0.3679	0.482501	-0.558043	0.97453	0.0387926	1	0.949151	-0.121459	0.856007	0.27534	0.899188	0.933523	-0.152037	0.813953	-0.0408109	1	0.974725	-0.138578	0.921297			0.899356
g__Phocaeicola	-0.00313381	1	1	0.0749649	0.993769		0.42885	0.547586		0.985914		0.0753284	0.101375		0.853707	-0.874622	0.866709	0.939201	0.556133	0.795508			0.638718	-0.387018	0.661909			0.987015	-0.570719	0.999134			0.973511	0.11584	0.984836			1	0.00490545	1			0.973059	-0.149117	0.966568			0.973546
g__Eikenella	0.000209877	1	0.00116303	-0.181468	0.000927869		0.885259	0.516193		0.40485		0.622476	0.231126		0.171951	-0.0453903	0.944447	0.879769	0.324695	0.224709	0.176324	0.0682185	0.0894955	-0.0108684	0.975793	-0.517838	0.458353	0.585331	-0.372431	0.990346	0.0794146	0.720907	0.741235	-0.091545	0.595826	0.09343	0.648062	0.776419	-0.00538173	0.997677	0.0290809	0.92557	0.975561	-0.0482741	0.947737		1	0.939667
g__Shuttleworthia	-0.00265647	1	1	-0.125673			0.435497	0.385248				0.00235486	0.00159647			0.120269	0.922805	0.910509	-0.232406		-0.0241124	0.885642	0.854393	-0.107323		-0.102512	0.988097	0.97954	-0.396405		-0.0811125	0.22497	0.174747	0.0497426		-0.101839	0.061579	0.0465769	-0.0483642		-0.00401662	0.992302	0.987354	-0.151735			0.755037	0.724702
g__Haematobacter			0.806347	0.371813	0.856895			1		1			0.961393		0.970905			0.953213	0.423856	0.902055
g__Delftia	-5.89603		0.896866	0.253505	0.907457			0.360791		0.410958			0.832119		0.853707			0.93127	-1.40475	0.834044	-4.02259		0.939126	0.158933	0.951868	-6.16747		0.574646	0.920645	0.628373	10.3151		0.913032	0.267612	0.93159	17.5329		0.907354	0.22862	0.910709	3.78327		0.890591	0.212971	0.905926			1
g__Brochothrix	0.39558		0.860348	-0.137562	0.895321			0.375828		0.426653			0.426708		0.480937			0.981048	-1.00653	0.884999	-0.559611		0.822122	0.283923	0.853521			0.97954	-0.744476	0.976046	4.51111		0.988289	0.0601433	0.99892	-3.20041		0.940367	-0.136046	0.953578	1.48904		0.943721	0.13456	0.947737			1
g__Burkholderia	0.0499977		0.953213	-0.00619794	0.949784			0.923684		0.933323			0.945985		0.949816	2.1559		0.765571	0.665713	0.809721			0.763976	-0.305856	0.789657			0.999996	-0.364407	1			0.725696	-0.325631	0.761398			0.985608	0.0680013	0.987529			0.974725	-0.140249	0.966568			1
Unclassified f__Chitinophagaceae	0.872957		0.908674	-0.0615282	0.919041			0.930213		0.933323			0.933622		0.940778	4.51407		0.542386	0.960187	0.432517	-4.84415		0.976348	0.0901645	0.975793			0.97954	-0.699233	0.982257	-1.61712		1	0.0154796	1	-1.81538		0.853653	0.278603	0.87974	-2.34281		0.971184	-0.156915	0.966568			1
g__Bacteroides			1	0.0916158	1			0.282751		0.339542			0.930213		0.933323			0.953213	-1.30614	0.865777			0.756507	0.38679	0.781399			0.999996	-0.388167	1			0.973511	-0.113059	0.984836			0.943938	0.170373	0.955226			0.862678	0.260688	0.877978
g__Agrobacterium			0.991382	0.105755	0.996654			0.758319		0.797579			0.949972		0.959342			0.943751	-0.961385	0.902371			0.607435	-0.386592	0.640857			0.988901	-0.548228	0.999134			0.181495	-0.537258	0.230568			0.58987	-0.401124	0.648062			0.984474	-0.0961053	0.984656
g__Jeotgalicoccus			0.95341	-0.0311711	0.949784			0.939201		0.940778			0.98085		0.985914			0.950129	0.639884	0.887118
g__Pedobacter			0.868623	-0.175411	0.895321			0.877858		0.891215			0.59807		0.661335			1	0.378619	0.902371			0.891658	0.253762	0.92152			0.999996	-0.360235	1			0.987289	-0.0711231	0.993437			1	0.00594385	1			0.943721	0.177963	0.943488
g__Chryseobacterium	-3.76636		0.953213	0.184779	0.949784			0.622534		0.693792			0.94744		0.95744			0.845924	1.1581	0.413368			0.944827	-0.121809	0.955785			0.97954	-0.642716	0.989121			0.91518	-0.150579	0.937089			0.673261	-0.333104	0.69307			0.984302	-0.0929907	0.984654			1
g__Peptoniphilaceae_[G-2]			0.966714	0.0441863	0.980891			1		1			0.856636		0.870218			0.981048	-0.506147	0.949784			0.990368	0.0311099	1			0.999996	-0.319358	1			1	0.024044	1			0.754981	-0.347387	0.774682			0.97492	-0.142864	0.966568
g__Atopobium			0.953562	-0.00368549	0.960603			0.942898		0.947791			0.98085		0.986884			0.967572	0.811212	0.824102			0.976348	-0.0767533	0.975793			0.999996	-0.267302	1			0.975745	0.124452	0.988535			0.983039	0.112556	0.976147			0.984474	-0.101342	0.986449
g__Roseomonas			0.825406	-0.200922	0.882449			0.961877		0.972807			0.639015		0.716362			0.991382	-0.719744	0.921511			0.833196	-0.24507	0.871401			0.986335	-0.595253	0.992768			0.772525	-0.270393	0.822532			0.985608	0.0414951	0.995673			0.830734	0.270263	0.845009			0.9672
g__Odoribacter			0.953562	-0.00238477	0.960603			0.939201		0.940778			0.933622		0.940778			0.976602	-0.458019	0.957105			0.725226	-0.355112	0.741797			0.039899	1.95324	0.0531763			0.829325	0.407467	0.856458			0.595442	0.600098	0.648062			0.762762	-0.461844	0.790402
g__Bosea	1.73548		0.994636	0.0839865	0.998999			0.961877		0.971213			0.937976		0.940778			0.953562	-0.624831	0.935448			0.833585	0.317472	0.871401			0.999996	-0.31622	1			1	0.0169121	1			0.831422	0.340887	0.871898			0.869995	0.260447	0.885489			1
g__Flavitalea			0.815313	-0.14931	0.868504			1		1			0.503769		0.577533			0.903269	-1.29396	0.850815			0.845725	0.312546	0.885642			0.999996	-0.322904	1			0.98324	-0.0731285	0.991639			0.989616	0.0394462	0.997677			0.991119	-0.0526635	1
g__Peptoniphilaceae_[G-1]	4.75042		0.50204	0.479403	0.561167			0.902664		0.90424			0.902664		0.90424			0.953562	1.02581	0.580938	-0.132482		0.956677	-0.0979071	0.962479	0.233225		0.110948	1.46641	0.148062	-0.422175		0.745573	0.443753	0.78868	-0.591062		0.544915	-0.398883	0.603453	-0.414422		0.65921	-0.481633	0.687403			1
g__Escherichia	-1.40366		0.606716	-0.457843	0.662829			0.993085		0.998214			0.94033		0.94593			0.994636	0.43226	0.896008			0.870412	-0.231225	0.903019			0.999996	-0.384802	1			0.857397	-0.237946	0.882723			1	0.00655212	1			1	0.00174928	1			1
g__Brevundimonas	-0.701906		0.778624	-0.286938	0.82269			0.981286		0.988914			0.879769		0.893764			0.976602	0.986319	0.728745			0.976348	0.111924	0.974818			0.999996	-0.346888	1			0.987289	-0.0678494	0.993437			0.982365	-0.104414	0.976147			0.864289	0.263018	0.879746
g__Desulfomicrobium	1.53801		0.254478	0.549466	0.31443			0.471509		0.529961			0.939201		0.940955			0.875144	-1.43744	0.711966			0.902934	-0.151208	0.927153			0.977209	-0.772464	0.974687			1	-0.00885663	1			0.958241	0.129308	0.964137			0.908835	0.174838	0.92557			0.967015
Unclassified f__Rhodobacteraceae	-4.86246		0.768247	0.326786	0.812184			0.858687		0.879202			1		1	-0.937816		0.953213	-1.35171	0.840908			0.956677	-0.0987963	0.962479			0.97954	-0.732131	0.976942			0.672939	-0.298357	0.706609			0.985608	-0.0414523	0.994376			0.984474	0.0566911	0.986449			0.997374
g__Ruminococcaceae_[G-3]			0.953562	-0.00380347	0.960603			0.939201		0.940955			0.68954		0.740298			0.991382	-0.412816	0.960603			0.902934	-0.187639	0.927671			0.4978	1.11203	0.555352			0.94234	0.206583	0.959912			0.936707	-0.182065	0.948661			0.890591	-0.309783	0.905926
Unclassified o__Campylobacterales			0.874773	-0.186506	0.896464			0.94033		0.946236			0.98085		0.984417			0.970228	-0.489605	0.949784			0.958106	-0.116924	0.963654			0.999996	-0.324632	1			0.980991	0.110453	0.990787			0.86852	0.308058	0.887373			0.943721	0.181844	0.943488
Unclassified c__Actinomycetia			0.813938	0.363544	0.866406			0.94744		0.95744			0.910509		0.923499			0.974226	-0.558552	0.936872			0.363504	-0.562371	0.419945			0.999519	-0.440172	1			1	0.00777389	1			0.985608	-0.0829543	0.981648			0.929643	-0.26052	0.936002			1
Unclassified f__Peptoniphilaceae	-1.22344		0.804969	-0.194034	0.850815			1		1			0.872363		0.885259			0.958397	-0.900899	0.895321			0.956677	0.138474	0.962479			0.987486	-0.553398	0.999134			0.829325	0.389562	0.856458			0.959598	-0.132444	0.966003			0.973059	0.107498	0.966568			1
g__Klebsiella			0.918677	-0.0703707	0.921511			0.673646		0.735053			0.811774		0.838695			0.542547	1.7709	0.114217			0.976348	-0.0645741	0.975793			0.977209	-0.804849	0.97292			0.75399	0.431552	0.805909			1	0.00904453	1			0.978343	-0.118891	0.969677			1
g__Desulfovibrio	0.118348		0.330251	0.540742	0.390431			1		1			0.939201		0.940778			0.947706	0.778613	0.588632	-0.211769		0.95253	0.143679	0.961924			0.130856	1.40492	0.173438	0.670752		0.973511	-0.0961558	0.981055	0.18518		0.948784	-0.127226	0.958842	0.211418		0.991119	-0.0463953	1			0.995067
[truncated: 106 more columns]

## Sheet: Table 6B
Table S6B. Results for differential abundance tests carried out using MaAsLin3 with current environmental variables. See Methods for full details. Cells coloured in red indicate significant q-values (q ≤ 0.1).
Genus	Social deprivation		Material deprivation		Reside in GTA		Index of rurality		Greenspace		PM2.5
	Coefficient	q-value	Coefficient	q-value	Coefficient	q-value	Coefficient	q-value	Coefficient	q-value	Coefficient	q-value
g__Prevotella	-0.0104279	1	-0.011099	1	-0.0386444	0.137491	0.0529097	0.000149292	0.0181107	0.565094	-0.0464323	0.0574597
g__Staphylococcus	-0.0286649	0.991976	0.0630206	0.891523	0.0881372	0.943228	0.0600966	0.602974	-0.00959851	0.979249	-0.197078	0.0909216
g__Bacteroidetes_[G-3]	0.138752	0.885424	-0.0414854	0.995158	0.064684	0.989771	-0.337657	0.293686	-0.114443	0.929443	0.482322	0.0331002
g__Schaalia	-0.00448624	1	0.0136587	0.969697	0.0224558	0.918554	0.0162155	0.0601214	0.00806793	0.792198	-0.00828194	0.626239
Unclassified p__Proteobacteria	0.030237	0.991976	0.0468468	0.865397	-0.0371759	0.406841	0.049377	0.0696228	0.00989898	0.887531	0.011754	0.938845
g__Megasphaera	0.0109323	0.991976	-0.0101396	1	-0.0416762	0.367079	0.0516903	0.0533693	0.0124538	0.852825	-0.0458666	0.334469
g__Veillonella	0.0120571	0.991976	-0.00565061	1	-0.0297872	0.23387	0.0304174	0.00487089	0.0278043	0.377409	-0.0291783	0.213611
g__Lactococcus	-0.0914681	0.963579	-0.00430605	1	0.398652	0.0118109	-0.376841	0.0154297	-0.131682	0.794198	0.25907	0.20987
g__Lachnoanaerobaculum	0.00218845	1	-0.0285203	0.979406	-0.0137761	0.469936	0.0233466	0.0189935	0.018576	0.579578	-0.0287474	0.244036

## Sheet: Table 6C
Table S6C. Results for differential abundance tests carried out using MaAsLin3 with environmental variables. See Methods for full details. Cells coloured in red indicate significant q-values (q ≤ 0.1).
Genus	Current postal code												School postal code												In-utero postal code
	Social deprivation		Material deprivation		Reside in GTA		Index of rurality		Greenspace		PM2.5		Social deprivation		Material deprivation		Reside in GTA		Index of rurality		Greenspace		PM2.5		Social deprivation		Material deprivation		Reside in GTA		Index of rurality		Greenspace		PM2.5
	Coefficient	q-value	Coefficient	q-value	Coefficient	q-value	Coefficient	q-value	Coefficient	q-value	Coefficient	q-value	Coefficient	q-value	Coefficient	q-value	Coefficient	q-value	Coefficient	q-value	Coefficient	q-value	Coefficient	q-value	Coefficient	q-value	Coefficient	q-value	Coefficient	q-value	Coefficient	q-value	Coefficient	q-value	Coefficient	q-value
g__Prevotella	-0.0104279	1	-0.011099	1	-0.0386444	0.137491	0.0529097	0.000149292	0.0181107	0.565094	-0.0464323	0.0574597	-0.00862382	1	-0.0223445	0.982006	-0.0244975	0.20916	0.0376433	0.0288947	0.0316449	0.498666	-0.0395918	0.159318	0.0076577	0.887136	0.00986563	0.99824	-0.0436118	0.146415	0.0586959	0.0165573	0.0169035	0.633501	-0.0655858	0.00312771
g__Staphylococcus	-0.0286649	0.991976	0.0630206	0.891523	0.0881372	0.943228	0.0600966	0.602974	-0.00959851	0.979249	-0.197078	0.0909216	0.0470156	0.944885	0.0852037	0.719868	0.102161	0.937049	0.00209506	0.933592	-0.0686722	0.957747	-0.111122	0.547669	0.044281	0.905155	0.0376834	0.975454	-0.0101592	0.932986	0.112064	0.492893	0.0401603	0.911502	-0.216837	0.0423211
Unclassified f__Pasteurellaceae	0.0385293	0.991976	0.0731277	0.959921	-0.00969604	0.946527	0.0323952	0.891386	-0.256041	0.311424	-0.0476177	0.91767	0.212212	0.477198	0.128246	0.799228	0.0233095	0.973699	-0.0132503	0.963651	-0.354787	0.0761582	0.0623147	1	0.198089	0.501229	-0.0658738	0.934157	-0.029452	0.935232	0.0439398	0.923675	-0.249605	0.466925	0.0459616	1
g__Bacteroidetes_[G-3]	0.138752	0.885424	-0.0414854	0.995158	0.064684	0.989771	-0.337657	0.293686	-0.114443	0.929443	0.482322	0.0331002	-0.142163	0.924566	-0.0576844	0.977221	0.0943957	0.96797	-0.405323	0.238571	-0.117293	0.956956	0.358874	0.368521	0.0403628	0.952384	0.169965	0.825481	-0.113694	0.861082	-0.217957	0.831036	-0.0614658	0.976711	0.65436	0.0126087
g__Schaalia	-0.00448624	1	0.0136587	0.969697	0.0224558	0.918554	0.0162155	0.0601214	0.00806793	0.792198	-0.00828194	0.626239	0.00184423	0.978388	-0.0552071	0.775135	0.0209406	0.89001	0.0244069	0.132369	0.00935285	0.913312	-0.00183129	0.773225	0.0238659	0.745963	0.0415922	0.885639	0.023891	0.935232	0.0113804	0.475865	0.00811218	0.836191	-0.000556475	0.631539
Unclassified p__Proteobacteria	0.030237	0.991976	0.0468468	0.865397	-0.0371759	0.406841	0.049377	0.0696228	0.00989898	0.887531	0.011754	0.938845	-0.0130314	0.998409	0.0164955	0.932306	-0.0327132	0.521191	0.0670504	0.113651	0.00764358	0.957913	0.0213333	0.970107	-0.0374975	0.944134	-0.0213146	0.943225	-0.0801479	0.147506	0.109879	0.0169573	0.0306163	0.744451	-0.0366154	0.430661
g__Megasphaera	0.0109323	0.991976	-0.0101396	1	-0.0416762	0.367079	0.0516903	0.0533693	0.0124538	0.852825	-0.0458666	0.334469	0.0309664	0.891011	-0.021834	0.989481	-0.031945	0.504604	0.0526834	0.157079	0.0216462	0.913312	-0.0291571	0.615203	0.116814	0.0383134	-0.00719191	0.984443	-0.0327949	0.546538	0.0178375	0.644822	-0.00826899	0.954358	0.000243016	0.837961
g__Veillonella	0.0120571	0.991976	-0.00565061	1	-0.0297872	0.23387	0.0304174	0.00487089	0.0278043	0.377409	-0.0291783	0.213611	0.0150935	0.905074	-0.0339848	0.932608	-0.0421676	0.0642355	0.0417788	0.0206822	0.0379847	0.37058	-0.0235032	0.368521	0.0577763	0.136991	-0.00278394	0.984443	-0.0295102	0.300601	0.0150276	0.344968	0.038722	0.257442	-0.0123267	0.339847
g__Lactococcus	-0.0914681	0.963579	-0.00430605	1	0.398652	0.0118109	-0.376841	0.0154297	-0.131682	0.794198	0.25907	0.20987	-0.25003	0.341041	-0.123137	0.860114	0.394006	0.0379701	-0.343443	0.0829176	-0.0741036	0.963453	0.21987	0.520325	-0.14487	0.771829	-0.054763	0.935268	0.278945	0.33958	-0.328964	0.139012	0.142278	0.621203	0.0997717	0.927615
g__Lautropia	-0.0163181	0.996059	-0.0487026	0.959921	0.0949938	0.784824	-0.131068	0.294102	-0.046436	0.942496	0.110789	0.340017	0.0143547	0.955473	-0.0330026	0.965779	0.083865	0.901543	-0.0985619	0.862451	-0.0259734	0.994662	0.111023	0.623101	0.0220685	0.860679	-0.0162657	0.94712	0.114239	0.643201	-0.167888	0.0846129	-0.0634258	0.894694	0.171317	0.0248057
g__Bifidobacterium	-0.304901	0.722893	-0.132795	0.959921	0.469049	0.26211	-0.281365	0.753274	-0.0352304	0.99782	0.123819	0.939942	-0.484538	0.41302	-0.321555	0.614434	0.205677	0.910114	-0.184806	0.942857	-0.0222054	1	0.232491	0.922605	0.202805	0.905155	-0.742189	0.041349	0.50827	0.481138	-0.395492	0.702926	-0.0478471	0.993643	0.159887	0.931712
g__Simonsiella	0.0860131	0.860029	0.0302196	0.959921	-0.0153539	0.844861	-0.0554325	0.999782	-0.100549	0.732791	0.0548811	0.98006	0.174411	0.0543241	0.0327017	0.930518	0.0426977	0.981896	-0.0737379	0.976368	0.00671951	0.98282	0.0682719	0.978195	0.0850821	0.592803	0.0571169	0.924359	-0.0448113	0.720857	-0.0393252	0.983694	-0.0661689	0.925415	0.00610881	0.915129
g__Lachnoanaerobaculum	0.00218845	1	-0.0285203	0.979406	-0.0137761	0.469936	0.0233466	0.0189935	0.018576	0.579578	-0.0287474	0.244036	-0.0453481	0.756625	-0.0317263	0.950629	0.00643629	0.718658	0.0354035	0.0436401	0.0312225	0.5286	-0.0289653	0.304892	-0.00969757	0.974884	0.0107069	0.997026	-0.0144491	0.531402	0.0295154	0.189175	0.0401935	0.265162	-0.0400863	0.061589

## Sheet: Table 6D
Table S6D. Results for differential abundance tests carried out using MaAsLin3 with current environmental variables using ON-Marg. See Methods for full details. Cells coloured in red indicate significant q-values (q ≤ 0.1).
Genus	Reside in GTA		Index of rurality		Greenspace		PM2.5		ON-Marg housing		ON-Marg material		ON-Marg labour		ON-Marg race
	Coefficient	q-value	Coefficient	q-value	Coefficient	q-value	Coefficient	q-value	Coefficient	q-value	Coefficient	q-value	Coefficient	q-value	Coefficient	q-value
g__Prevotella	-0.0386444	0.137491	0.0529097	0.000149292	0.0181107	0.565094	-0.0464323	0.0574597	-0.0241098	0.647423	-0.0288777	0.874447	-0.042941	0.58032	-0.00135573	0.649904
g__Staphylococcus	0.0881372	0.943228	0.0600966	0.602974	-0.00959851	0.979249	-0.197078	0.0909216	0.0764815	0.888981	0.054825	0.881827	-0.0811367	0.771074	0.0736012	0.95373
g__Bacteroidetes_[G-3]	0.064684	0.989771	-0.337657	0.293686	-0.114443	0.929443	0.482322	0.0331002	0.114106	0.901665	0.0212927	0.970951	0.0578667	0.973638	0.0814852	0.958945
g__Lancefieldella	0.00789066	0.833599	0.00933375	0.230259	0.043647	0.307984	-0.0330502	0.327539	-0.0314572	0.682464	0.0227375	0.886976	0.0300029	0.93805	-0.0774898	0.0300375
g__Schaalia	0.0224558	0.918554	0.0162155	0.0601214	0.00806793	0.792198	-0.00828194	0.626239	0.000136481	0.945238	0.00553588	0.965846	0.0041168	0.990698	-0.00696593	0.649138
Unclassified p__Proteobacteria	-0.0371759	0.406841	0.049377	0.0696228	0.00989898	0.887531	0.011754	0.938845	-0.0119216	0.923784	0.0877414	0.256007	0.0110067	1	0.0662677	0.908677
g__Pseudomonas	0.293408	0.921756	-0.192841	0.970553	0.269958	0.917451	-0.550719	0.628903	-0.0807238	0.972355	-0.158999	0.952973	1.17932	0.0885466	-0.255646	0.909847
g__Rothia	0.00129023	0.703171	-0.00477517	0.251341	0.0240246	0.473181	-0.00498529	0.636511	-0.0205969	0.752283	-0.00463274	1	-0.00372493	0.966461	-0.0421396	0.0691483
g__Megasphaera	-0.0416762	0.367079	0.0516903	0.0533693	0.0124538	0.852825	-0.0458666	0.334469	0.0473851	0.884486	0.0163405	0.932322	0.0146051	0.991288	-0.0410491	0.503601
g__Veillonella	-0.0297872	0.23387	0.0304174	0.00487089	0.0278043	0.377409	-0.0291783	0.213611	0.0180335	0.972355	0.000318209	0.983369	-0.002329	0.970968	-0.0240043	0.21357
g__Lactococcus	0.398652	0.0118109	-0.376841	0.0154297	-0.131682	0.794198	0.25907	0.20987	0.0501513	0.961714	-0.123639	0.75549	0.0669623	0.925746	0.318066	0.20612
g__Lacticaseibacillus	0.220148	0.871454	-0.223115	0.719824	-0.338666	0.485157	0.160049	0.916279	0.131385	0.923784	0.723247	0.0136009	-0.0683636	0.958819	0.338155	0.690643
g__Oribacterium	0.0238424	0.918554	-0.0133176	0.452765	0.00846397	0.769975	0.0184753	0.939137	-0.0553003	0.157854	-0.032213	0.847856	-0.00896421	0.93837	-0.0475287	0.0640366
Unclassified o__Lactobacillales	-0.0581988	0.414551	0.0245251	0.57854	-0.0059901	0.967327	0.0604576	0.939942	-0.0384646	0.839078	0.018914	0.932322	0.0395295	0.94557	-0.130281	0.091268
g__Clostridiales_[F-1][G-1]	-0.0257366	0.946527	0.0251647	0.958794	0.124329	0.715585	-0.0331827	0.939942	-0.140191	0.742672	-0.230068	0.0905559	0.0969863	0.958534	-0.486134	0.0746087
g__Lachnoanaerobaculum	-0.0137761	0.469936	0.0233466	0.0189935	0.018576	0.579578	-0.0287474	0.244036	-0.0137792	0.842388	-0.0513513	0.567728	-0.042594	0.60134	-0.0129769	0.471377
