# Supplementary material for: Population-based characterisation of child and adolescent oral microbiomes
Source: Research Square preprint supplement (doi:10.21203/rs.3.rs-8378803/v1), 2025-12-18
Supplement: Supplementary file 7 [file e140690331c2e142a2383b33.xlsx]

## Sheet: Table S1A
Table S1a. Overview of participant demographics.
*values shown are for means/medians while numbers in brackets represent ranges. ^ This variable indicates whether participants have a second parent or caregiver, i.e. that they are not from a single-parent household.
Category	Average/Range of values		Number of participants	Participants with this variable (%)	Participants overall (%)	Participants missing variable
Age*	9.58 (5.0-18.96)		4812	100		None
Gender	Male		2411	50.1		None
	Female		2380	49.5
	Non-binary	Trans/ gender-diverse	18	0.4
	Demigirl		2	0.04
	Transgender female		1	0.02
Ethnicity	East Asian		1098	22.8		None
	South Asian		674	14
	White		3040	63.2
Physical/mental health	No reported condition		3070	63.8		None
	Physical health condition reported		930	19.3
	Mental health condition reported		482	10
	Physical & mental health conditions reported		330	6.9
HEFI*	35.20 (6.74-51.04)		2978	61.9		1834
Diet variety score (weekly)	13.67 (0-18)		2978	61.9
Antibiotic use	Within the last month		201	6.7	4.17706
	None		2777	93.3	57.7099
Social deprivation* (current)	-0.015 (-0.117-0.113)		4178	86.8246		634
Material deprivation* (current)	-0.003 (-0.153-0.153)
Index of rurality* (current)	0.053 (0-0.521)
Greenspace (growing season mean)* (current)	0.529 (0.184-0.832)
PM2.5* (µg m-3) (current)	7.662 (2.662-13.65)
Reside in GTA (current)	Yes		2637	63.05	54.8005
	No		1541	36.95	32.0241
ON-Marg household & dwellings* (current)	-0.413 (-2.049-3.573)		3776	78.4705		1036
ON-Marg material resources* (current)	-0.425 (-2.043-6.293)
ON-Marg age & labour* (current)	-0.453 (-2.671-3.571)
ON-Marg racialised & newcomer populations * (current)	0.285 (-1.514-4.227)
Household income	1: Less than $20,000		25	1.43596	0.519534	3071
	2: $20,000 to $49,999		96	5.51407	1.99501
	3: $50,000 to $79,999		191	10.9707	3.96924
	4: $80,000 to $99,999		232	13.3257	4.82128
	5: $100,000 to $199,999		768	44.1126	15.9601
	6: Over $200,000		429	24.641	8.91521
Parent 2^	Yes		1785	86.6	37.0948	2751
	No		276	13.4	5.73566
Family ID	Families with 1 child		2927	60.8271		None
	Families with 2 children		794	16.5004
	Families with 3 children		88	1.82876
	Families with 4 children		7	0.14547
	Families with 5 children		1	0.0207814
Social deprivation* (school)	-0.011 (-0.121-0.117)		2571	53.4289		2241
Material deprivation* (school)	-0.004 (-0.206-0.153)
Index of rurality* (school)	0.067 (0-0.521)
Greenspace (growing season mean)* (school)	0.529 (0.184-0.82)
PM2.5* (µg m-3) (school)	7.423 (3.7-13.5)
Social deprivation* (utero)	-0.006 (-0.119-0.117)
Material deprivation* (utero)	-0.005 (-0.149-0.160)
Index of rurality* (utero)	0.066 (0-0.521)
Greenspace (growing season mean)* (utero)	0.545 (0.172-0.828)
PM2.5* (µg m-3) (utero)	8.323 (4.023-11.606)
Reside in GTA (school)	Yes		1548	60.21	32.1696
	No		1023	39.79	21.2594
Reside in GTA (utero)	Yes		1574	61.2213	32.7099
	No		997	38.7787	20.719

## Sheet: Table S1B
Table S1b. Questions asked to participants.
Variable	Question asked to participants / Description of variable	Possible values
Ethnicity	Based on Four grandparents of a particular ethnicity	East Asian
		South Asian
		White
Gender	"[name]'s gender:	1: Male
	(what [name] identifies as)"	2: Female
		3: Trans/gender-diverse
Age	Age of child at enrollment	5-19 years
Physical/mental health condition	Whether the participant has been diagnosed with a physical health condition, a mental health condition, or both	no_reported_condition
		physical_condition
		mental_condition
		mental_and_physical
Material deprivation	Material deprivation score based on postal code from Principal Components
Social deprivation	Social deprivation score based on postal code from Principal Components
Household income	What is [nickname]'s total household income? (both parents/caregivers/guardians income added together)	1-6 (see table in S1A)
Parent 2	Does [nickname] have another parent/caregiver/guardian?	Yes/no
Reside in GTA	Whether the participant lives in the Greater Toronto Area based on postal code	Yes/no/unknown
Index of rurality	Continuous Value of Rurality - Current	0-1
Greenspace (growing season mean)	Greenspace Growing season mean of means based on postal code	0-1
PM2.5 (µg m-3)	Fine Particulate Matter (PM2.5) Mean based on postal code	Measurement
ON-Marg household & dwellings	Ontario marginalisation household and dwellings based on postal code from Principal Components
ON-Marg material resources	Ontario marginalisation material resources based on postal code from Principal Components
ON-Marg age & labour	Ontario marginalisation age and labour based on postal code from Principal Components
ON-Marg racialised & newcomer populations	Ontario marginalisation racialised and newcomer populations based on postal code from Principal Components
HEFI	Healthy eating food index calculated based on participants answers to DSQ4-8, 10-11, 13-23	0-60
Diet variety score (monthly)	Scores calculated on a daily, weekly or monthly basis indicating how many food items participants indicated consuming with these frequencies. Using the same DSQs as HEFI.	0-18
Diet variety score (weekly)
Diet variety score (daily)
Strict diet	Is [name] a strict...?	Omnivore
		Vegetarian
		Vegan
Antibiotics	Whether antibiotics were taken in the last month	not_in_the_last_month
		yes
DSQ2	In the past month, how often did [name] take probiotics, prebiotics, or food supplements?	0: Never 1: One time in the last month 2: Two-three times in the last month 3: Once per week 4: Twice per week 5: Three-four times per week 6: Five-six times per week 7: Once per day 8: Two or more times per day
DSQ4*	In the past month, how often did [name] eat whole grain products ? Include breads and cereals made from whole-wheat flour, bulgur, quinoa, oatmeal, brown and wild rice, farro
DSQ5*	In the past month, how often did [name] eat refined/milled grain products ? Include white bread, white rice, corn grits, cream of wheat and products made from white flour and white rice
DSQ6*	In the past month, how often did [name] consume any dairy milk? Include regular milk, chocolate milk, lactose-free or butter milk
DSQ7*	In the past month, how often did [name] consume any dairy yogurt?
DSQ8*	In the past month, how often did [name] consume dairy cheese? Include cheese as a snack, cheese on burgers, sandwiches and in food such as lasagne
DSQ9	In the past month, how often did [name] consume any NON-dairy milk, yogurt or cheese? Include milk/yogurt/cheese made from soy, almond, cashew, coconut, or oat
DSQ10*	In the past month , how often did [name] drink regular soda, pop that contains sugar or sweetened fruit drinks, sports or energy drinks, such as Kool-aid, lemonade, Hi-C, cranberry drink, Gatorade, Red Bull or Vitamin Water?
DSQ11*	In the past month , how often did [name] drink 100% pure fruit juices such as orange, mango, apple, grape and pineapple juices
DSQ12	In the past month, how often did [name] drink coffee or tea? Include presweetened drinks such as Arizona Ice Tea and Frappucino
DSQ13*	In the past month, how often did [name] eat fruit? Include fresh, frozen or canned fruit. Do NOT include fruit juices
DSQ14*	In the past month, how often did [name] eat vegetables? Include fresh, frozen or canned vegetables
DSQ15*	In the past month, how often did [name] eat beans or legumes? Include lentils, chickpeas, edamame (fresh, frozen or canned)
DSQ16*	In the past month, how often did [name] eat red meat such as beef, pork, ham, or sausage? Do not include chicken, turkey or seafood.
DSQ17*	In the past month, how often did [name] eat processed meat, such as bacon, lunchmeats, or hot dogs?
DSQ18*	In the past month, how often did [name] eat poultry such as chicken, turkey?
DSQ19*	In the past month, how often did [name] eat fish or seafood? Include fresh, frozen or canned fish or seafood
DSQ20*	In the past month, how often did [name] eat eggs?
DSQ21*	In the past month, how often did [name] eat tofu, soya burgers or soy-based meat substitutes?
DSQ22*	In the past month, how often did [name] eat desserts or sweet snacks such as cookies, cakes, pies, ice cream, chocolate and candy??
DSQ23*	In the past month, how often did [name] eat salty snack foods such as pretzels, potato chips, buttered popcorn and crackers?
* Indicates that answes to this question were used to calculate the HEFI and diet variety scores
