# Supplementary material for: Population-based characterisation of child and adolescent oral microbiomes
Source: Research Square preprint supplement (doi:10.21203/rs.3.rs-8378803/v1), 2025-12-18
Supplement: Supplementary file 8 [file e71660238662a83bf0b53f51.xlsx]

## Sheet: Sheet1
Table S9. Scoring system for the Spit for Science Dietary Screener
Component	Screener questions	Scoreing approach	Max points	Standard for minimum score (zero)	Standard for maximum score
Vegetables and fruits	13,14	Positive scored 0-8 points and summed/16	20	Never consuming fruits or vegetables	Consuming each item 2 or more times/day
Whole grain foods	4	Positive scored 0-8 points	5	Never consuming whole grains	Consuming each item 2 or more times/day
Whole grain ratio	4,5	Positive scored 0-8 points and summed for total, ratio	5	Never consuming whole grains	Ratio of 1.0
Protein foods	6,7,8,15,16,18,19,20,21	Positive scored 0-8 points and summed/72	5	Never consuming protein foods	Consuming each item 2 or more times/day
Plant Animal protein ratio	15,21/6,7,8,16,18,19,20	Positive scored 0-8 points and summed ploted-based and total, ratio	5	Never consuming plant-based protein foods	Ratio of 1.0
Foods & beverages high in sugar	10,11,22	Reverse-scored 0-9 pointes and summed/24	10	Consuming each item 2 or more times/day	Never consuming high sugar drinks or sweet snacks
Foods high in sodium/saturated fat	23,	Reverse-scored 0-9 pointes and summed	10	Consuming each item 2 or more times/day	Never consuming processed meats or salty snacks
Max score			60
