# Supplementary material for: Population-based characterisation of child and adolescent oral microbiomes
Source: Research Square preprint supplement (doi:10.21203/rs.3.rs-8378803/v1), 2025-12-18
Supplement: Supplementary file 9 [file f0910d8e8fb61e450cd44eef.xlsx]

## Sheet: Table S7A
Table S7A. Information on the variants that we examined in our genotyping data.
Details from Table 1 in Kamitaki et al.				Chromosome information					East Asian (EAS; n=931)					White/European (EUR; NFE in GnomAD; n=2760)					South Asian (SAS; n=596)
rsID	Loci	Lead variant	Notes	Chr	bp (hg38)	rsID	Ref	Alt	Type	R2	AF GnomAD	Number missing	Proportion missing	Type	R2	AF GnomAD	Number missing	Proportion missing	Type	R2	AF GnomAD	Number missing	Proportion missing
CNVs	AMY1	AMY1 copy number	Determines AMY1 gene dosage	chr1	103638545-103760549	CNVs	NA	NA	NA	NA	NA			NA	NA	NA			NA	NA	NA
rs13129697	SLC2A9	4_9925343_T_G	SLC2A9 eQTL and sQTL; replicates oral microbiome association; associated with serum urate	chr4	9925343	rs13129697	T	G	TYPED;IMPUTED	0.999791	0.4814	2	0.002148	TYPED;IMPUTED	0.999891	0.2709	1	0.0003623	TYPED;IMPUTED	0.99892	0.4293	0	0
rs5743618	TLR1	4_38797027_C_A	TLR1 I602S missense; affects immune response	chr4	38797027	rs5743618	C	A	NA	NA	0.989			IMPUTED	0.985386	0.2499	16	0.005797	IMPUTED	0.894313	0.8932	15	0.02517
rs28612397	SMR3A/B	4_70378787_C_T	SMR3A and SMR3B eQTL; SMR3B and MUC7 sQTL	chr4	70378787	rs28612397	C	T,G	NA	NA	0.1722			NA	NA	0.1371			NA	NA	0.04101
rs3749751	PITX1	5_135173987_C_T	Variant has unknown function; Pitx1 knockout causes jaw malformation	chr5	135173987	rs3749751	C	T	IMPUTED	0.929939	0.6649	57	0.06122	IMPUTED	0.978797	0.5886	44	0.01594	IMPUTED	0.956485	0.5228	36	0.0604
rs112652539	HLA	6_32535351_G_A	eQTL for six HLA class II genes	chr6	32535351	rs112652539	G	A,C	NA	NA	0.7006			NA	NA	0.674			NA	NA	0.6296
rs2519093	ABO	9_133266456_C_T	Tags A1 blood group allele	chr9	133266456	rs2519093	T	C	IMPUTED	0.964366	0.7951	1	0.001074	IMPUTED	0.986438	0.8045	1	1	IMPUTED	0.952311	0.8444	3	0.005034
rs12260868	PPP1R3C/ HECTD2	10_91541231_A_G	HECTD2 and PPP1R3C eQTL	chr10	91541231	rs12260868	A	G	IMPUTED	0.961952	0.1516	24	0.02578	IMPUTED	0.98131	0.3477	46	0.01667	IMPUTED	0.941049	0.2819	22	0.03691
rs7966710	PRB1- PRB4	12_11369682_G_A	PRB2 eQTL; PRB1 mCNV and PRB4 R39X also associate with oral microbiome composition	chr12	11369682	rs7966710	G	A,C	NA	NA	0.7658			NA	NA	0.7658			NA	NA	0.6451
rs17559023	POLI/ RAB27B	18_54457253_G_A	RAB27B, POLI, and C18orf54 eQTL; POLI sQTL	chr18	54457253	rs17559023	G	A	NA	NA	0.0009634			IMPUTED	0.988935	0.09484	20	0.007246	IMPUTED	0.986244	0.08499	5	0.008389
rs601338	FUT2	19_48703417_G_A	FUT2 W154X; primary determinant of secretor status	chr19	48703417	rs601338	G	A	NA	NA	0.001851			IMPUTED	0.969611	0.496	36	0.01304	IMPUTED	0.944597	0.3189	11	0.01846

## Sheet: Table S7B
Table S7B. PERMANOVA tests for associations between phylogenetic-RPCA distances and alternate allele frequency at seven loci in the human genome. Cells coloured in red indicate significant p-values (p ≤ 0.05).
Gene		East Asian		South Asian		European/White
ID	Loci	R2	p	R2	p	R2	p
rs13129697	SLC2A9	0.000877687	0.779	0.000885317	0.88	0.00017431	0.22
rs5743618	TLR1			0.000946786	0.572	0.000445524	0.771
rs3749751	PITX1	0.00137372	0.294	0.00338086	0.614	0.000180367	0.883
rs2519093	ABO	0.000394639	0.658	0.00152074	0.069	0.000354193	0.204
rs12260868	PPP1R3C/ HECTD2	0.000631724	0.118	0.000952622	0.016	0.000640963	0.323
rs17559023	POLI/ RAB27B			0.000110769	0.784	0.000141361	0.189
rs601338	FUT2			0.00212058	0.918	0.000142883	0.466

## Sheet: Table S7C
Table S7C. ANOVA tests for associations between alpha diversity metrics and alternate allele frequency at seven loci in the human genome. Cells coloured in red indicate significant p-values (p ≤ 0.05).
Gene		Chao1 richness						Faith's phylogenetic diversity						Observed ASVs						Shannon diversity						Simpson's index of diversity						Simpson's evenness
		East Asian		South Asian		European/White		East Asian		South Asian		European/White		East Asian		South Asian		European/White		East Asian		South Asian		European/White		East Asian		South Asian		European/White		East Asian		South Asian		European/White
ID	Loci	F	p	F	p	F	p	F	p	F	p	F	p	F	p	F	p	F	p	F	p	F	p	F	p	F	p	F	p	F	p	F	p	F	p	F	p
rs13129697	SLC2A9	0.486211	0.485858	7.82103e-05	0.992948	0.0257868	0.872436	0.0184612	0.891962	0.178135	0.673197	0.00290364	0.957031	0.635543	0.425605	0.295887	0.586761	0.000879383	0.976345	0.152952	0.695851	0.253866	0.61463	0.00551694	0.940797	0.0496579	0.823726	1.98801	0.159289	0.687857	0.406979	0.101932	0.74962	0.192179	0.661335	0.647789	0.420987
rs5743618	TLR1			0.189104	0.663892	4.99693	0.0254876			0.910894	0.34044	7.12167	0.0076691			0.86751	0.352194	7.37064	0.0066791			1.55948	0.212453	4.43996	0.0352147			2.51237	0.113727	0.735299	0.39126			1.10053	0.294768	0.0732615	0.78667
rs3749751	PITX1	0.222929	0.636975	0.873992	0.350419	0.749675	0.38667	0.185493	0.666837	0.492115	0.483395	2.06442	0.150909	0.0275467	0.86823	0.452108	0.501726	1.74008	0.187261	0.0958949	0.756911	0.0616523	0.804031	0.0219817	0.882149	0.0813039	0.775628	0.0146829	0.903615	0.936058	0.333396	0.377109	0.539369	1.45133	0.22903	2.96889	0.0850154
rs2519093	ABO	0.247686	0.618868	0.0288921	0.86511	0.605029	0.436745	0.00803256	0.928612	0.000403107	0.983991	0.616465	0.432444	0.128881	0.719705	7.27785e-07	0.99932	0.356149	0.550711	0.810275	0.368354	0.733197	0.392338	0.165419	0.684253	2.05934	0.15173	2.05975	0.151981	0.0091427	0.923833	3.54766	0.0600512	1.8966	0.169195	0.00126274	0.971656
rs12260868	PPP1R3C/ HECTD2	0.26544	0.606576	0.0219329	0.882339	0.0651762	0.798517	0.4537	0.500814	0.132513	0.71603	0.46994	0.493085	0.0796682	0.777834	0.031623	0.858946	0.460347	0.49753	0.29185	0.589216	0.0261763	0.871551	1.48994	0.222352	1.94985	0.163063	0.142468	0.706037	2.17984	0.139967	2.29349	0.130386	0.00227004	0.962023	1.42775	0.232256
rs17559023	POLI/ RAB27B			0.142413	0.706086	0.230125	0.631477			0.919429	0.338182	0.106947	0.743676			0.180856	0.670859	0.579154	0.446722			0.11278	0.73717	0.596135	0.440136			0.0197395	0.888335	0.067809	0.794577			0.337119	0.561811	0.937662	0.332981
rs601338	FUT2			0.858661	0.354653	0.499934	0.479601			0.0946408	0.758513	0.305717	0.580374			0.204593	0.651276	0.257717	0.611742			0.0127499	0.910152	0.552809	0.457248			0.261695	0.609231	1.11077	0.292026			0.582971	0.445585	0.161977	0.68738

## Sheet: Table S7D
Table S7D. Genera found to be significantly differentially abundant with allele frequency at one or more loci using MaAsLin3. See methods for full details. Cells coloured in red indicate significant q-values (q ≤ 0.1).
Genus	SLC2A9 (rs13129697)						TLR1 (rs5743618)				PITX1 (rs3749751)						ABO (rs2519093)						PPP1R3C/HECTD2 (rs12260868)						POLI/RAB27B (rs17559023)				FUT2 (rs601338)
	South Asian		European/White		East Asian		South Asian		European/White		South Asian		European/White		East Asian		South Asian		European/White		East Asian		South Asian		European/White		East Asian		South Asian		European/White		South Asian		European/White
	Coefficient	q	Coefficient	q	Coefficient	q	Coefficient	q	Coefficient	q	Coefficient	q	Coefficient	q	Coefficient	q	Coefficient	q	Coefficient	q	Coefficient	q	Coefficient	q	Coefficient	q	Coefficient	q	Coefficient	q	Coefficient	q	Coefficient	q	Coefficient	q
Unclassified c__Bacilli	-0.273209	0.884918	-0.0378601	0.99813	0.39366	0.343321	0.0312368	1	-0.0489502	0.980318	-0.178298	1	0.246222	0.0972481	-0.144129	1	0.461514	0.395663	0.0719644	0.974038	-0.026393	1	0.0281285	1	-0.0669614	0.954594	-0.243491	1	0.125573	1	-0.0551966	0.985172	-0.182156	0.935283	0.0176278	1
g__Sneathia	-0.148119	1	0.02624	0.960029	0.134839	0.942045	0.0368425	1	-0.0520563	0.957842	0.160385	0.96783	0.0212299	0.985581	-0.374951	0.25694	0.173886	0.94078	0.144789	0.385889	-0.188035	1	-0.124239	0.990866	0.0926911	0.622056	-0.0366243	1	-0.346115	0.106822	-0.0178065	1	-0.376584	0.0697267	-0.116707	0.494169
